# Supplementary material for: Discovery of an Allosteric Ligand Binding Site in SMYD3 Lysine Methyltransferase
Source: PubMed Central journal article supplement — Chembiochem. 2021 Feb 11;22(9):1597–608. doi: 10.1002/cbic.202000736 (PMC8248052; doi:10.1002/cbic.202000736), 2021-02-11
Supplement: CBIC-22-1597-s001.pdf [file CBIC-22-1597-s001.pdf]

# ChemBioChem

Supporting Information

## **Discovery of an Allosteric Ligand Binding Site in SMYD3 Lysine Methyltransferase**

Vladimir O. Talibov<sup>+</sup>, Edoardo Fabini<sup>+</sup>, Edward A. FitzGerald, Daniele Tedesco, Daniela Cederfeldt, Martin J. Talu, Moira M. Rachman, Filip Mihalic, Elisabetta Manoni, Marina Naldi, Paola Sanese, Giovanna Forte, Martina Lepore Signorile, Xavier Barril, Cristiano Simone, Manuela Bartolini, Doreen Dobritzsch, Alberto Del Rio,<sup>\*</sup> and U. Helena Danielson<sup>\*</sup>

Identities of the compounds screened with the developed SPR biosensor-based assay.

| Compound number | Compound name or compound commercial ID or compound internal ID | MW     | Structure                                                                                                                                                                                                                                                                                                                                                                                                                                                                                                                                                                                                           |
|-----------------|-----------------------------------------------------------------|--------|---------------------------------------------------------------------------------------------------------------------------------------------------------------------------------------------------------------------------------------------------------------------------------------------------------------------------------------------------------------------------------------------------------------------------------------------------------------------------------------------------------------------------------------------------------------------------------------------------------------------|
| 1               | Domperidone                                                     | 425.92 | 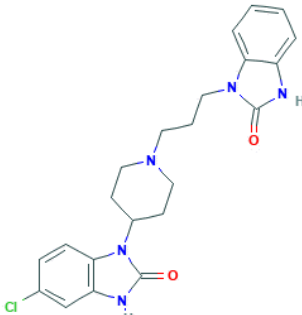 <p>The structure of Domperidone consists of a 4-chloro-1H-benzimidazole ring system. The 2-position of the benzimidazole is substituted with a piperidine ring. The 4-position of the piperidine ring is substituted with a propyl chain, which is further connected to the nitrogen atom of a second benzimidazole ring. The 2-position of this second benzimidazole ring is substituted with a hydrogen atom, and the 4-position is substituted with a hydrogen atom.</p>                                                      |
| 2               | Zimelidine dihydrochloride monohydrate                          | 408.17 |  <p>The structure of Zimelidine dihydrochloride monohydrate shows the zimelidine cation and two chloride counterions. The zimelidine cation is a 2-(4-bromophenyl)-2-(dimethylamino)pyridine derivative. The pyridine ring is substituted at the 2-position with a dimethylamino group and at the 4-position with a 4-bromophenyl group. The pyridine ring is also substituted at the 2-position with a dimethylamino group. The structure also shows a water molecule (H<sub>2</sub>O) and a chloride ion (Cl<sup>-</sup>).</p> |
| 3               | Mitoxantrone dihydrochloride                                    | 517.41 |  <p>The structure of Mitoxantrone dihydrochloride shows the mitoxantrone cation and two chloride counterions. The mitoxantrone cation is a naphthoquinone derivative with two diethylamino groups at the 1 and 8 positions. The structure also shows two chloride ions (Cl<sup>-</sup>).</p>                                                                                                                                                                                                                                    |
| 4               | Diperodon hydrochloride                                         | 433.94 |  <p>The structure of Diperodon hydrochloride shows the diperodon cation and a chloride counterion. The diperodon cation is a piperidine derivative with a dimethylamino group at the 4-position and a dimethylamino group at the 1-position. The structure also shows a chloride ion (Cl<sup>-</sup>).</p>                                                                                                                                                                                                                      |

|   |                          |        |                                                                                      |
|---|--------------------------|--------|--------------------------------------------------------------------------------------|
| 5 | Fenoterol hydrobromide   | 384.27 | 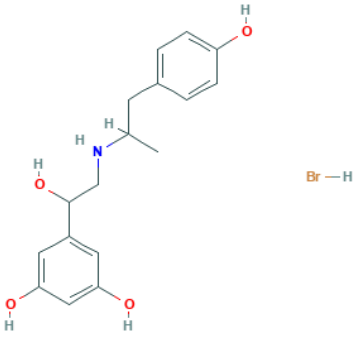   |
| 6 | Acebutolol hydrochloride | 327.90 |    |
| 7 | Terbutaline hemisulfate  | 548.66 |   |
| 8 | Neomycin sulfate         | 712.73 |  |
| 9 | Levonordefrin            | 183.21 |  |

|    |                               |        |                                                                                                                                                                                                                                                                                                                                                                                |
|----|-------------------------------|--------|--------------------------------------------------------------------------------------------------------------------------------------------------------------------------------------------------------------------------------------------------------------------------------------------------------------------------------------------------------------------------------|
| 10 | Cyclobenzaprine hydrochloride | 311.86 | 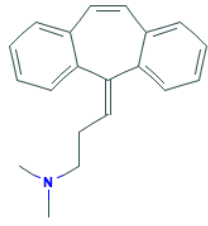 <p>The structure shows a tricyclic system consisting of a benzene ring fused to a seven-membered ring, which is further fused to another benzene ring. A propyl chain is attached to the seven-membered ring, ending in a dimethylamino group. Below the structure is the label "Cl-H".</p> |
| 11 | EM74                          | 343.43 |  <p>The structure features a benzimidazole ring system connected via a carbonyl group to a piperidine ring. The piperidine ring is further substituted with a tert-butyl carbamate group.</p>                                                                                                |
| 12 | EM77                          | 279.77 |  <p>The structure is similar to EM74, but the piperidine ring is substituted with a primary amine group (NH<sub>2</sub>) instead of a carbamate group. The label "NH<sub>2</sub> HCl" is present.</p>                                                                                        |
| 13 | EM80                          | 343.43 |  <p>The structure shows a benzimidazole ring system connected via a carbonyl group to a piperidine ring. The piperidine ring is substituted with a tert-butyl carbamate group.</p>                                                                                                          |
| 14 | F1736-2038                    | 352.41 |  <p>The structure is a complex heterocyclic molecule featuring a benzothiazole ring system. It is substituted with a primary amide group, a cyano group, and a pyridine ring.</p>                                                                                                          |
| 15 | F1683-0387                    | 402.43 |  <p>The structure is a complex heterocyclic molecule featuring a benzothiazole ring system. It is substituted with a primary amide group, a cyano group, a fluorophenyl ring, and a piperidine ring.</p>                                                                                   |

|    |            |        |                                                                                                                                                                                                                                                                                                                                                                                                              |
|----|------------|--------|--------------------------------------------------------------------------------------------------------------------------------------------------------------------------------------------------------------------------------------------------------------------------------------------------------------------------------------------------------------------------------------------------------------|
| 16 | F1045-0033 | 253.64 | 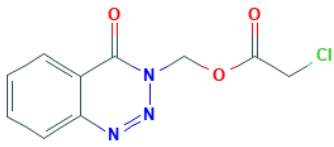 <p>Chemical structure of 2-(chloroacetyl)oxy-N-(1H-benzotriazol-2-yl)methanamine. It features a benzotriazole ring system connected via its nitrogen atom to a methylene group, which is further linked to an oxygen atom. This oxygen atom is part of an ester linkage to a chloroacetyl group (CH<sub>2</sub>COCl).</p> |
| 17 | F0440-0176 | 298.32 |  <p>Chemical structure of N-(2,3-dioxo-1H-indol-5-yl)acetamide. It consists of an indole-2,3-dione core with an acetamide group (-NHCOCH<sub>3</sub>) attached to the 5-position of the indole ring.</p>                                                                                                                   |
| 18 | F0651-0368 | 268.36 |  <p>Chemical structure of N-(2,3-dihydro-1H-indolizin-5-yl)acetamide. It features a 2,3-dihydro-1H-indolizin-5-yl ring system connected to an acetamide group (-NHCOCH<sub>3</sub>) at the 5-position.</p>                                                                                                               |
| 19 | F1883-1392 | 372.76 |  <p>Chemical structure of N-(2-chloroacetyl)acetamide. It shows an acetamide group (-NHCOCH<sub>3</sub>) where the nitrogen is further substituted with a 2-chloroacetyl group (-COCH<sub>2</sub>Cl).</p>                                                                                                                |
| 20 | F1883-1544 | 386.79 |  <p>Chemical structure of N-(2-chloroacetyl)acetamide. It features an acetamide group (-NHCOCH<sub>3</sub>) where the nitrogen is substituted with a 2-chloroacetyl group (-COCH<sub>2</sub>Cl).</p>                                                                                                                     |

|    |            |        |                                                                                      |
|----|------------|--------|--------------------------------------------------------------------------------------|
| 21 | F2865-0951 | 387.83 | 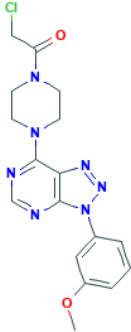  |
| 22 | F3225-7671 | 408.43 |    |
| 23 | F3225-7672 | 384.84 |  |
| 24 | F6262-6388 | 392.45 |  |
| 25 | F6436-1245 | 282.30 |  |

|    |            |        |                                                                                      |
|----|------------|--------|--------------------------------------------------------------------------------------|
| 26 | F6436-1315 | 346.34 | 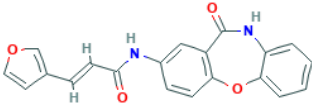   |
| 27 | F6436-2198 | 315.33 |    |
| 28 | F6436-3052 | 325.29 |  |
| 29 | F6442-4214 | 345.36 |  |
| 30 | F6521-7418 | 326.41 |  |

|    |            |        |                                                                                      |
|----|------------|--------|--------------------------------------------------------------------------------------|
| 31 | F6523-3565 | 326.37 | 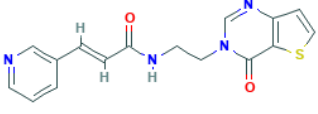   |
| 32 | F6523-4183 | 296.33 |    |
| 33 | F6524-3792 | 331.35 |  |
| 34 | BCI-121    | 340.22 |  |
| 35 | BB0304929  | 275.70 |  |



|    |           |        |                                                                                    |
|----|-----------|--------|------------------------------------------------------------------------------------|
| 36 | BB0304996 | 351.41 | 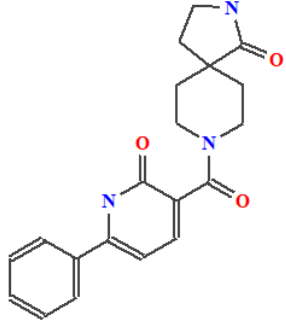 |
| 37 | EPZ031686 | 591.09 |  |
| 38 | NP-6      | 647.69 | Peptide NAFEAP                                                                     |
| 39 | SV-6      | 708.73 | Peptide SNNFEV                                                                     |
| 40 | NK-6      | 797.87 | Peptide NFFDQK                                                                     |

## Tables

|    |                                                                      |     |
|----|----------------------------------------------------------------------|-----|
| S1 | MM and DFT conformational search on ( <i>R</i> )-diperodon .....     | S3  |
| S2 | TD-DFT calculations on ( <i>R</i> )-diperodon .....                  | S8  |
| S3 | Effect of <i>rac</i> -diperodon on catalytic activity of SMYD3 ..... | S24 |
| S4 | X-ray data statistics .....                                          | S26 |

## Figures

|     |                                                                                           |     |
|-----|-------------------------------------------------------------------------------------------|-----|
| S1  | Preparation of blocked sensor surface .....                                               | S21 |
| S2  | Interaction kinetic analysis of the control compound, S-adenosyl-homocysteine (SAH) ..... | S21 |
| S3  | S-adenosyl-homocysteine (SAH) as a positive control .....                                 | S21 |
| S4  | Characterization of SMYD3 interaction with <i>rac</i> -diperodon .....                    | S22 |
| S5  | Characterization of blocked SMYD3 interaction with <i>rac</i> -diperodon .....            | S22 |
| S6  | Lowest-energy DFT conformers of ( <i>R</i> )-diperodon .....                              | S23 |
| S7  | Experimental and theoretical UV spectra of ( <i>R</i> )-diperodon .....                   | S24 |
| S8  | Effect of <i>rac</i> -diperodon on catalytic activity of SMYD3 .....                      | S24 |
| S9  | Effect of ( <i>S</i> )-diperodon on the interaction between SMYD3 and HSP90 .....         | S25 |
| S10 | Uncropped Western Blotting results .....                                                  | S25 |

**Table S1.** Results of the conformational search on the low-energy conformers of (*R*)-diperodon in conjugate acid form: relative MM energies ( $\Delta E_{MM}$ , MMFF94s), absolute and relative DFT electronic energies ( $E$  and  $\Delta E$ , B97D/def2-TZVP/IEFPCM[H<sub>2</sub>O]), Boltzmann populations at equilibrium based on DFT electronic energies ( $\chi_E$ ), and DFT free energies ( $G$ , B97D/def2-TZVP/IEFPCM[H<sub>2</sub>O]).

| Conf. | $\Delta E_{MM}$ , kcal mol <sup>-1</sup> | $E$ , $E_h$ ( $\Delta E$ , kcal mol <sup>-1</sup> ) | $\chi_E$ , % | $G$ , $E_h$  | Notes                               |
|-------|------------------------------------------|-----------------------------------------------------|--------------|--------------|-------------------------------------|
| c002  | 1.268                                    | -1319.8695264 (0.866)                               | 2.79         | -1319.459604 |                                     |
| c003  | 1.283                                    | -1319.8690060 (1.192)                               | 1.61         | -1319.458514 |                                     |
| c004  | 1.954                                    | —                                                   | —            | —            | clustered (c002, RMSD = 0.000 33 Å) |
| c005  | 2.074                                    | -1319.8674716 (2.155)                               | 0.32         | -1319.456486 |                                     |
| c006  | 2.340                                    | -1319.8684047 (1.570)                               | 0.85         | -1319.457351 |                                     |
| c007  | 2.391                                    | —                                                   | —            | —            | clustered (c002, RMSD = 0.000 27 Å) |
| c008  | 2.496                                    | -1319.8697703 (0.713)                               | 3.61         | -1319.458383 |                                     |
| c009  | 2.694                                    | -1319.8675451 (2.109)                               | 0.34         | -1319.456338 |                                     |
| c010  | 2.725                                    | -1319.8682160 (1.688)                               | 0.70         | -1319.456049 |                                     |
| c011  | 3.268                                    | -1319.8674729 (2.154)                               | 0.32         | -1319.456877 |                                     |
| c012  | 3.507                                    | -1319.8653931 (3.459)                               | 0.04         | -1319.453317 |                                     |
| c013  | 4.168                                    | -1319.8676041 (2.072)                               | 0.36         | -1319.454716 |                                     |
| c014  | 4.184                                    | -1319.8629220 (5.010)                               | 0.00         | -1319.452554 |                                     |
| c015  | 4.296                                    | -1319.8709060 (0.000)                               | 12.03        | -1319.457503 |                                     |
| c016  | 4.300                                    | -1319.8700556 (0.534)                               | 4.89         | -1319.458327 |                                     |
| c017  | 4.394                                    | -1319.8684440 (1.545)                               | 0.89         | -1319.459551 |                                     |
| c018  | 4.443                                    | -1319.8685366 (1.487)                               | 0.98         | -1319.454913 |                                     |
| c019  | 5.056                                    | -1319.8656911 (3.272)                               | 0.05         | -1319.453266 |                                     |
| c020  | 5.146                                    | -1319.8701049 (0.503)                               | 5.15         | -1319.455084 |                                     |
| c021  | 5.262                                    | -1319.8688457 (1.293)                               | 1.36         | -1319.457893 |                                     |
| c022  | 5.413                                    | -1319.8683196 (1.623)                               | 0.78         | -1319.456529 |                                     |
| c023  | 5.730                                    | -1319.8682274 (1.681)                               | 0.71         | -1319.459619 |                                     |
| c024  | 5.751                                    | -1319.8678406 (1.924)                               | 0.47         | -1319.456768 |                                     |
| c025  | 5.790                                    | -1319.8631467 (4.869)                               | 0.00         | -1319.450516 |                                     |
| c026  | 5.798                                    | -1319.8694420 (0.919)                               | 2.55         | -1319.455205 |                                     |
| c027  | 5.934                                    | -1319.8637083 (4.517)                               | 0.01         | -1319.454523 |                                     |
| c028  | 5.943                                    | -1319.8678374 (1.926)                               | 0.47         | -1319.458310 |                                     |
| c029  | 5.973                                    | -1319.8650627 (3.667)                               | 0.02         | -1319.453160 |                                     |
| c030  | 6.176                                    | -1319.8668309 (2.557)                               | 0.16         | -1319.457610 |                                     |
| c031  | 6.179                                    | -1319.8672179 (2.314)                               | 0.24         | -1319.456196 |                                     |
| c032  | 6.201                                    | -1319.8687732 (1.338)                               | 1.26         | -1319.454877 |                                     |
| c033  | 6.220                                    | —                                                   | —            | —            | clustered (c030, RMSD = 0.004 15 Å) |
| c034  | 6.225                                    | -1319.8692663 (1.029)                               | 2.12         | -1319.454340 |                                     |
| c035  | 6.245                                    | -1319.8677130 (2.004)                               | 0.41         | -1319.457628 |                                     |
| c036  | 6.270                                    | -1319.8693763 (0.960)                               | 2.38         | -1319.458977 |                                     |
| c037  | 6.275                                    | -1319.8666268 (2.685)                               | 0.13         | -1319.455643 |                                     |
| c038  | 6.377                                    | —                                                   | —            | —            | clustered (c045, RMSD = 0.000 78 Å) |
| c039  | 6.492                                    | -1319.8564210 (9.089)                               | 0.00         | -1319.445844 |                                     |
| c040  | 6.605                                    | —                                                   | —            | —            | discarded (imaginary frequency)     |
| c041  | 6.852                                    | -1319.8657252 (3.251)                               | 0.05         | -1319.455794 |                                     |
| c042  | 7.179                                    | -1319.8669852 (2.460)                               | 0.19         | -1319.454533 |                                     |
| c043  | 7.202                                    | -1319.8649106 (3.762)                               | 0.02         | -1319.453210 |                                     |
| c044  | 7.213                                    | -1319.8598861 (6.915)                               | 0.00         | -1319.449137 |                                     |
| c045  | 7.276                                    | -1319.8673750 (2.216)                               | 0.29         | -1319.456160 |                                     |
| c046  | 7.296                                    | -1319.8608397 (6.317)                               | 0.00         | -1319.451472 |                                     |
| c047  | 7.297                                    | -1319.8622176 (5.452)                               | 0.00         | -1319.454033 |                                     |
| c048  | 7.323                                    | -1319.8624830 (5.286)                               | 0.00         | -1319.453618 |                                     |
| c049  | 7.327                                    | —                                                   | —            | —            | discarded (imaginary frequency)     |
| c050  | 7.376                                    | -1319.8615641 (5.862)                               | 0.00         | -1319.451188 |                                     |
| c051  | 7.534                                    | -1319.8660844 (3.026)                               | 0.07         | -1319.454398 |                                     |
| c052  | 7.670                                    | —                                                   | —            | —            | clustered (c034, RMSD = 0.000 43 Å) |
| c053  | 7.705                                    | -1319.8675127 (2.129)                               | 0.33         | -1319.453255 |                                     |
| c054  | 7.720                                    | -1319.8682880 (1.643)                               | 0.75         | -1319.454355 |                                     |
| c055  | 7.727                                    | -1319.8669795 (2.464)                               | 0.19         | -1319.456214 |                                     |
| c056  | 7.790                                    | -1319.8660706 (3.034)                               | 0.07         | -1319.454376 |                                     |
| c057  | 7.832                                    | -1319.8658051 (3.201)                               | 0.05         | -1319.454016 |                                     |

Table S1. (Continued)

| Conf. | $\Delta E_{\text{MM}}$ , kcal mol <sup>-1</sup> | $E, E_{\text{h}}$ ( $\Delta E$ , kcal mol <sup>-1</sup> ) | $\chi_{\text{E}}$ , % | $G, E_{\text{h}}$ | Notes                               |
|-------|-------------------------------------------------|-----------------------------------------------------------|-----------------------|-------------------|-------------------------------------|
| c058  | 7.882                                           | -1319.8591729 (7.363)                                     | 0.00                  | -1319.448316      |                                     |
| c059  | 7.893                                           | -1319.8632453 (4.807)                                     | 0.00                  | -1319.450879      |                                     |
| c060  | 7.939                                           | -1319.8668650 (2.536)                                     | 0.17                  | -1319.454806      |                                     |
| c061  | 7.947                                           | -1319.8620434 (5.561)                                     | 0.00                  | -1319.450489      |                                     |
| c062  | 7.963                                           | -1319.8608719 (6.296)                                     | 0.00                  | -1319.450945      |                                     |
| c063  | 8.003                                           | -1319.8629887 (4.968)                                     | 0.00                  | -1319.450293      |                                     |
| c064  | 8.095                                           | -1319.8658471 (3.175)                                     | 0.06                  | -1319.453765      |                                     |
| c065  | 8.096                                           | -1319.8663687 (2.847)                                     | 0.10                  | -1319.455591      |                                     |
| c066  | 8.167                                           | -1319.8654229 (3.441)                                     | 0.04                  | -1319.453361      |                                     |
| c067  | 8.217                                           | -1319.8663302 (2.871)                                     | 0.09                  | -1319.453179      |                                     |
| c068  | 8.310                                           | -1319.8671323 (2.368)                                     | 0.22                  | -1319.458063      |                                     |
| c069  | 8.327                                           | —                                                         | —                     | —                 | clustered (c074, RMSD = 0.000 66 Å) |
| c070  | 8.327                                           | —                                                         | —                     | —                 | clustered (c074, RMSD = 0.000 72 Å) |
| c071  | 8.351                                           | -1319.8700254 (0.553)                                     | 4.74                  | -1319.454541      |                                     |
| c072  | 8.398                                           | -1319.8680357 (1.801)                                     | 0.58                  | -1319.456248      |                                     |
| c073  | 8.414                                           | -1319.8590182 (7.460)                                     | 0.00                  | -1319.447012      |                                     |
| c074  | 8.423                                           | -1319.8672536 (2.292)                                     | 0.25                  | -1319.456102      |                                     |
| c075  | 8.473                                           | -1319.8670840 (2.398)                                     | 0.21                  | -1319.454919      |                                     |
| c076  | 8.489                                           | -1319.8593942 (7.224)                                     | 0.00                  | -1319.448903      |                                     |
| c077  | 8.562                                           | -1319.8600411 (6.818)                                     | 0.00                  | -1319.449496      |                                     |
| c078  | 8.639                                           | -1319.8673315 (2.243)                                     | 0.27                  | -1319.453213      |                                     |
| c079  | 8.640                                           | —                                                         | —                     | —                 | clustered (c078, RMSD = 0.000 82 Å) |
| c080  | 8.950                                           | -1319.8585472 (7.755)                                     | 0.00                  | -1319.447192      |                                     |
| c081  | 8.950                                           | -1319.8615106 (5.896)                                     | 0.00                  | -1319.451227      |                                     |
| c082  | 9.049                                           | -1319.8647461 (3.865)                                     | 0.02                  | -1319.452645      |                                     |
| c083  | 9.101                                           | -1319.8684360 (1.550)                                     | 0.88                  | -1319.454185      |                                     |
| c084  | 9.114                                           | -1319.8589894 (7.478)                                     | 0.00                  | -1319.448519      |                                     |
| c085  | 9.153                                           | -1319.8591140 (7.400)                                     | 0.00                  | -1319.448909      |                                     |
| c086  | 9.165                                           | -1319.8630730 (4.915)                                     | 0.00                  | -1319.452966      |                                     |
| c087  | 9.166                                           | -1319.8617350 (5.755)                                     | 0.00                  | -1319.449401      |                                     |
| c088  | 9.208                                           | —                                                         | —                     | —                 | clustered (c053, RMSD = 0.000 48 Å) |
| c089  | 9.300                                           | -1319.8650024 (3.705)                                     | 0.02                  | -1319.453980      |                                     |
| c090  | 9.310                                           | -1319.8584467 (7.818)                                     | 0.00                  | -1319.446486      |                                     |
| c091  | 9.334                                           | -1319.8606955 (6.407)                                     | 0.00                  | -1319.448114      |                                     |
| c092  | 9.344                                           | -1319.8632868 (4.781)                                     | 0.00                  | -1319.452452      |                                     |
| c093  | 9.450                                           | -1319.8591194 (7.396)                                     | 0.00                  | -1319.447762      |                                     |
| c094  | 9.502                                           | -1319.8600951 (6.784)                                     | 0.00                  | -1319.448573      |                                     |
| c095  | 9.532                                           | -1319.8676082 (2.069)                                     | 0.37                  | -1319.455350      |                                     |
| c096  | 9.542                                           | -1319.8674433 (2.173)                                     | 0.31                  | -1319.457879      |                                     |
| c097  | 9.562                                           | -1319.8660410 (3.053)                                     | 0.07                  | -1319.453498      |                                     |
| c098  | 9.570                                           | -1319.8577996 (8.224)                                     | 0.00                  | -1319.446779      |                                     |
| c099  | 9.658                                           | -1319.8595498 (7.126)                                     | 0.00                  | -1319.449649      |                                     |
| c100  | 9.717                                           | -1319.8569040 (8.786)                                     | 0.00                  | -1319.444068      |                                     |
| c101  | 9.718                                           | -1319.8602128 (6.710)                                     | 0.00                  | -1319.449842      |                                     |
| c102  | 9.789                                           | -1319.8608533 (6.308)                                     | 0.00                  | -1319.449713      |                                     |
| c103  | 9.845                                           | -1319.8565824 (8.988)                                     | 0.00                  | -1319.446059      |                                     |
| c104  | 9.869                                           | -1319.8537864 (10.743)                                    | 0.00                  | -1319.442011      |                                     |
| c105  | 9.961                                           | -1319.8586321 (7.702)                                     | 0.00                  | -1319.447537      |                                     |
| c106  | 9.976                                           | —                                                         | —                     | —                 | discarded (imaginary frequency)     |
| c107  | 10.011                                          | -1319.8700331 (0.548)                                     | 4.77                  | -1319.454205      |                                     |
| c108  | 10.033                                          | -1319.8672694 (2.282)                                     | 0.26                  | -1319.456664      |                                     |
| c109  | 10.186                                          | -1319.8642409 (4.182)                                     | 0.01                  | -1319.454025      |                                     |
| c110  | 10.202                                          | -1319.8652644 (3.540)                                     | 0.03                  | -1319.455521      |                                     |
| c111  | 10.253                                          | -1319.8677304 (1.993)                                     | 0.42                  | -1319.457106      |                                     |
| c112  | 10.286                                          | -1319.8605442 (6.502)                                     | 0.00                  | -1319.448637      |                                     |
| c113  | 10.289                                          | -1319.8621018 (5.525)                                     | 0.00                  | -1319.450305      |                                     |
| c114  | 10.313                                          | -1319.8662496 (2.922)                                     | 0.09                  | -1319.452053      |                                     |
| c115  | 10.319                                          | -1319.8655166 (3.382)                                     | 0.04                  | -1319.452587      |                                     |
| c116  | 10.353                                          | -1319.8648457 (3.803)                                     | 0.02                  | -1319.454267      |                                     |

Table S1. (Continued)

| Conf. | $\Delta E_{MM}$ , kcal mol <sup>-1</sup> | $E$ , $E_h$ ( $\Delta E$ , kcal mol <sup>-1</sup> ) | $\chi_{E_r}$ % | $G$ , $E_h$  | Notes                               |
|-------|------------------------------------------|-----------------------------------------------------|----------------|--------------|-------------------------------------|
| c117  | 10.390                                   | -1319.8704828 (0.266)                               | 7.69           | -1319.457231 |                                     |
| c118  | 10.460                                   | -1319.8665369 (2.742)                               | 0.12           | -1319.454774 |                                     |
| c119  | 10.501                                   | —                                                   | —              | —            | clustered (c185, RMSD = 0.000 27 Å) |
| c120  | 10.551                                   | -1319.8609791 (6.229)                               | 0.00           | -1319.448870 |                                     |
| c121  | 10.597                                   | -1319.8564880 (9.047)                               | 0.00           | -1319.445753 |                                     |
| c122  | 10.607                                   | -1319.8696335 (0.799)                               | 3.13           | -1319.458032 |                                     |
| c123  | 10.638                                   | -1319.8629667 (4.982)                               | 0.00           | -1319.450517 |                                     |
| c124  | 10.694                                   | -1319.8579142 (8.152)                               | 0.00           | -1319.447232 |                                     |
| c125  | 10.707                                   | -1319.8580819 (8.047)                               | 0.00           | -1319.448331 |                                     |
| c126  | 10.714                                   | -1319.8647567 (3.859)                               | 0.02           | -1319.448945 |                                     |
| c127  | 10.720                                   | -1319.8695246 (0.867)                               | 2.79           | -1319.456125 |                                     |
| c128  | 10.747                                   | -1319.8669692 (2.470)                               | 0.19           | -1319.452501 |                                     |
| c129  | 10.761                                   | —                                                   | —              | —            | clustered (c026, RMSD = 0.000 76 Å) |
| c130  | 10.795                                   | -1319.8609832 (6.227)                               | 0.00           | -1319.448132 |                                     |
| c131  | 10.818                                   | -1319.8594919 (7.162)                               | 0.00           | -1319.448332 |                                     |
| c132  | 10.844                                   | -1319.8676802 (2.024)                               | 0.40           | -1319.454470 |                                     |
| c133  | 10.861                                   | -1319.8555780 (9.618)                               | 0.00           | -1319.444381 |                                     |
| c134  | 10.865                                   | —                                                   | —              | —            | clustered (c185, RMSD = 0.001 06 Å) |
| c135  | 10.873                                   | -1319.8586867 (7.668)                               | 0.00           | -1319.449848 |                                     |
| c136  | 10.910                                   | —                                                   | —              | —            | clustered (c185, RMSD = 0.000 95 Å) |
| c137  | 10.954                                   | -1319.8693354 (0.986)                               | 2.28           | -1319.457749 |                                     |
| c138  | 10.966                                   | -1319.8630814 (4.910)                               | 0.00           | -1319.453233 |                                     |
| c139  | 11.004                                   | -1319.8663244 (2.875)                               | 0.09           | -1319.453089 |                                     |
| c140  | 11.060                                   | -1319.8633123 (4.765)                               | 0.00           | -1319.450109 |                                     |
| c141  | 11.120                                   | -1319.8610957 (6.156)                               | 0.00           | -1319.449170 |                                     |
| c142  | 11.122                                   | -1319.8606647 (6.427)                               | 0.00           | -1319.448830 |                                     |
| c143  | 11.125                                   | -1319.8625030 (5.273)                               | 0.00           | -1319.450726 |                                     |
| c144  | 11.148                                   | -1319.8688959 (1.261)                               | 1.43           | -1319.455340 |                                     |
| c145  | 11.149                                   | -1319.8655512 (3.360)                               | 0.04           | -1319.451631 |                                     |
| c146  | 11.165                                   | -1319.8590451 (7.443)                               | 0.00           | -1319.447680 |                                     |
| c147  | 11.168                                   | -1319.8600550 (6.809)                               | 0.00           | -1319.449479 |                                     |
| c148  | 11.335                                   | -1319.8585912 (7.728)                               | 0.00           | -1319.445555 |                                     |
| c149  | 11.377                                   | -1319.8655778 (3.343)                               | 0.04           | -1319.452847 |                                     |
| c150  | 11.384                                   | —                                                   | —              | —            | clustered (c217, RMSD = 0.000 30 Å) |
| c151  | 11.408                                   | -1319.8610373 (6.193)                               | 0.00           | -1319.449455 |                                     |
| c152  | 11.466                                   | -1319.8652215 (3.567)                               | 0.03           | -1319.454487 |                                     |
| c153  | 11.467                                   | -1319.8656304 (3.310)                               | 0.05           | -1319.455135 |                                     |
| c154  | 11.499                                   | —                                                   | —              | —            | clustered (c122, RMSD = 0.001 41 Å) |
| c155  | 11.602                                   | -1319.8647062 (3.890)                               | 0.02           | -1319.455694 |                                     |
| c156  | 11.608                                   | -1319.8582780 (7.924)                               | 0.00           | -1319.444654 |                                     |
| c157  | 11.664                                   | -1319.8642910 (4.151)                               | 0.01           | -1319.452966 |                                     |
| c158  | 11.670                                   | —                                                   | —              | —            | clustered (c169, RMSD = 0.000 80 Å) |
| c159  | 11.678                                   | -1319.8589823 (7.482)                               | 0.00           | -1319.448061 |                                     |
| c160  | 11.680                                   | -1319.8589776 (7.485)                               | 0.00           | -1319.446829 |                                     |
| c161  | 11.774                                   | -1319.8625375 (5.251)                               | 0.00           | -1319.452248 |                                     |
| c162  | 11.789                                   | -1319.8605051 (6.527)                               | 0.00           | -1319.450194 |                                     |
| c163  | 11.883                                   | -1319.8596589 (7.058)                               | 0.00           | -1319.447785 |                                     |
| c164  | 11.902                                   | -1319.8570223 (8.712)                               | 0.00           | -1319.446068 |                                     |
| c165  | 11.963                                   | -1319.8605624 (6.491)                               | 0.00           | -1319.448348 |                                     |
| c166  | 11.968                                   | -1319.8634067 (4.706)                               | 0.00           | -1319.451493 |                                     |
| c167  | 11.972                                   | -1319.8601014 (6.780)                               | 0.00           | -1319.449570 |                                     |
| c168  | 11.984                                   | -1319.8602152 (6.709)                               | 0.00           | -1319.448726 |                                     |
| c169  | 12.013                                   | -1319.8597708 (6.987)                               | 0.00           | -1319.449443 |                                     |
| c170  | 12.043                                   | -1319.8543669 (10.378)                              | 0.00           | -1319.443880 |                                     |
| c171  | 12.057                                   | -1319.8653847 (3.465)                               | 0.03           | -1319.452584 |                                     |
| c172  | 12.107                                   | -1319.8584162 (7.837)                               | 0.00           | -1319.447353 |                                     |
| c173  | 12.112                                   | -1319.8621370 (5.503)                               | 0.00           | -1319.451515 |                                     |
| c174  | 12.165                                   | -1319.8617947 (5.717)                               | 0.00           | -1319.448997 |                                     |
| c175  | 12.226                                   | -1319.8584371 (7.824)                               | 0.00           | -1319.447072 |                                     |

Table S1. (Continued)

| Conf. | $\Delta E_{MM}$ , kcal mol <sup>-1</sup> | $E$ , $E_h$ ( $\Delta E$ , kcal mol <sup>-1</sup> ) | $\chi_{E_r}$ % | $G$ , $E_h$  | Notes                               |
|-------|------------------------------------------|-----------------------------------------------------|----------------|--------------|-------------------------------------|
| c176  | 12.240                                   | -1319.8661554 (2.981)                               | 0.08           | -1319.453571 |                                     |
| c177  | 12.244                                   | -1319.8688248 (1.306)                               | 1.33           | -1319.455031 |                                     |
| c178  | 12.309                                   | -1319.8635968 (4.587)                               | 0.01           | -1319.449947 |                                     |
| c179  | 12.311                                   | -1319.8631807 (4.848)                               | 0.00           | -1319.448883 |                                     |
| c180  | 12.312                                   | -1319.8667830 (2.587)                               | 0.15           | -1319.454565 |                                     |
| c181  | 12.343                                   | -1319.8561221 (9.277)                               | 0.00           | -1319.445759 |                                     |
| c182  | 12.351                                   | —                                                   | —              | —            | clustered (c261, RMSD = 0.001 39 Å) |
| c183  | 12.363                                   | -1319.8613089 (6.022)                               | 0.00           | -1319.448912 |                                     |
| c184  | 12.366                                   | -1319.8681867 (1.706)                               | 0.68           | -1319.456148 |                                     |
| c185  | 12.372                                   | -1319.8684621 (1.534)                               | 0.90           | -1319.454878 |                                     |
| c186  | 12.399                                   | -1319.8651406 (3.618)                               | 0.03           | -1319.451520 |                                     |
| c187  | 12.399                                   | —                                                   | —              | —            | clustered (c053, RMSD = 0.000 64 Å) |
| c188  | 12.417                                   | —                                                   | —              | —            | clustered (c261, RMSD = 0.001 25 Å) |
| c189  | 12.420                                   | -1319.8580849 (8.045)                               | 0.00           | -1319.447990 |                                     |
| c190  | 12.454                                   | -1319.8650097 (3.700)                               | 0.02           | -1319.455682 |                                     |
| c191  | 12.474                                   | -1319.8557274 (9.525)                               | 0.00           | -1319.444283 |                                     |
| c192  | 12.476                                   | -1319.8582448 (7.945)                               | 0.00           | -1319.447385 |                                     |
| c193  | 12.492                                   | -1319.8624195 (5.325)                               | 0.00           | -1319.450500 |                                     |
| c194  | 12.528                                   | -1319.8582953 (7.913)                               | 0.00           | -1319.445955 |                                     |
| c195  | 12.553                                   | -1319.8674226 (2.186)                               | 0.30           | -1319.456558 |                                     |
| c196  | 12.571                                   | -1319.8590395 (7.446)                               | 0.00           | -1319.446776 |                                     |
| c197  | 12.681                                   | -1319.8640136 (4.325)                               | 0.01           | -1319.451326 |                                     |
| c198  | 12.709                                   | -1319.8578536 (8.191)                               | 0.00           | -1319.448555 |                                     |
| c199  | 12.741                                   | -1319.8663365 (2.867)                               | 0.10           | -1319.451812 |                                     |
| c200  | 12.784                                   | -1319.8674610 (2.162)                               | 0.31           | -1319.454681 |                                     |
| c201  | 12.787                                   | -1319.8574689 (8.432)                               | 0.00           | -1319.445933 |                                     |
| c202  | 12.839                                   | -1319.8662595 (2.916)                               | 0.09           | -1319.451634 |                                     |
| c203  | 12.859                                   | -1319.8581935 (7.977)                               | 0.00           | -1319.448236 |                                     |
| c204  | 12.877                                   | -1319.8639076 (4.392)                               | 0.01           | -1319.451710 |                                     |
| c205  | 12.908                                   | -1319.8672380 (2.302)                               | 0.25           | -1319.452764 |                                     |
| c206  | 12.912                                   | -1319.8594856 (7.166)                               | 0.00           | -1319.446752 |                                     |
| c207  | 12.935                                   | -1319.8671693 (2.345)                               | 0.23           | -1319.451666 |                                     |
| c208  | 13.004                                   | -1319.8580848 (8.045)                               | 0.00           | -1319.446305 |                                     |
| c209  | 13.063                                   | -1319.8581443 (8.008)                               | 0.00           | -1319.449132 |                                     |
| c210  | 13.065                                   | -1319.8635650 (4.607)                               | 0.01           | -1319.450725 |                                     |
| c211  | 13.072                                   | -1319.8575252 (8.397)                               | 0.00           | -1319.446068 |                                     |
| c212  | 13.189                                   | -1319.8652355 (3.558)                               | 0.03           | -1319.451897 |                                     |
| c213  | 13.194                                   | -1319.8656933 (3.271)                               | 0.05           | -1319.451584 |                                     |
| c214  | 13.210                                   | -1319.8604875 (6.538)                               | 0.00           | -1319.449938 |                                     |
| c215  | 13.234                                   | -1319.8639820 (4.345)                               | 0.01           | -1319.448675 |                                     |
| c216  | 13.257                                   | -1319.8640352 (4.311)                               | 0.01           | -1319.452871 |                                     |
| c217  | 13.314                                   | -1319.8669905 (2.457)                               | 0.19           | -1319.453004 |                                     |
| c218  | 13.352                                   | -1319.8616272 (5.823)                               | 0.00           | -1319.449622 |                                     |
| c219  | 13.475                                   | -1319.8510990 (12.429)                              | 0.00           | -1319.442746 |                                     |
| c220  | 13.477                                   | -1319.8568340 (8.830)                               | 0.00           | -1319.446257 |                                     |
| c221  | 13.537                                   | -1319.8652590 (3.544)                               | 0.03           | -1319.453066 |                                     |
| c222  | 13.542                                   | -1319.8650983 (3.644)                               | 0.03           | -1319.453369 |                                     |
| c223  | 13.550                                   | —                                                   | —              | —            | clustered (c074, RMSD = 0.000 86 Å) |
| c224  | 13.554                                   | -1319.8590075 (7.466)                               | 0.00           | -1319.444077 |                                     |
| c225  | 13.559                                   | -1319.8620549 (5.554)                               | 0.00           | -1319.451716 |                                     |
| c226  | 13.598                                   | -1319.8564140 (9.094)                               | 0.00           | -1319.443954 |                                     |
| c227  | 13.635                                   | -1319.8567126 (8.906)                               | 0.00           | -1319.447865 |                                     |
| c228  | 13.678                                   | -1319.8620605 (5.551)                               | 0.00           | -1319.450485 |                                     |
| c229  | 13.703                                   | -1319.8513742 (12.256)                              | 0.00           | -1319.441156 |                                     |
| c230  | 13.709                                   | -1319.8641816 (4.220)                               | 0.01           | -1319.450048 |                                     |
| c231  | 13.715                                   | -1319.8683214 (1.622)                               | 0.78           | -1319.454169 |                                     |
| c232  | 13.718                                   | -1319.8582351 (7.951)                               | 0.00           | -1319.448424 |                                     |
| c233  | 13.737                                   | -1319.8578942 (8.165)                               | 0.00           | -1319.446778 |                                     |
| c234  | 13.787                                   | -1319.8648352 (3.809)                               | 0.02           | -1319.453726 |                                     |

Table S1. (Continued)

| Conf. | $\Delta E_{MM}$ , kcal mol <sup>-1</sup> | $E$ , $E_h$ ( $\Delta E$ , kcal mol <sup>-1</sup> ) | $\chi_{E_r}$ % | $G$ , $E_h$  | Notes                               |
|-------|------------------------------------------|-----------------------------------------------------|----------------|--------------|-------------------------------------|
| c235  | 13.792                                   | —                                                   | —              | —            | clustered (c240, RMSD = 0.001 05 Å) |
| c236  | 13.810                                   | —                                                   | —              | —            | clustered (c240, RMSD = 0.000 69 Å) |
| c237  | 13.823                                   | -1319.8592526 (7.313)                               | 0.00           | -1319.445299 |                                     |
| c238  | 13.841                                   | -1319.8632962 (4.775)                               | 0.00           | -1319.448387 |                                     |
| c239  | 13.866                                   | -1319.8524923 (11.555)                              | 0.00           | -1319.441682 |                                     |
| c240  | 13.881                                   | -1319.8607141 (6.395)                               | 0.00           | -1319.446889 |                                     |
| c241  | 13.883                                   | —                                                   | —              | —            | clustered (c225, RMSD = 0.000 31 Å) |
| c242  | 13.884                                   | -1319.8689825 (1.207)                               | 1.57           | -1319.454777 |                                     |
| c243  | 13.905                                   | -1319.8617108 (5.770)                               | 0.00           | -1319.449827 |                                     |
| c244  | 13.905                                   | —                                                   | —              | —            | discarded (imaginary frequency)     |
| c245  | 13.959                                   | -1319.8626553 (5.177)                               | 0.00           | -1319.450522 |                                     |
| c246  | 13.963                                   | -1319.8650831 (3.654)                               | 0.03           | -1319.450399 |                                     |
| c247  | 13.966                                   | -1319.8686896 (1.391)                               | 1.15           | -1319.455140 |                                     |
| c248  | 13.980                                   | -1319.8677599 (1.974)                               | 0.43           | -1319.454536 |                                     |
| c249  | 14.010                                   | -1319.8656311 (3.310)                               | 0.05           | -1319.452136 |                                     |
| c250  | 14.021                                   | -1319.8603998 (6.593)                               | 0.00           | -1319.449784 |                                     |
| c251  | 14.033                                   | -1319.8589534 (7.500)                               | 0.00           | -1319.448665 |                                     |
| c252  | 14.047                                   | -1319.8613044 (6.025)                               | 0.00           | -1319.451089 |                                     |
| c253  | 14.050                                   | —                                                   | —              | —            | clustered (c271, RMSD = 0.000 21 Å) |
| c254  | 14.091                                   | -1319.8609480 (6.249)                               | 0.00           | -1319.447479 |                                     |
| c255  | 14.097                                   | -1319.8627614 (5.111)                               | 0.00           | -1319.453503 |                                     |
| c256  | 14.141                                   | -1319.8517716 (12.007)                              | 0.00           | -1319.441342 |                                     |
| c257  | 14.147                                   | -1319.8537728 (10.751)                              | 0.00           | -1319.441793 |                                     |
| c258  | 14.150                                   | -1319.8676994 (2.012)                               | 0.40           | -1319.454283 |                                     |
| c259  | 14.159                                   | -1319.8596518 (7.062)                               | 0.00           | -1319.443760 |                                     |
| c260  | 14.163                                   | -1319.8606344 (6.445)                               | 0.00           | -1319.448760 |                                     |
| c261  | 14.182                                   | -1319.8666639 (2.662)                               | 0.13           | -1319.452512 |                                     |
| c262  | 14.186                                   | -1319.8583337 (7.889)                               | 0.00           | -1319.445820 |                                     |
| c263  | 14.311                                   | -1319.8669970 (2.453)                               | 0.19           | -1319.455111 |                                     |
| c264  | 14.352                                   | -1319.8567527 (8.881)                               | 0.00           | -1319.445032 |                                     |
| c265  | 14.355                                   | -1319.8642580 (4.172)                               | 0.01           | -1319.451902 |                                     |
| c266  | 14.360                                   | -1319.8595055 (7.154)                               | 0.00           | -1319.445491 |                                     |
| c267  | 14.370                                   | -1319.8629609 (4.986)                               | 0.00           | -1319.451755 |                                     |
| c268  | 14.377                                   | -1319.8581518 (8.003)                               | 0.00           | -1319.444820 |                                     |
| c269  | 14.405                                   | —                                                   | —              | —            | discarded (imaginary frequency)     |
| c270  | 14.421                                   | —                                                   | —              | —            | discarded (imaginary frequency)     |
| c271  | 14.440                                   | -1319.8567337 (8.893)                               | 0.00           | -1319.446537 |                                     |
| c272  | 14.486                                   | -1319.8613667 (5.986)                               | 0.00           | -1319.448933 |                                     |
| c273  | 14.499                                   | -1319.8586650 (7.681)                               | 0.00           | -1319.448023 |                                     |
| c274  | 14.500                                   | —                                                   | —              | —            | clustered (c273, RMSD = 0.000 53 Å) |
| c275  | 14.542                                   | -1319.8646063 (3.953)                               | 0.02           | -1319.453248 |                                     |
| c276  | 14.542                                   | -1319.8604673 (6.550)                               | 0.00           | -1319.449334 |                                     |
| c277  | 14.585                                   | -1319.8570739 (8.680)                               | 0.00           | -1319.444144 |                                     |
| c278  | 14.679                                   | -1319.8600121 (6.836)                               | 0.00           | -1319.449301 |                                     |
| c279  | 14.680                                   | -1319.8654580 (3.419)                               | 0.04           | -1319.449731 |                                     |
| c280  | 14.691                                   | -1319.8644153 (4.073)                               | 0.01           | -1319.452152 |                                     |
| c281  | 14.726                                   | -1319.8598409 (6.943)                               | 0.00           | -1319.448587 |                                     |
| c282  | 14.737                                   | -1319.8611860 (6.099)                               | 0.00           | -1319.445546 |                                     |
| c283  | 14.750                                   | -1319.8580983 (8.037)                               | 0.00           | -1319.448189 |                                     |
| c284  | 14.803                                   | -1319.8701662 (0.464)                               | 5.50           | -1319.455179 |                                     |
| c285  | 14.832                                   | —                                                   | —              | —            | clustered (c222, RMSD = 0.000 71 Å) |
| c286  | 14.854                                   | -1319.8594435 (7.193)                               | 0.00           | -1319.447266 |                                     |
| c287  | 14.861                                   | -1319.8582337 (7.952)                               | 0.00           | -1319.444248 |                                     |
| c288  | 14.924                                   | —                                                   | —              | —            | discarded (imaginary frequency)     |
| c289  | 14.935                                   | —                                                   | —              | —            | discarded (imaginary frequency)     |
| c290  | 14.950                                   | -1319.8607980 (6.343)                               | 0.00           | -1319.449140 |                                     |
| c291  | 14.952                                   | -1319.8590032 (7.469)                               | 0.00           | -1319.448659 |                                     |
| c292  | 14.954                                   | -1319.8598171 (6.958)                               | 0.00           | -1319.443600 |                                     |
| c293  | 14.972                                   | -1319.8567109 (8.908)                               | 0.00           | -1319.446058 |                                     |

**Table S2.** Oscillator strengths ( $f_j$ ), rotational strengths in dipole length form ( $R_j$ ), and excitation wavelengths ( $\lambda_j$ ) for the first 50 excited states of the conformers of (R)-diperodon, as calculated by TD-DFT calculations at the PBE0/def2-TZVP/IEFPCM[H<sub>2</sub>O] level after DFT optimization at the B97D/def2-TZVP/IEFPCM[H<sub>2</sub>O] level.

| $j$ | $f_j; R_j, 10^{-40} \text{ erg cm}^3 (\lambda_j, \text{nm})$ |                            |                            |                            |                           |
|-----|--------------------------------------------------------------|----------------------------|----------------------------|----------------------------|---------------------------|
|     | c001                                                         | c002                       | c003                       | c005                       | c006                      |
| 1   | 0.0179; -8.3627 (246.39)                                     | 0.0164; 6.2154 (246.18)    | 0.0202; 7.7549 (246.21)    | 0.0184; -8.4074 (246.50)   | 0.0193; -6.9010 (246.00)  |
| 2   | 0.0188; 11.0196 (244.46)                                     | 0.0193; 5.4865 (244.31)    | 0.0218; -10.5837 (244.50)  | 0.0204; 11.3659 (244.43)   | 0.0201; -2.9549 (244.22)  |
| 3   | 0.5325; -220.2807 (233.74)                                   | 0.9421; -118.5613 (233.70) | 0.8728; 149.0347 (233.72)  | 0.5120; -213.4147 (233.86) | 1.1007; -46.3212 (233.26) |
| 4   | 0.5263; 159.3615 (230.55)                                    | 0.1689; 95.4984 (230.67)   | 0.2517; -128.7751 (230.72) | 0.5596; 154.1575 (230.59)  | 0.0495; 20.9642 (230.41)  |
| 5   | 0.0068; 1.4259 (226.83)                                      | 0.0015; -0.7594 (222.99)   | 0.0019; 0.8404 (223.18)    | 0.0104; 2.0775 (227.62)    | 0.0021; 0.0604 (221.63)   |
| 6   | 0.0000; -0.0010 (216.00)                                     | 0.0000; 0.0176 (212.25)    | 0.0000; -0.0034 (212.83)   | 0.0000; -0.0023 (216.47)   | 0.0000; 0.0023 (211.34)   |
| 7   | 0.0001; 0.1378 (213.11)                                      | 0.0000; 0.0289 (210.94)    | 0.0000; 0.0557 (210.97)    | 0.0001; 0.1210 (213.08)    | 0.0000; -0.0738 (209.66)  |
| 8   | 0.0000; 0.0000 (208.44)                                      | 0.0001; 0.0066 (205.79)    | 0.0000; 0.0069 (206.04)    | 0.0000; -0.0029 (208.48)   | 0.0001; 0.0047 (204.85)   |
| 9   | 0.2024; -33.9448 (196.75)                                    | 0.2528; 59.2399 (197.02)   | 0.2398; 62.0668 (196.90)   | 0.2019; -19.8079 (196.89)  | 0.2498; 21.2133 (196.67)  |
| 10  | 0.0935; 21.4739 (195.47)                                     | 0.2359; -43.0985 (195.28)  | 0.2674; -0.5588 (195.14)   | 0.0264; 4.5850 (195.81)    | 0.2515; -77.6714 (195.15) |
| 11  | 0.1849; 45.5025 (194.96)                                     | 0.0027; -0.2517 (192.99)   | 0.0172; 6.2716 (192.86)    | 0.2537; 46.6443 (195.00)   | 1.0511; -45.3543 (192.28) |
| 12  | 0.5455; -256.2324 (192.40)                                   | 0.9181; -209.0616 (192.42) | 0.8324; 141.2125 (192.35)  | 0.5231; -204.8485 (192.44) | 0.0036; -1.7917 (192.04)  |
| 13  | 0.0184; 53.2617 (192.20)                                     | 0.0525; 79.2908 (192.19)   | 0.1626; 0.2452 (191.11)    | 0.0107; 26.5872 (192.15)   | 0.1646; -6.2953 (190.86)  |
| 14  | 0.7253; 135.6322 (190.76)                                    | 0.2816; 157.7922 (190.96)  | 0.2454; -178.8436 (190.87) | 0.7587; 122.4090 (190.75)  | 0.0679; 63.8924 (190.32)  |
| 15  | 0.0009; 4.9653 (188.07)                                      | 0.0035; -12.8702 (187.15)  | 0.0020; -11.7512 (187.57)  | 0.0010; 2.7501 (188.52)    | 0.0020; 12.9434 (187.47)  |
| 16  | 0.0000; -0.0092 (187.80)                                     | 0.0095; -13.3841 (186.45)  | 0.0007; -0.3766 (186.03)   | 0.0000; -0.0160 (188.03)   | 0.0003; -0.0033 (185.39)  |
| 17  | 0.0006; 0.0158 (187.58)                                      | 0.0001; 0.2326 (186.32)    | 0.0000; -0.0026 (185.54)   | 0.0005; -0.0033 (187.65)   | 0.0015; 4.1030 (184.90)   |
| 18  | 0.0000; -0.0026 (184.44)                                     | 0.0000; 0.0022 (185.32)    | 0.0196; -7.5063 (182.90)   | 0.0000; -0.0037 (184.55)   | 0.0000; 0.0148 (184.67)   |
| 19  | 0.0121; 9.9026 (183.60)                                      | 0.0000; -0.0111 (182.66)   | 0.0001; -0.0262 (182.55)   | 0.0143; 11.2492 (184.10)   | 0.0050; 4.7666 (181.93)   |
| 20  | 0.0053; 6.2964 (182.42)                                      | 0.0147; 9.9247 (182.21)    | 0.0112; 4.7009 (182.52)    | 0.0098; 7.6652 (181.83)    | 0.0000; 0.0129 (181.92)   |
| 21  | 0.1284; -0.0490 (176.58)                                     | 0.1224; -2.6155 (176.33)   | 0.0449; -6.4464 (177.49)   | 0.0053; -2.4682 (177.45)   | 0.1306; -0.5468 (176.38)  |
| 22  | 0.0230; -8.8019 (176.22)                                     | 0.0320; -15.7618 (175.91)  | 0.1227; 2.0297 (176.21)    | 0.1339; -2.4460 (176.71)   | 0.0029; -1.4658 (175.00)  |
| 23  | 0.0273; 10.5777 (175.77)                                     | 0.0502; 4.1061 (174.32)    | 0.0112; -3.2786 (173.60)   | 0.0441; 5.4890 (175.84)    | 0.0460; 10.6489 (174.30)  |
| 24  | 0.0010; -0.2272 (174.15)                                     | 0.0004; 1.3381 (173.55)    | 0.0006; -0.0337 (173.09)   | 0.0008; -0.3277 (174.07)   | 0.0136; 1.6469 (172.81)   |
| 25  | 0.0305; 7.7666 (172.35)                                      | 0.0013; 1.0383 (173.51)    | 0.0270; -1.6330 (172.52)   | 0.0023; -4.0960 (172.04)   | 0.0066; 1.8964 (172.50)   |
| 26  | 0.0008; -0.4651 (171.69)                                     | 0.0015; -2.7845 (172.03)   | 0.0005; -0.3172 (171.67)   | 0.0250; 11.8937 (171.80)   | 0.0028; -1.5777 (171.58)  |
| 27  | 0.0002; -1.2818 (170.16)                                     | 0.0026; 2.2367 (171.26)    | 0.0008; -0.2070 (169.84)   | 0.0026; -1.6671 (170.78)   | 0.0017; -0.4111 (171.20)  |
| 28  | 0.0003; 0.2009 (169.49)                                      | 0.0011; -1.8910 (169.62)   | 0.0003; -1.8313 (169.61)   | 0.0003; -1.4967 (170.55)   | 0.0007; -1.0693 (168.93)  |
| 29  | 0.0014; -2.9736 (169.15)                                     | 0.0006; -0.1420 (169.19)   | 0.0011; -1.3705 (168.18)   | 0.0005; 0.0938 (169.30)    | 0.0007; 2.5041 (168.48)   |
| 30  | 0.0012; 0.1128 (168.33)                                      | 0.0001; 0.7057 (168.75)    | 0.0011; -0.9674 (168.05)   | 0.0006; -0.9078 (168.67)   | 0.0014; 0.5583 (168.02)   |
| 31  | 0.0001; 0.4891 (168.26)                                      | 0.0015; -1.4159 (167.82)   | 0.0003; 1.4756 (166.79)    | 0.0011; -0.0736 (168.43)   | 0.0001; -0.0656 (166.54)  |
| 32  | 0.0005; 0.5941 (167.25)                                      | 0.0026; 3.9368 (167.09)    | 0.0000; 0.1031 (166.61)    | 0.0137; -2.8808 (165.95)   | 0.0004; 0.3659 (165.84)   |
| 33  | 0.0002; 0.2099 (166.11)                                      | 0.0026; -0.6276 (166.05)   | 0.0419; 1.3215 (165.66)    | 0.0312; 1.1283 (165.78)    | 0.0462; 4.3087 (165.67)   |
| 34  | 0.0421; -1.3665 (165.65)                                     | 0.0424; -1.0474 (165.82)   | 0.0002; 1.0121 (164.60)    | 0.0001; 0.9190 (165.58)    | 0.0006; -0.7311 (165.48)  |
| 35  | 0.0006; -0.0941 (164.68)                                     | 0.0006; -3.0380 (165.02)   | 0.0008; -0.3571 (163.84)   | 0.0010; -0.1631 (163.80)   | 0.0007; -1.3865 (164.73)  |
| 36  | 0.0008; 0.0229 (163.20)                                      | 0.0004; -1.7066 (164.18)   | 0.0010; -0.3945 (163.18)   | 0.0007; 0.7192 (163.46)    | 0.0006; -2.3848 (163.15)  |
| 37  | 0.0002; -0.7898 (162.80)                                     | 0.0005; 1.2231 (163.20)    | 0.0163; -3.9434 (162.16)   | 0.0003; -1.3515 (162.81)   | 0.0009; 0.5976 (162.56)   |
| 38  | 0.0017; -0.1072 (162.48)                                     | 0.0004; -0.1036 (162.85)   | 0.0071; 5.0549 (162.09)    | 0.0017; -0.0990 (162.64)   | 0.0008; 0.8734 (162.22)   |
| 39  | 0.0020; 2.3152 (161.80)                                      | 0.0192; 6.5530 (162.17)    | 0.0003; 0.0088 (162.03)    | 0.0006; 3.3433 (162.16)    | 0.0034; -0.4586 (161.86)  |
| 40  | 0.0007; -1.1655 (161.59)                                     | 0.0008; -1.9604 (162.03)   | 0.0013; -1.6959 (161.56)   | 0.0044; 0.8641 (161.99)    | 0.0010; -6.0434 (161.62)  |
| 41  | 0.0044; 6.9917 (160.87)                                      | 0.0010; 0.1119 (161.53)    | 0.0161; 7.5032 (160.83)    | 0.0013; -0.5607 (161.42)   | 0.0003; -1.5129 (161.40)  |
| 42  | 0.0062; -4.8677 (160.82)                                     | 0.0015; -0.9229 (161.16)   | 0.0124; 2.5340 (160.53)    | 0.0013; -0.7600 (160.99)   | 0.0086; 0.8175 (160.67)   |
| 43  | 0.0029; 2.0310 (160.51)                                      | 0.0055; 0.3121 (160.89)    | 0.0054; 6.6125 (159.95)    | 0.0076; -0.9816 (160.78)   | 0.0248; -2.4949 (160.60)  |
| 44  | 0.0053; -3.2231 (159.94)                                     | 0.0005; -1.1367 (160.67)   | 0.0002; -0.0604 (159.85)   | 0.0031; 7.0664 (160.28)    | 0.0003; 0.1125 (160.22)   |
| 45  | 0.0120; 3.4304 (159.92)                                      | 0.0011; 2.4771 (160.54)    | 0.0018; -6.4790 (159.65)   | 0.0066; -11.2115 (160.23)  | 0.0070; 2.8612 (159.96)   |
| 46  | 0.0058; -9.3199 (159.70)                                     | 0.0126; -0.7399 (160.06)   | 0.0057; 8.0630 (159.62)    | 0.0064; 1.1115 (160.12)    | 0.0004; -1.6486 (159.81)  |
| 47  | 0.0014; 1.6706 (159.56)                                      | 0.0072; 1.2153 (159.44)    | 0.0074; 3.2286 (158.73)    | 0.0063; -5.1264 (159.62)   | 0.0008; 0.1675 (159.17)   |
| 48  | 0.0105; 10.5140 (158.58)                                     | 0.0081; -5.6468 (158.41)   | 0.0039; -2.0304 (158.20)   | 0.0085; 10.3955 (158.60)   | 0.0095; -5.9036 (158.18)  |
| 49  | 0.0009; -1.6238 (158.23)                                     | 0.0113; 17.8137 (158.10)   | 0.0150; 24.9758 (157.68)   | 0.0057; -0.1383 (158.51)   | 0.0034; 8.5213 (157.86)   |
| 50  | 0.0046; 5.4539 (157.68)                                      | 0.0050; 7.9117 (157.67)    | 0.0202; -9.9410 (157.56)   | 0.0161; 5.9300 (158.10)    | 0.0647; -2.3305 (157.26)  |



Table S2. (Continued)

| $j$ | $f_j; R_j, 10^{-40} \text{ erg cm}^3 (\lambda_j, \text{nm})$ |                            |                            |                            |                            |
|-----|--------------------------------------------------------------|----------------------------|----------------------------|----------------------------|----------------------------|
|     | c008                                                         | c009                       | c010                       | c011                       | c013                       |
| 1   | 0.0194; -6.7187 (245.72)                                     | 0.0169; 0.7217 (245.83)    | 0.0153; 9.2280 (245.98)    | 0.0201; 8.3827 (246.30)    | 0.0181; -6.7285 (246.02)   |
| 2   | 0.0202; -4.9228 (244.38)                                     | 0.0198; -9.1524 (244.76)   | 0.0196; -1.2225 (244.46)   | 0.0227; -13.1127 (244.49)  | 0.0188; 3.0300 (244.16)    |
| 3   | 1.0972; -54.2085 (233.34)                                    | 0.8690; -196.6172 (233.40) | 1.0185; -95.7638 (233.62)  | 0.8628; 190.6939 (233.65)  | 1.0760; -118.1373 (233.57) |
| 4   | 0.0578; 16.9210 (230.55)                                     | 0.2558; 165.6116 (230.53)  | 0.0997; 97.2719 (230.88)   | 0.2616; -164.0617 (230.79) | 0.0466; 48.8127 (230.83)   |
| 5   | 0.0002; -0.0908 (221.02)                                     | 0.0005; 0.1360 (221.45)    | 0.0009; -0.5394 (220.51)   | 0.0017; 0.8668 (223.07)    | 0.0015; 0.0295 (220.87)    |
| 6   | 0.0000; -0.0076 (210.96)                                     | 0.0000; 0.0602 (212.76)    | 0.0002; 0.1227 (213.43)    | 0.0000; -0.0062 (212.87)   | 0.0000; -0.0623 (210.90)   |
| 7   | 0.0000; 0.0728 (210.59)                                      | 0.0000; 0.0144 (212.12)    | 0.0000; 0.0115 (210.50)    | 0.0000; 0.0601 (211.58)    | 0.0000; 0.0088 (210.56)    |
| 8   | 0.0000; -0.0095 (205.00)                                     | 0.0001; -0.0150 (206.97)   | 0.0001; 0.0180 (207.26)    | 0.0000; 0.0073 (206.52)    | 0.0000; 0.0246 (205.54)    |
| 9   | 0.2594; 29.3519 (196.79)                                     | 0.2599; -39.9998 (196.51)  | 0.2284; 331.4878 (196.54)  | 0.2318; 51.7055 (196.69)   | 0.2458; 29.7811 (197.12)   |
| 10  | 0.2534; -31.4531 (195.30)                                    | 0.2489; 60.0700 (195.19)   | 0.2322; -312.8116 (196.25) | 0.2688; -10.8426 (195.28)  | 0.2410; 15.5766 (195.60)   |
| 11  | 1.0707; -15.1580 (192.40)                                    | 0.9145; -237.6691 (192.29) | 0.0315; -42.2983 (193.37)  | 0.0228; 11.4183 (192.78)   | 1.1344; -120.0610 (192.51) |
| 12  | 0.0003; 0.0960 (191.88)                                      | 0.0006; -0.1120 (192.00)   | 0.9901; -55.6717 (192.75)  | 0.8256; 182.5207 (192.40)  | 0.0011; 1.6472 (191.82)    |
| 13  | 0.0531; 2.6727 (191.03)                                      | 0.0520; 22.7720 (191.00)   | 0.0443; 3.8373 (191.80)    | 0.2989; -85.7588 (191.28)  | 0.0809; 49.8330 (191.36)   |
| 14  | 0.1493; -32.3925 (190.93)                                    | 0.3520; 165.9617 (190.82)  | 0.1043; 116.1482 (191.59)  | 0.0819; -112.3491 (191.08) | 0.0044; -22.4226 (191.18)  |
| 15  | 0.0161; 12.6693 (187.12)                                     | 0.0000; 0.0006 (187.14)    | 0.0672; -19.9685 (188.44)  | 0.0007; -0.4346 (187.62)   | 0.0307; 21.2518 (188.82)   |
| 16  | 0.0023; -3.5860 (186.57)                                     | 0.0000; -0.0038 (185.38)   | 0.0004; 0.2604 (187.83)    | 0.0007; -0.0196 (186.44)   | 0.0068; -22.3367 (187.01)  |
| 17  | 0.0000; -0.0164 (186.06)                                     | 0.0001; 1.9466 (185.28)    | 0.0011; 6.2234 (187.42)    | 0.0438; -28.6391 (186.09)  | 0.0006; -0.3703 (186.48)   |
| 18  | 0.0006; 9.4514 (185.66)                                      | 0.0000; -0.0005 (183.01)   | 0.0000; 0.0081 (184.59)    | 0.0000; -0.0069 (185.58)   | 0.0000; 0.0013 (184.37)    |
| 19  | 0.0000; 0.0103 (184.65)                                      | 0.0005; -0.3624 (181.86)   | 0.0000; 0.0001 (183.43)    | 0.0000; -0.0130 (182.88)   | 0.0000; 0.0060 (182.59)    |
| 20  | 0.0000; -0.0006 (182.01)                                     | 0.0019; 2.9239 (180.96)    | 0.0131; 8.9949 (181.33)    | 0.0127; 8.3631 (182.12)    | 0.0389; 14.8326 (181.58)   |
| 21  | 0.0074; 0.9677 (177.30)                                      | 0.0097; -5.7601 (176.30)   | 0.1181; -6.7707 (177.87)   | 0.0590; -3.9774 (177.03)   | 0.1072; -16.7865 (176.24)  |
| 22  | 0.1274; 8.3565 (176.28)                                      | 0.1194; 12.6114 (176.19)   | 0.1116; -8.1734 (176.37)   | 0.1214; 0.1558 (176.36)    | 0.0097; 8.6516 (175.36)    |
| 23  | 0.0717; 9.1343 (173.94)                                      | 0.0629; -2.5242 (174.78)   | 0.0071; 4.5954 (175.74)    | 0.0192; -6.2086 (174.27)   | 0.0668; 14.1495 (174.78)   |
| 24  | 0.0002; -0.0996 (172.49)                                     | 0.0003; -0.5282 (172.94)   | 0.0029; -2.2296 (173.80)   | 0.0006; -0.1333 (172.98)   | 0.0026; -4.4983 (172.76)   |
| 25  | 0.0008; -0.7073 (172.25)                                     | 0.0006; 0.2750 (172.33)    | 0.0005; -0.0379 (173.17)   | 0.0158; -0.1123 (172.43)   | 0.0007; -0.4567 (172.50)   |
| 26  | 0.0013; -0.7503 (172.17)                                     | 0.0003; -1.2994 (171.92)   | 0.0071; 1.4159 (172.39)    | 0.0015; -0.2122 (172.13)   | 0.0029; -1.0835 (172.45)   |
| 27  | 0.0005; -0.7629 (171.42)                                     | 0.0094; 4.0746 (171.69)    | 0.0036; 0.8613 (171.97)    | 0.0021; -0.0286 (170.15)   | 0.0050; 2.9687 (170.97)    |
| 28  | 0.0002; 1.0541 (170.93)                                      | 0.0005; 1.1632 (170.17)    | 0.0003; -0.2263 (170.82)   | 0.0003; 0.0595 (169.07)    | 0.0021; -0.5676 (169.40)   |
| 29  | 0.0011; -0.7492 (167.55)                                     | 0.0004; -0.2831 (168.08)   | 0.0010; -0.6510 (168.59)   | 0.0008; 2.3773 (168.81)    | 0.0003; -0.1632 (169.19)   |
| 30  | 0.0016; 0.8174 (167.40)                                      | 0.0013; -0.0408 (167.83)   | 0.0014; -0.0849 (168.23)   | 0.0011; -0.3571 (168.22)   | 0.0013; 0.8731 (168.05)    |
| 31  | 0.0073; -0.0580 (166.23)                                     | 0.0015; -0.2805 (167.54)   | 0.0002; 1.1381 (167.47)    | 0.0008; -0.3284 (166.58)   | 0.0038; -0.0385 (167.84)   |
| 32  | 0.0011; -0.3012 (165.87)                                     | 0.0005; -0.4370 (166.55)   | 0.0045; 0.6276 (167.28)    | 0.0001; 0.3450 (166.35)    | 0.0003; -1.0399 (166.44)   |
| 33  | 0.0404; -2.8568 (165.48)                                     | 0.0013; -2.3575 (166.31)   | 0.0067; 9.4240 (166.61)    | 0.0041; -5.3846 (165.68)   | 0.0419; -1.7204 (166.09)   |
| 34  | 0.0006; 2.7972 (164.80)                                      | 0.0315; 10.9447 (165.23)   | 0.0009; 1.4603 (165.75)    | 0.0361; 6.7197 (165.54)    | 0.0022; -1.9322 (165.48)   |
| 35  | 0.0019; 0.0313 (164.07)                                      | 0.0058; -8.8288 (164.96)   | 0.0147; 24.4790 (165.42)   | 0.0019; 1.4888 (165.00)    | 0.0012; 0.4425 (165.20)    |
| 36  | 0.0002; 0.0776 (163.56)                                      | 0.0002; 0.2226 (164.81)    | 0.0300; -33.2920 (165.40)  | 0.0039; 0.5925 (164.36)    | 0.0022; -0.2731 (163.69)   |
| 37  | 0.0003; -0.1777 (163.34)                                     | 0.0008; -1.5498 (163.64)   | 0.0007; -1.5416 (164.38)   | 0.0024; 0.6710 (163.88)    | 0.0041; 0.6392 (163.13)    |
| 38  | 0.0014; -0.5202 (163.06)                                     | 0.0006; 0.4604 (162.65)    | 0.0008; -1.6707 (163.41)   | 0.0005; 0.5451 (162.65)    | 0.0009; 2.2891 (162.86)    |
| 39  | 0.0006; 0.9944 (162.26)                                      | 0.0005; 1.2853 (162.15)    | 0.0011; -1.0153 (161.62)   | 0.0105; -0.3915 (161.83)   | 0.0005; 0.7653 (162.73)    |
| 40  | 0.0002; 0.4598 (162.01)                                      | 0.0003; 0.1388 (161.85)    | 0.0021; 3.4691 (161.51)    | 0.0004; -0.9177 (161.63)   | 0.0276; -0.6468 (162.27)   |
| 41  | 0.0003; 0.1562 (161.34)                                      | 0.0005; 0.5881 (161.09)    | 0.0008; -1.6122 (161.27)   | 0.0033; 6.0072 (161.14)    | 0.0139; 3.9019 (161.00)    |
| 42  | 0.0085; -1.2798 (160.83)                                     | 0.0002; -0.1014 (161.03)   | 0.0054; 0.5514 (160.92)    | 0.0004; -2.2436 (161.05)   | 0.0008; 0.5164 (160.89)    |
| 43  | 0.0150; -0.8213 (160.46)                                     | 0.0003; 0.0510 (160.68)    | 0.0002; -0.5678 (160.57)   | 0.0123; 3.8017 (160.87)    | 0.0124; -0.0339 (160.47)   |
| 44  | 0.0154; 6.5381 (159.93)                                      | 0.0059; -2.6846 (160.09)   | 0.0027; 1.8983 (160.39)    | 0.0235; 2.8460 (160.42)    | 0.0004; 3.0141 (160.30)    |
| 45  | 0.0050; -1.0205 (159.45)                                     | 0.0053; 4.1125 (159.90)    | 0.0009; -3.1371 (160.37)   | 0.0010; 1.4388 (160.18)    | 0.0082; 2.5848 (160.14)    |
| 46  | 0.0022; -0.3266 (159.17)                                     | 0.0269; 10.6528 (159.01)   | 0.0046; 0.4581 (160.17)    | 0.0001; 0.0926 (159.68)    | 0.0022; 1.4413 (159.44)    |
| 47  | 0.0008; 0.0510 (159.03)                                      | 0.0010; -2.2663 (158.90)   | 0.0004; -0.4976 (158.63)   | 0.0036; -5.0587 (159.42)   | 0.0043; 4.8502 (158.71)    |
| 48  | 0.0070; 4.4129 (158.21)                                      | 0.0036; 0.9433 (158.00)    | 0.0040; -1.7832 (158.48)   | 0.0147; -15.4591 (158.34)  | 0.0107; 8.0836 (158.29)    |
| 49  | 0.0037; 9.5229 (157.81)                                      | 0.0024; 4.0574 (157.63)    | 0.0310; -19.1087 (158.34)  | 0.0006; 1.7707 (158.29)    | 0.0110; 18.3779 (158.08)   |
| 50  | 0.0638; -1.9408 (157.31)                                     | 0.0304; -26.6348 (157.04)  | 0.0231; -4.3723 (158.12)   | 0.0195; 9.2181 (158.24)    | 0.0043; 3.6925 (157.71)    |

Table S2. (Continued)

| $j$ | c015                       | c016                       | $f_j; R_j, 10^{-40} \text{ erg cm}^3 (\lambda_j, \text{nm})$ | c017                      | c018                       | c020 |
|-----|----------------------------|----------------------------|--------------------------------------------------------------|---------------------------|----------------------------|------|
| 1   | 0.0157; 16.9946 (247.47)   | 0.0206; -7.9260 (245.87)   | 0.0174; -11.5370 (246.75)                                    | 0.0190; -9.9121 (245.60)  | 0.0153; -5.6494 (247.36)   |      |
| 2   | 0.0242; -2.1943 (244.70)   | 0.0220; 14.6297 (244.65)   | 0.0220; -9.5637 (244.46)                                     | 0.0202; -4.2079 (244.43)  | 0.0059; 6.1839 (244.80)    |      |
| 3   | 0.0591; -11.3255 (236.15)  | 0.7886; 196.0143 (233.61)  | 0.5045; 102.3680 (233.90)                                    | 1.1313; -51.7539 (233.41) | 0.0091; 14.7539 (241.93)   |      |
| 4   | 0.0015; 3.1673 (234.08)    | 0.3211; -155.6097 (230.39) | 0.5429; -105.3433 (230.41)                                   | 0.0276; 12.8126 (230.75)  | 0.0686; -79.4529 (236.85)  |      |
| 5   | 0.7004; -51.9813 (230.34)  | 0.0018; 0.3853 (222.67)    | 0.0008; -0.2333 (227.95)                                     | 0.0001; -0.0359 (219.93)  | 0.1130; -417.7516 (233.83) |      |
| 6   | 0.0092; 2.4527 (227.48)    | 0.0000; 0.0097 (212.67)    | 0.0000; -0.0010 (216.91)                                     | 0.0000; 0.0529 (211.93)   | 0.6456; 523.3167 (230.27)  |      |
| 7   | 0.0570; -12.3425 (224.93)  | 0.0000; 0.0457 (211.54)    | 0.0000; 0.0027 (212.76)                                      | 0.0000; -0.0060 (210.12)  | 0.0052; 3.0251 (217.23)    |      |
| 8   | 0.0069; 0.7378 (222.72)    | 0.0000; 0.0047 (206.41)    | 0.0000; -0.0009 (208.62)                                     | 0.0000; 0.0032 (205.69)   | 0.0040; -3.7640 (212.25)   |      |
| 9   | 0.0690; -64.2282 (204.41)  | 0.2384; -2.0843 (196.96)   | 0.2241; -47.4280 (197.04)                                    | 0.2526; 51.3945 (196.65)  | 0.0266; -9.5598 (208.34)   |      |
| 10  | 0.0238; -20.6406 (202.15)  | 0.2808; -44.0589 (195.04)  | 0.0001; 0.1632 (195.86)                                      | 0.2481; -74.2146 (195.72) | 0.0289; 0.2110 (203.50)    |      |
| 11  | 0.0335; 80.1551 (201.74)   | 0.0207; -13.3952 (192.77)  | 0.2627; -69.8137 (194.79)                                    | 1.1799; -4.1088 (192.42)  | 0.1415; 129.1586 (198.81)  |      |
| 12  | 0.1486; 59.7817 (198.42)   | 0.7328; 228.8078 (192.57)  | 0.5620; 269.7194 (192.47)                                    | 0.0004; -3.6259 (191.69)  | 0.1513; -196.0630 (196.98) |      |
| 13  | 0.0296; 112.6334 (195.91)  | 0.3676; -180.1192 (190.81) | 0.0722; 39.0820 (191.37)                                     | 0.0024; -0.9294 (191.45)  | 0.1505; -82.9333 (194.62)  |      |
| 14  | 0.0406; -12.8379 (195.76)  | 0.1713; 29.1134 (190.64)   | 0.6479; -231.4680 (190.63)                                   | 0.0607; -20.7422 (191.29) | 0.2074; -145.2862 (193.11) |      |
| 15  | 0.1707; -210.1137 (194.28) | 0.0006; 0.1792 (186.55)    | 0.0001; -0.0389 (188.28)                                     | 0.0235; 12.4742 (187.74)  | 0.3500; 174.4118 (192.58)  |      |
| 16  | 0.7006; 46.7071 (191.36)   | 0.0022; -2.2108 (186.21)   | 0.0018; -12.3761 (187.91)                                    | 0.0000; 0.0089 (186.98)   | 0.2339; 119.2010 (190.91)  |      |
| 17  | 0.3021; 96.2399 (190.33)   | 0.0001; -1.4917 (186.07)   | 0.0000; -0.0147 (187.36)                                     | 0.0003; 4.2141 (185.76)   | 0.0088; -13.1835 (190.62)  |      |
| 18  | 0.0280; -42.2341 (189.00)  | 0.0000; 0.0001 (185.70)    | 0.0297; 13.3398 (186.25)                                     | 0.0041; 8.5315 (185.57)   | 0.1959; 29.6984 (188.59)   |      |
| 19  | 0.0333; -17.9255 (184.62)  | 0.0000; -0.0008 (182.90)   | 0.0000; -0.0097 (184.65)                                     | 0.0000; 0.0083 (184.35)   | 0.0803; -44.4813 (186.42)  |      |
| 20  | 0.0405; 27.2373 (182.30)   | 0.0049; 5.8516 (182.42)    | 0.0150; 10.2916 (183.69)                                     | 0.0000; -0.0055 (182.44)  | 0.0982; 43.6603 (184.17)   |      |
| 21  | 0.0166; -10.9241 (181.48)  | 0.0001; -0.0895 (179.55)   | 0.0028; -0.7628 (176.64)                                     | 0.0338; 4.8146 (176.73)   | 0.0236; 35.8005 (182.39)   |      |
| 22  | 0.1299; 42.4329 (178.30)   | 0.1387; -12.4824 (176.86)  | 0.1328; 7.8910 (176.43)                                      | 0.1273; 1.4423 (176.09)   | 0.0363; 19.2307 (178.63)   |      |
| 23  | 0.0057; -1.3026 (177.11)   | 0.0258; 1.5003 (174.42)    | 0.0010; -0.0106 (175.20)                                     | 0.0645; 7.8357 (174.43)   | 0.1000; -32.7320 (177.84)  |      |
| 24  | 0.0965; -50.5745 (176.40)  | 0.0425; 3.2792 (173.18)    | 0.0021; -0.0354 (174.18)                                     | 0.0007; 0.6475 (172.87)   | 0.0124; 9.0128 (177.09)    |      |
| 25  | 0.0019; -2.3551 (173.66)   | 0.0000; -0.0998 (172.99)   | 0.0453; 5.9326 (173.44)                                      | 0.0004; -0.1485 (172.32)  | 0.0025; 1.3863 (173.26)    |      |
| 26  | 0.0001; -0.1818 (173.34)   | 0.0006; 0.0520 (172.43)    | 0.0013; -2.0167 (172.15)                                     | 0.0006; -0.1450 (172.07)  | 0.0063; -1.1226 (172.20)   |      |
| 27  | 0.0046; 0.3765 (171.74)    | 0.0010; 1.5268 (171.32)    | 0.0001; -0.0984 (171.01)                                     | 0.0012; 2.3862 (170.73)   | 0.0033; -4.7080 (171.42)   |      |
| 28  | 0.0022; 3.5980 (170.32)    | 0.0013; 0.0000 (169.55)    | 0.0077; 2.8497 (170.46)                                      | 0.0004; 0.9741 (169.82)   | 0.0039; -0.1376 (171.11)   |      |
| 29  | 0.0566; 13.2788 (169.41)   | 0.0004; -0.2235 (168.61)   | 0.0006; -2.3178 (170.33)                                     | 0.0008; -0.5047 (168.49)  | 0.0250; -1.6672 (170.82)   |      |
| 30  | 0.0022; 6.0893 (168.60)    | 0.0013; 0.1776 (167.59)    | 0.0003; -0.4420 (169.56)                                     | 0.0013; 0.1545 (167.49)   | 0.0030; -4.0087 (169.72)   |      |
| 31  | 0.0237; -14.2409 (168.32)  | 0.0106; -5.8467 (166.65)   | 0.0011; -0.9478 (168.16)                                     | 0.0012; -0.9237 (167.36)  | 0.0027; 1.6242 (168.76)    |      |
| 32  | 0.0146; -2.9406 (167.88)   | 0.0008; 0.3020 (166.01)    | 0.0001; 0.9255 (166.72)                                      | 0.0362; -1.6389 (165.49)  | 0.0002; -0.2989 (167.75)   |      |
| 33  | 0.0362; -5.6644 (167.25)   | 0.0285; 5.1279 (165.88)    | 0.0455; -4.1941 (165.98)                                     | 0.0010; -1.0134 (165.21)  | 0.0007; 0.0663 (167.23)    |      |
| 34  | 0.0086; -6.6135 (166.68)   | 0.0009; 2.3096 (165.41)    | 0.0011; 2.4021 (165.95)                                      | 0.0019; 0.5139 (165.13)   | 0.0143; 0.5751 (166.50)    |      |
| 35  | 0.0196; 0.5666 (166.15)    | 0.0089; -5.1420 (164.81)   | 0.0003; 0.5727 (164.82)                                      | 0.0063; -1.2913 (164.89)  | 0.0011; -0.4309 (165.89)   |      |
| 36  | 0.0074; 0.4769 (165.33)    | 0.0010; 0.6217 (164.06)    | 0.0136; -7.4550 (163.55)                                     | 0.0011; 0.1498 (164.79)   | 0.0015; 2.6679 (165.41)    |      |
| 37  | 0.0032; -1.1972 (164.60)   | 0.0004; 0.5454 (163.72)    | 0.0004; 0.1101 (163.44)                                      | 0.0036; 4.0195 (163.71)   | 0.0014; -0.2464 (165.03)   |      |
| 38  | 0.0033; 1.8153 (164.34)    | 0.0002; 0.8060 (162.66)    | 0.0047; -3.6219 (163.30)                                     | 0.0018; -2.7487 (163.10)  | 0.0075; -13.1022 (164.56)  |      |
| 39  | 0.0070; 2.1063 (163.86)    | 0.0001; 0.4656 (162.23)    | 0.0017; -3.4321 (162.65)                                     | 0.0004; 2.1454 (162.72)   | 0.0110; 31.4662 (163.92)   |      |
| 40  | 0.0030; -2.5324 (163.58)   | 0.0042; -1.0286 (161.41)   | 0.0019; 0.6713 (162.44)                                      | 0.0003; 0.7315 (161.84)   | 0.0057; -1.3869 (163.54)   |      |
| 41  | 0.0048; 0.8946 (163.17)    | 0.0018; 0.4397 (160.92)    | 0.0383; 13.1535 (162.13)                                     | 0.0008; 1.6027 (161.30)   | 0.0363; -26.0986 (163.39)  |      |
| 42  | 0.0114; -4.0690 (162.95)   | 0.0003; 0.2725 (160.56)    | 0.0007; -4.4306 (161.94)                                     | 0.0004; -1.4908 (161.01)  | 0.0258; 4.4997 (163.22)    |      |
| 43  | 0.0026; -5.8629 (162.34)   | 0.0010; -1.7636 (160.44)   | 0.0038; 3.1932 (161.29)                                      | 0.0008; 0.6432 (160.96)   | 0.0136; -4.0319 (162.94)   |      |
| 44  | 0.0011; -0.2889 (161.64)   | 0.0164; 0.8160 (159.99)    | 0.0178; -4.7208 (161.00)                                     | 0.0282; 5.4727 (159.59)   | 0.0536; 37.7889 (162.65)   |      |
| 45  | 0.0041; 2.2291 (161.42)    | 0.0013; 0.1702 (159.43)    | 0.0024; -4.0222 (160.81)                                     | 0.0025; 2.8353 (158.89)   | 0.0019; -1.0141 (161.99)   |      |
| 46  | 0.0115; 5.1053 (160.87)    | 0.0000; -0.0241 (159.07)   | 0.0011; 2.1277 (160.40)                                      | 0.0031; -0.5631 (158.62)  | 0.0034; -4.4361 (161.58)   |      |
| 47  | 0.0297; -6.3385 (160.24)   | 0.0400; 1.8540 (158.24)    | 0.0048; 3.2683 (158.76)                                      | 0.0054; 1.3974 (158.07)   | 0.0129; 0.3239 (160.80)    |      |
| 48  | 0.0301; -1.4815 (160.14)   | 0.0055; -6.6616 (158.13)   | 0.0006; -0.7684 (158.29)                                     | 0.0028; 1.8482 (158.00)   | 0.0124; 28.4434 (160.31)   |      |
| 49  | 0.0294; -11.7192 (159.74)  | 0.0001; -0.4197 (157.62)   | 0.0086; -11.7621 (157.97)                                    | 0.0362; 21.1529 (157.25)  | 0.0599; -36.6142 (160.26)  |      |
| 50  | 0.0017; -4.3663 (159.48)   | 0.0481; -41.0587 (157.34)  | 0.0153; 25.2191 (157.95)                                     | 0.0678; 13.0780 (157.17)  | 0.0010; 3.9020 (160.04)    |      |

Table S2. (Continued)

| $j$ | c021                       | c022                       | $f_j; R_j, 10^{-40} \text{ erg cm}^3 (\lambda_j, \text{nm})$ | c024                       | c026                       |
|-----|----------------------------|----------------------------|--------------------------------------------------------------|----------------------------|----------------------------|
| 1   | 0.0174; -5.5212 (246.29)   | 0.0178; -0.1058 (244.44)   | 0.0217; -4.2564 (246.82)                                     | 0.0154; -7.8307 (245.50)   | 0.0286; 6.0104 (249.48)    |
| 2   | 0.0110; 8.2566 (243.20)    | 0.0116; -3.3649 (242.64)   | 0.0228; -7.1039 (244.42)                                     | 0.0176; 6.5870 (244.42)    | 0.0187; 6.0696 (244.45)    |
| 3   | 0.3426; -662.7031 (232.98) | 0.6294; 33.7415 (232.87)   | 0.7778; 41.7299 (233.56)                                     | 0.1799; 343.8345 (233.92)  | 0.0523; 261.3872 (236.68)  |
| 4   | 0.2520; 217.8791 (232.38)  | 0.2664; -89.4919 (227.65)  | 0.3343; -38.5211 (230.58)                                    | 0.6362; -251.7578 (231.61) | 0.1523; -33.6544 (234.86)  |
| 5   | 0.3599; 326.9878 (229.97)  | 0.0000; 0.0223 (216.70)    | 0.0019; 0.0655 (224.94)                                      | 0.0607; -24.2117 (228.42)  | 0.4307; -188.3857 (231.84) |
| 6   | 0.0022; 1.3444 (221.20)    | 0.0001; 0.0936 (212.73)    | 0.0000; -0.0019 (214.41)                                     | 0.0043; -1.0000 (218.99)   | 0.1741; -74.5758 (230.02)  |
| 7   | 0.0017; 0.0836 (214.06)    | 0.0001; 0.0155 (209.03)    | 0.0000; 0.0059 (209.10)                                      | 0.0028; -0.6446 (217.57)   | 0.0010; 2.7229 (226.05)    |
| 8   | 0.0004; 0.1009 (208.98)    | 0.0001; -0.0637 (206.47)   | 0.0000; 0.0079 (205.43)                                      | 0.0009; 0.6594 (214.71)    | 0.0076; 5.1461 (222.18)    |
| 9   | 0.0560; -23.5988 (198.56)  | 0.2667; 49.5948 (196.98)   | 0.2571; 33.5675 (196.93)                                     | 0.0223; 12.2132 (200.34)   | 0.0512; -14.1535 (203.21)  |
| 10  | 0.2873; 50.6335 (197.82)   | 0.2546; -21.1455 (195.65)  | 0.2635; -91.2437 (194.82)                                    | 0.2699; 124.0221 (197.69)  | 0.0469; -52.7362 (201.51)  |
| 11  | 0.1333; 55.1054 (195.09)   | 0.0002; 0.1263 (192.95)    | 0.0072; -4.7489 (193.42)                                     | 0.2059; -317.2571 (196.73) | 0.0270; -34.6166 (200.14)  |
| 12  | 0.4244; -435.7930 (193.38) | 0.8239; 103.7515 (192.61)  | 0.7170; 129.2399 (192.34)                                    | 0.1430; 272.5791 (193.26)  | 0.0965; 92.9995 (198.66)   |
| 13  | 0.0261; 12.1090 (192.24)   | 0.2567; -185.1299 (191.65) | 0.0209; 70.0941 (192.07)                                     | 0.2441; -35.2608 (192.38)  | 0.2356; 52.3844 (195.68)   |
| 14  | 0.0304; -54.9450 (191.45)  | 0.0001; -0.0472 (187.69)   | 0.5451; -136.6548 (190.64)                                   | 0.0467; 120.3107 (192.06)  | 0.1061; 189.9109 (193.91)  |
| 15  | 0.1004; 34.7870 (191.11)   | 0.0509; 69.4524 (186.56)   | 0.0016; -9.2600 (187.57)                                     | 0.5561; -283.2886 (191.44) | 0.3704; -249.8142 (193.77) |
| 16  | 0.6589; 371.0754 (190.90)  | 0.0069; 14.2460 (186.49)   | 0.0000; -0.0012 (186.03)                                     | 0.1434; 119.2461 (190.15)  | 0.0527; 170.6421 (192.11)  |
| 17  | 0.0192; 14.1303 (188.33)   | 0.0014; -13.9357 (185.43)  | 0.0010; 1.3153 (185.10)                                      | 0.0746; -7.6937 (189.21)   | 0.4673; -17.9469 (189.99)  |
| 18  | 0.0003; 0.7192 (187.81)    | 0.0000; -0.0085 (184.95)   | 0.0002; -0.0456 (184.80)                                     | 0.0038; -14.1960 (187.81)  | 0.1095; -119.8845 (189.31) |
| 19  | 0.0098; 22.7733 (185.59)   | 0.0000; 0.0018 (184.93)    | 0.0123; 8.3110 (182.94)                                      | 0.0010; -0.9023 (186.14)   | 0.0095; 4.4048 (184.30)    |
| 20  | 0.0078; -9.0992 (181.63)   | 0.0006; 1.8214 (184.77)    | 0.0000; -0.0034 (182.24)                                     | 0.0005; -1.5802 (184.06)   | 0.0035; -2.2818 (182.37)   |
| 21  | 0.0380; -4.9165 (181.22)   | 0.0204; -17.0288 (180.28)  | 0.0120; -3.7022 (177.38)                                     | 0.0263; -30.5522 (178.75)  | 0.0876; 27.0050 (181.24)   |
| 22  | 0.0777; -7.5245 (179.67)   | 0.1277; 3.6719 (176.35)    | 0.1243; 5.1928 (176.31)                                      | 0.0376; 19.9104 (178.20)   | 0.0658; 31.9253 (178.94)   |
| 23  | 0.0543; 5.5887 (176.90)    | 0.0025; -2.5129 (174.23)   | 0.0193; -0.7150 (174.61)                                     | 0.1461; 47.1439 (177.81)   | 0.1391; -54.1538 (178.54)  |
| 24  | 0.0006; -1.7276 (174.96)   | 0.0004; 0.7493 (172.65)    | 0.0086; 0.4454 (174.46)                                      | 0.0139; 1.1131 (176.68)    | 0.0031; 0.2480 (175.14)    |
| 25  | 0.0008; 1.5093 (173.73)    | 0.0037; 1.6213 (172.10)    | 0.0237; 3.2428 (173.34)                                      | 0.0109; -6.3136 (174.67)   | 0.0089; -9.2080 (171.92)   |
| 26  | 0.0435; -0.2759 (172.88)   | 0.0003; 0.9429 (171.39)    | 0.0010; 0.4391 (171.50)                                      | 0.0016; -1.2856 (171.15)   | 0.0050; 3.4413 (170.28)    |
| 27  | 0.0073; 2.2530 (172.02)    | 0.0008; -1.8089 (171.06)   | 0.0078; -6.6975 (171.31)                                     | 0.0391; -2.3801 (170.68)   | 0.0040; -2.4572 (169.98)   |
| 28  | 0.0061; -4.7347 (170.28)   | 0.0305; 9.4993 (169.46)    | 0.0002; 0.1777 (170.65)                                      | 0.0068; -1.4459 (169.87)   | 0.0038; 3.7106 (169.87)    |
| 29  | 0.0173; -4.7895 (169.62)   | 0.0042; -3.1508 (169.04)   | 0.0014; 2.8998 (168.87)                                      | 0.0015; 1.4549 (169.44)    | 0.0463; -4.2226 (169.26)   |
| 30  | 0.0008; 1.2187 (169.41)    | 0.0018; -0.4662 (167.20)   | 0.0004; 0.0884 (168.45)                                      | 0.0004; -1.9850 (168.84)   | 0.0017; 5.3720 (168.72)    |
| 31  | 0.0003; 1.6673 (168.95)    | 0.0327; -10.2522 (167.08)  | 0.0012; -0.7658 (167.93)                                     | 0.0008; -0.5113 (168.01)   | 0.0085; -39.4858 (167.37)  |
| 32  | 0.0516; -8.4306 (166.54)   | 0.0054; 3.4782 (166.63)    | 0.0002; 0.8294 (167.05)                                      | 0.0009; 1.5951 (167.84)    | 0.0028; -6.1730 (167.35)   |
| 33  | 0.0144; -0.8448 (165.33)   | 0.0171; 15.1119 (166.45)   | 0.0009; -1.2305 (166.28)                                     | 0.0161; 12.8378 (166.55)   | 0.0352; 27.2237 (166.77)   |
| 34  | 0.0129; -2.8574 (165.23)   | 0.0145; 25.7509 (166.05)   | 0.0447; 0.1376 (165.80)                                      | 0.0465; -13.6600 (166.36)  | 0.0020; -4.0582 (166.26)   |
| 35  | 0.0023; -2.4599 (164.84)   | 0.0305; -6.4433 (165.61)   | 0.0008; 1.1940 (162.90)                                      | 0.0746; -16.3697 (165.85)  | 0.0112; -9.5570 (165.38)   |
| 36  | 0.0003; 0.9813 (164.54)    | 0.0253; 2.4077 (165.14)    | 0.0006; 3.6747 (162.58)                                      | 0.0045; 1.3102 (165.66)    | 0.0038; -3.0850 (165.18)   |
| 37  | 0.0013; 1.7580 (164.25)    | 0.0117; 9.3910 (164.67)    | 0.0034; -4.9865 (162.46)                                     | 0.0053; 2.2901 (165.30)    | 0.0283; 1.5569 (165.05)    |
| 38  | 0.0014; -2.2175 (164.07)   | 0.0026; -3.2669 (164.20)   | 0.0056; 6.0540 (161.91)                                      | 0.0018; 3.9523 (164.90)    | 0.0160; 1.1471 (164.98)    |
| 39  | 0.1128; 5.4080 (162.89)    | 0.0003; -0.3561 (164.04)   | 0.0067; -0.4606 (161.88)                                     | 0.0072; 1.3373 (164.86)    | 0.0008; 4.0012 (164.32)    |
| 40  | 0.0003; -1.3186 (162.52)   | 0.0712; 48.8470 (163.47)   | 0.0068; -2.3127 (161.81)                                     | 0.0039; 0.1350 (162.44)    | 0.0012; 0.6610 (163.79)    |
| 41  | 0.0006; 1.9644 (162.44)    | 0.0451; -29.6525 (162.61)  | 0.0002; 0.0662 (161.66)                                      | 0.0123; -12.1185 (162.29)  | 0.0077; 7.1462 (162.75)    |
| 42  | 0.0086; 4.0336 (161.54)    | 0.0408; -28.2519 (162.45)  | 0.0014; -3.1866 (160.64)                                     | 0.0110; 10.8937 (162.13)   | 0.0057; -4.5899 (162.13)   |
| 43  | 0.0087; -2.6949 (161.38)   | 0.0134; 5.3207 (161.58)    | 0.0006; 0.1968 (160.54)                                      | 0.0339; -6.5732 (161.72)   | 0.0056; -2.5884 (161.86)   |
| 44  | 0.0007; 1.5633 (160.85)    | 0.0034; 0.4515 (161.06)    | 0.0027; 1.1512 (160.47)                                      | 0.0017; 0.5375 (161.21)    | 0.0073; -1.7200 (161.73)   |
| 45  | 0.0007; 0.4155 (160.72)    | 0.0079; 1.3435 (160.76)    | 0.0402; -2.2551 (159.04)                                     | 0.0030; -0.9770 (160.97)   | 0.0048; 3.6145 (161.55)    |
| 46  | 0.0003; 0.1935 (160.41)    | 0.0034; -1.8884 (159.47)   | 0.0087; -3.9482 (158.42)                                     | 0.0006; -1.2957 (160.76)   | 0.0078; 0.2899 (161.47)    |
| 47  | 0.0002; 0.1866 (160.31)    | 0.0109; 2.8779 (159.38)    | 0.0094; 6.7443 (158.26)                                      | 0.0007; -0.4659 (160.50)   | 0.0019; -1.9869 (160.98)   |
| 48  | 0.0255; 9.6723 (159.54)    | 0.0038; -2.7581 (158.63)   | 0.0102; -2.1945 (157.76)                                     | 0.0041; -0.2081 (159.97)   | 0.0124; -12.3929 (160.94)  |
| 49  | 0.0006; -2.5434 (159.33)   | 0.0023; 8.7921 (158.41)    | 0.0204; 15.2257 (157.73)                                     | 0.0053; 0.3679 (159.89)    | 0.0016; -0.5470 (160.58)   |
| 50  | 0.0136; 5.4344 (158.68)    | 0.0009; 3.3194 (158.23)    | 0.0047; 15.3601 (157.41)                                     | 0.0022; 3.9685 (159.53)    | 0.0027; -6.6076 (160.34)   |

Table S2. (Continued)

| $j$ | $f_j; R_j, 10^{-40} \text{ erg cm}^3 (\lambda_j, \text{nm})$ |                            |                            |                           |                            |
|-----|--------------------------------------------------------------|----------------------------|----------------------------|---------------------------|----------------------------|
|     | c028                                                         | c031                       | c032                       | c034                      | c035                       |
| 1   | 0.0215; 2.6760 (246.90)                                      | 0.0191; 4.0032 (246.28)    | 0.0156; 19.0996 (247.56)   | 0.0178; -1.3135 (244.46)  | 0.0207; 3.0865 (246.68)    |
| 2   | 0.0185; 4.6136 (244.11)                                      | 0.0088; -3.0799 (242.37)   | 0.0258; -3.5076 (244.65)   | 0.0109; 2.4540 (242.58)   | 0.0216; 0.5535 (244.30)    |
| 3   | 0.5709; 19.0233 (233.37)                                     | 0.4894; 475.4519 (232.14)  | 0.0574; -12.1670 (236.32)  | 0.6300; -86.9151 (232.80) | 1.0277; -24.4642 (233.25)  |
| 4   | 0.4978; -22.3281 (230.52)                                    | 0.5149; -308.0613 (229.61) | 0.0018; 3.5287 (234.06)    | 0.2407; 85.2932 (227.11)  | 0.1175; 2.9947 (230.49)    |
| 5   | 0.0178; -1.0612 (226.65)                                     | 0.0026; -0.1257 (225.47)   | 0.7123; -51.5841 (230.50)  | 0.0003; 0.0041 (216.65)   | 0.0024; -0.0323 (223.28)   |
| 6   | 0.0000; 0.0026 (216.24)                                      | 0.0003; -0.3540 (217.55)   | 0.0115; 1.6606 (227.82)    | 0.0002; -0.0160 (213.98)  | 0.0000; -0.0006 (212.87)   |
| 7   | 0.0001; -0.0374 (209.71)                                     | 0.0002; 0.0871 (210.90)    | 0.0597; -12.9476 (225.15)  | 0.0000; 0.0375 (213.78)   | 0.0000; 0.0489 (207.90)    |
| 8   | 0.0000; 0.0034 (206.27)                                      | 0.0000; 0.0000 (205.64)    | 0.0088; 0.6458 (222.46)    | 0.0001; 0.0764 (203.56)   | 0.0000; 0.0020 (204.16)    |
| 9   | 0.2500; -30.0606 (196.80)                                    | 0.3440; -19.0819 (196.36)  | 0.0676; -71.4614 (204.56)  | 0.2327; 35.2949 (196.80)  | 0.2414; 2.1899 (196.79)    |
| 10  | 0.1487; -4.2813 (195.21)                                     | 0.1698; -27.6647 (195.35)  | 0.0229; -13.2999 (202.60)  | 0.2066; -48.9604 (195.51) | 0.2703; 30.7954 (194.76)   |
| 11  | 0.1201; 2.9068 (194.15)                                      | 0.0133; -0.3325 (194.19)   | 0.0365; 75.9740 (202.07)   | 0.4851; -12.6113 (192.99) | 0.0517; 16.2133 (192.44)   |
| 12  | 0.4893; 72.1231 (192.35)                                     | 0.5416; 586.0368 (192.57)  | 0.1500; 62.5141 (198.47)   | 0.4765; 69.1118 (192.01)  | 0.9008; -128.8089 (192.24) |
| 13  | 0.1021; -218.1569 (192.13)                                   | 0.6382; -525.7577 (191.11) | 0.0099; 62.5877 (196.01)   | 0.0001; -0.0284 (190.39)  | 0.0002; 0.9809 (191.84)    |
| 14  | 0.7098; 146.2394 (190.54)                                    | 0.0424; 40.3248 (190.96)   | 0.0568; 30.4992 (195.84)   | 0.0004; -0.3696 (189.75)  | 0.3478; 59.4751 (190.60)   |
| 15  | 0.0037; 16.1345 (187.99)                                     | 0.0082; 3.9795 (189.19)    | 0.1734; -183.6744 (194.43) | 0.0001; -0.0955 (188.45)  | 0.0009; 2.7532 (187.29)    |
| 16  | 0.0000; 0.0218 (187.28)                                      | 0.0008; 0.1294 (188.51)    | 0.7448; 35.2199 (191.38)   | 0.1319; -95.4568 (187.78) | 0.0004; 0.0745 (186.31)    |
| 17  | 0.0017; 0.4100 (185.50)                                      | 0.0358; -22.3697 (188.46)  | 0.2400; 91.9089 (190.27)   | 0.0103; -1.6740 (187.66)  | 0.0000; 0.0012 (185.05)    |
| 18  | 0.0012; -0.1282 (183.60)                                     | 0.0000; 0.0161 (185.22)    | 0.0539; -48.1431 (189.52)  | 0.0072; -9.0871 (183.30)  | 0.0006; 0.0729 (184.05)    |
| 19  | 0.0000; 0.0217 (183.17)                                      | 0.0331; -51.4203 (183.79)  | 0.0280; -18.6574 (184.39)  | 0.0149; 11.5133 (182.22)  | 0.0073; 6.4204 (182.05)    |
| 20  | 0.0022; 3.4462 (182.04)                                      | 0.0112; 12.4256 (182.34)   | 0.0106; 8.8942 (181.60)    | 0.0000; -0.0296 (181.84)  | 0.0000; 0.0029 (181.38)    |
| 21  | 0.1482; 19.9402 (176.87)                                     | 0.0396; -5.8580 (178.59)   | 0.0729; 13.4436 (181.38)   | 0.0035; 13.7752 (178.39)  | 0.1289; 1.9649 (176.32)    |
| 22  | 0.0040; -14.6917 (176.52)                                    | 0.0496; 26.7929 (177.75)   | 0.1100; 39.9649 (178.09)   | 0.0585; 2.6940 (177.00)   | 0.0003; 0.1565 (175.26)    |
| 23  | 0.0026; 1.4416 (176.06)                                      | 0.0251; -8.2377 (177.09)   | 0.0039; -0.4554 (177.11)   | 0.0627; -8.7099 (175.74)  | 0.0062; 0.9869 (174.34)    |
| 24  | 0.0008; 0.2392 (174.78)                                      | 0.0056; 1.6961 (173.52)    | 0.0999; -51.5148 (176.37)  | 0.0124; 8.2981 (174.89)   | 0.0005; -0.2414 (174.14)   |
| 25  | 0.0452; -5.4059 (172.55)                                     | 0.0046; 0.4901 (172.94)    | 0.0028; -3.2407 (173.83)   | 0.0008; -0.3322 (171.96)  | 0.0554; -1.2837 (173.05)   |
| 26  | 0.0019; -1.5531 (171.35)                                     | 0.0317; -0.3541 (172.44)   | 0.0001; -0.1043 (173.39)   | 0.0008; -0.0083 (170.98)  | 0.0016; -1.2586 (171.65)   |
| 27  | 0.0003; 0.2938 (169.51)                                      | 0.0009; -0.8658 (170.52)   | 0.0017; 0.1006 (172.02)    | 0.0383; -4.3176 (170.23)  | 0.0007; 1.2866 (170.64)    |
| 28  | 0.0012; 2.2772 (169.09)                                      | 0.0025; -1.6165 (170.37)   | 0.0002; 0.1987 (170.25)    | 0.0027; -1.6866 (169.25)  | 0.0008; 0.3562 (169.89)    |
| 29  | 0.0009; -1.0715 (168.88)                                     | 0.0060; 1.9628 (168.91)    | 0.0599; 19.1295 (169.56)   | 0.0129; 5.1177 (169.18)   | 0.0005; -0.5789 (168.65)   |
| 30  | 0.0014; 1.1326 (168.25)                                      | 0.0011; 0.4972 (168.00)    | 0.0002; 1.7722 (168.96)    | 0.0012; -0.8277 (168.08)  | 0.0016; -0.1082 (167.79)   |
| 31  | 0.0003; 0.1334 (167.62)                                      | 0.0007; -0.4955 (167.65)   | 0.0276; -4.8679 (168.77)   | 0.0724; -29.8985 (167.59) | 0.0006; 0.3183 (167.65)    |
| 32  | 0.0001; -0.3144 (166.22)                                     | 0.0163; 0.4777 (166.04)    | 0.0213; -18.0777 (167.99)  | 0.0005; 3.0449 (166.84)   | 0.0015; 1.1039 (167.45)    |
| 33  | 0.0464; -0.6300 (165.93)                                     | 0.0001; -1.6150 (165.28)   | 0.0142; -5.2604 (167.72)   | 0.0042; -8.2568 (166.51)  | 0.0003; 0.3709 (166.28)    |
| 34  | 0.0006; -0.9208 (165.77)                                     | 0.0353; -20.7702 (164.79)  | 0.0263; 1.7581 (167.39)    | 0.0368; -0.4074 (165.73)  | 0.0007; -2.5016 (166.12)   |
| 35  | 0.0002; 0.5713 (163.51)                                      | 0.0074; -0.7412 (164.57)   | 0.0130; -9.6690 (166.59)   | 0.0356; 33.0864 (165.33)  | 0.0463; 2.0519 (165.68)    |
| 36  | 0.0003; -0.1129 (162.60)                                     | 0.0219; 8.8055 (164.30)    | 0.0026; 0.9909 (165.32)    | 0.0601; -62.7323 (165.28) | 0.0000; -0.0458 (164.71)   |
| 37  | 0.0004; 0.3491 (162.10)                                      | 0.0084; -0.7006 (164.27)   | 0.0062; -1.7387 (164.65)   | 0.0154; 11.2895 (164.78)  | 0.0025; 0.0638 (161.70)    |
| 38  | 0.0017; 0.7830 (161.91)                                      | 0.0515; 0.0815 (163.04)    | 0.0002; 1.2084 (164.28)    | 0.0027; 1.3973 (164.32)   | 0.0019; 1.7649 (161.68)    |
| 39  | 0.0099; 0.1905 (161.72)                                      | 0.0006; -1.5400 (162.30)   | 0.0082; 1.4832 (163.97)    | 0.0040; -1.5569 (164.10)  | 0.0010; -4.5284 (161.48)   |
| 40  | 0.0001; -0.1441 (161.56)                                     | 0.0583; -1.9651 (162.19)   | 0.0071; 5.6442 (163.63)    | 0.0134; 1.1595 (163.40)   | 0.0061; 4.6711 (161.47)    |
| 41  | 0.0029; -2.4438 (161.52)                                     | 0.0016; 2.4532 (162.12)    | 0.0018; -3.2980 (163.23)   | 0.0112; -18.8180 (163.00) | 0.0008; 1.0339 (161.02)    |
| 42  | 0.0005; -1.8489 (160.77)                                     | 0.0321; -10.1735 (161.23)  | 0.0139; -12.0373 (162.81)  | 0.0065; -11.3516 (162.06) | 0.0010; -0.1211 (160.96)   |
| 43  | 0.0032; -0.3756 (160.46)                                     | 0.0069; -3.0202 (160.86)   | 0.0091; 10.4478 (162.25)   | 0.0036; 10.5470 (162.00)  | 0.0001; -0.0808 (160.79)   |
| 44  | 0.0015; -0.9823 (160.04)                                     | 0.0001; 0.4611 (160.52)    | 0.0008; -1.9413 (161.71)   | 0.0055; -0.1640 (161.77)  | 0.0004; 0.0753 (160.35)    |
| 45  | 0.0380; 2.0198 (159.65)                                      | 0.0014; 0.1951 (160.49)    | 0.0111; 3.6798 (160.80)    | 0.0009; 0.8073 (161.18)   | 0.0003; 0.3349 (159.85)    |
| 46  | 0.0023; -0.3385 (159.47)                                     | 0.0153; 3.0611 (160.04)    | 0.0113; -9.4322 (160.72)   | 0.0084; 9.4364 (160.25)   | 0.0419; -0.7810 (158.63)   |
| 47  | 0.0014; 2.4209 (159.27)                                      | 0.0182; 4.0575 (159.76)    | 0.0439; -12.2646 (160.41)  | 0.0040; -2.1893 (160.00)  | 0.0041; -0.1053 (158.30)   |
| 48  | 0.0096; -15.7664 (158.54)                                    | 0.0155; -4.1569 (158.58)   | 0.0456; 1.1777 (159.80)    | 0.0020; -5.2513 (159.34)  | 0.0040; 7.2892 (158.29)    |
| 49  | 0.0038; -1.4557 (158.44)                                     | 0.0027; -1.9857 (158.44)   | 0.0226; -40.1029 (159.57)  | 0.0008; 1.0422 (159.11)   | 0.0088; 3.0964 (158.11)    |
| 50  | 0.0067; -0.4721 (158.22)                                     | 0.0034; 0.1602 (158.33)    | 0.0028; -0.0535 (159.51)   | 0.0218; -9.7771 (158.93)  | 0.0496; 1.3829 (157.31)    |

Table S2. (Continued)

| $j$ | c036                      | c042                       | $f_j; R_j, 10^{-40} \text{ erg cm}^3 (\lambda_j, \text{nm})$ | c053                       | c054                      |
|-----|---------------------------|----------------------------|--------------------------------------------------------------|----------------------------|---------------------------|
| 1   | 0.0200; 1.0360 (245.78)   | 0.0175; -4.7066 (246.29)   | 0.0174; 0.1860 (246.11)                                      | 0.0258; 4.8419 (249.20)    | 0.0119; 3.0691 (244.67)   |
| 2   | 0.0223; -2.1731 (244.55)  | 0.0090; 8.3328 (242.72)    | 0.0071; 4.5444 (241.88)                                      | 0.0170; 5.6243 (244.25)    | 0.0162; -10.0750 (243.86) |
| 3   | 1.0669; -51.7448 (233.68) | 0.3379; -729.2010 (232.54) | 0.8123; -459.3612 (231.85)                                   | 0.0698; 298.4370 (236.17)  | 0.7377; -78.4429 (232.29) |
| 4   | 0.1011; 22.0618 (230.28)  | 0.2870; 295.0841 (231.99)  | 0.2095; 383.8614 (229.84)                                    | 0.0407; -11.8536 (234.93)  | 0.2056; 97.2578 (228.76)  |
| 5   | 0.0042; -0.3152 (221.54)  | 0.3223; 317.0704 (229.66)  | 0.0062; -2.6130 (224.10)                                     | 0.6440; -308.2329 (232.09) | 0.0002; 0.1348 (218.67)   |
| 6   | 0.0001; -0.0095 (211.36)  | 0.0024; 1.5325 (221.11)    | 0.0000; -0.0238 (214.73)                                     | 0.0640; -18.0874 (228.92)  | 0.0002; 0.1465 (211.91)   |
| 7   | 0.0001; 0.0990 (210.51)   | 0.0017; -0.0878 (213.47)   | 0.0000; -0.0440 (207.94)                                     | 0.0063; -5.3251 (224.93)   | 0.0000; -0.0074 (209.19)  |
| 8   | 0.0001; -0.0404 (205.30)  | 0.0003; 0.1164 (208.37)    | 0.0002; 0.1400 (202.64)                                      | 0.0043; 2.5295 (222.38)    | 0.0000; 0.0057 (208.24)   |
| 9   | 0.2465; 2.3138 (196.89)   | 0.0664; -27.7530 (198.21)  | 0.2873; 41.3785 (196.74)                                     | 0.0688; -16.7456 (202.39)  | 0.2226; 19.1186 (196.70)  |
| 10  | 0.2693; 3.0168 (195.02)   | 0.2807; 55.5213 (197.55)   | 0.2405; 28.8172 (195.17)                                     | 0.0273; 8.7285 (201.39)    | 0.2324; -85.8818 (195.67) |
| 11  | 1.0377; -55.1288 (192.44) | 0.1350; 69.4818 (195.04)   | 0.0014; -1.4414 (193.72)                                     | 0.0587; -45.2434 (199.76)  | 0.7958; 6.5049 (192.81)   |
| 12  | 0.0104; 0.0589 (192.12)   | 0.4185; -453.9741 (193.30) | 0.8536; -245.1513 (192.70)                                   | 0.0818; -13.7192 (198.91)  | 0.0189; 0.3798 (191.98)   |
| 13  | 0.2145; 46.9335 (190.78)  | 0.0245; 13.9881 (192.29)   | 0.0075; 1.9650 (192.04)                                      | 0.2327; 97.0879 (195.95)   | 0.2421; 53.1835 (191.88)  |
| 14  | 0.0381; -10.9682 (190.45) | 0.0432; -65.3701 (191.38)  | 0.3499; 241.4189 (190.94)                                    | 0.3030; -127.1270 (193.99) | 0.0710; -90.8175 (187.49) |
| 15  | 0.0022; 2.6031 (186.38)   | 0.2385; 120.0884 (191.03)  | 0.0001; -0.1865 (187.13)                                     | 0.1933; 121.4836 (193.64)  | 0.0002; 1.1521 (187.33)   |
| 16  | 0.0107; -6.9724 (185.91)  | 0.5144; 295.6824 (190.85)  | 0.0000; -0.0313 (186.87)                                     | 0.0246; 101.4053 (192.11)  | 0.0131; 59.2855 (187.28)  |
| 17  | 0.0009; 0.3717 (185.74)   | 0.0237; 16.9612 (188.48)   | 0.0127; -18.1532 (186.70)                                    | 0.5141; -21.8935 (189.76)  | 0.0144; -31.0275 (185.88) |
| 18  | 0.0002; -3.8907 (185.58)  | 0.0003; 0.6381 (187.73)    | 0.0235; 43.5297 (184.40)                                     | 0.0732; -92.2258 (188.87)  | 0.0000; 0.0060 (185.38)   |
| 19  | 0.0000; 0.0059 (184.84)   | 0.0128; 27.6845 (185.64)   | 0.0000; 0.0045 (182.98)                                      | 0.0137; 2.2962 (184.32)    | 0.0000; 0.0000 (184.15)   |
| 20  | 0.0000; 0.0023 (182.01)   | 0.0025; -5.7332 (182.39)   | 0.0664; -43.5931 (180.17)                                    | 0.0053; -0.3359 (182.84)   | 0.0042; 4.7767 (180.59)   |
| 21  | 0.0001; 0.4566 (177.66)   | 0.0807; -17.3372 (180.61)  | 0.0097; -3.2884 (178.81)                                     | 0.1468; 33.4229 (180.62)   | 0.0151; 20.9166 (179.18)  |
| 22  | 0.1266; 7.4363 (176.26)   | 0.0292; -2.5595 (179.70)   | 0.0016; 2.5359 (178.14)                                      | 0.0844; -26.7762 (179.23)  | 0.1326; 9.6612 (177.44)   |
| 23  | 0.0579; -4.0535 (173.92)  | 0.0550; 5.1507 (176.99)    | 0.0323; -1.3295 (175.51)                                     | 0.0525; -5.6422 (177.55)   | 0.0097; -1.8006 (175.19)  |
| 24  | 0.0016; 2.8340 (173.16)   | 0.0004; -0.8603 (174.47)   | 0.0427; -1.8048 (174.02)                                     | 0.0032; 0.2308 (175.00)    | 0.0006; 0.2651 (173.83)   |
| 25  | 0.0008; -0.1197 (172.34)  | 0.0004; 1.1388 (173.77)    | 0.0009; -0.5593 (173.43)                                     | 0.0109; -9.0212 (173.27)   | 0.0074; -1.1661 (172.67)  |
| 26  | 0.0063; -1.8531 (172.03)  | 0.0433; -1.9506 (172.65)   | 0.0043; 0.4346 (171.69)                                      | 0.0049; 0.7695 (170.92)    | 0.0005; -1.3330 (170.13)  |
| 27  | 0.0006; 3.2509 (171.12)   | 0.0071; 2.7715 (171.85)    | 0.0016; -1.0963 (170.65)                                     | 0.0062; 2.1352 (169.84)    | 0.0014; 0.7620 (168.80)   |
| 28  | 0.0030; -3.9851 (170.93)  | 0.0052; -10.2901 (170.98)  | 0.0012; -0.1989 (170.24)                                     | 0.0282; 9.2763 (169.54)    | 0.0016; -0.7470 (168.76)  |
| 29  | 0.0006; 0.1557 (167.93)   | 0.0013; 6.1120 (170.66)    | 0.0038; -0.9333 (169.99)                                     | 0.0102; -11.2150 (169.45)  | 0.0115; -10.5761 (168.23) |
| 30  | 0.0013; -0.5905 (167.30)  | 0.0136; -3.7859 (170.00)   | 0.0048; -3.3605 (169.71)                                     | 0.0056; 1.0922 (168.99)    | 0.0019; 1.8470 (168.15)   |
| 31  | 0.0019; 0.2295 (166.91)   | 0.0005; 1.7820 (168.25)    | 0.0015; -3.7182 (168.74)                                     | 0.0011; 3.7023 (168.36)    | 0.0016; -0.2411 (167.76)  |
| 32  | 0.0013; -0.4982 (166.72)  | 0.0004; 0.8711 (166.62)    | 0.0844; 16.8937 (166.17)                                     | 0.0028; -1.0188 (167.42)   | 0.0086; 5.3191 (166.81)   |
| 33  | 0.0357; -2.2846 (165.56)  | 0.0590; -3.6468 (166.53)   | 0.0010; -1.6142 (165.63)                                     | 0.0136; -35.8286 (167.18)  | 0.0478; 0.6228 (166.20)   |
| 34  | 0.0008; 1.8218 (164.67)   | 0.0110; 2.6041 (165.41)    | 0.1079; -5.9537 (163.70)                                     | 0.0353; 24.1870 (166.54)   | 0.0017; -0.2344 (166.09)  |
| 35  | 0.0054; 7.7794 (164.45)   | 0.0206; -5.7954 (165.32)   | 0.0182; 4.6178 (163.46)                                      | 0.0043; -1.9509 (165.86)   | 0.0067; -8.1691 (165.75)  |
| 36  | 0.0002; -0.2084 (163.69)  | 0.0036; -1.3088 (164.78)   | 0.0377; -9.4953 (163.39)                                     | 0.0186; -12.9067 (165.42)  | 0.0001; 0.1058 (165.25)   |
| 37  | 0.0150; -4.8471 (163.17)  | 0.0004; 2.0308 (164.26)    | 0.0015; 0.9135 (163.20)                                      | 0.0036; 3.5402 (165.11)    | 0.0220; 22.6532 (164.84)  |
| 38  | 0.0006; 1.3409 (162.87)   | 0.0015; -3.4631 (164.21)   | 0.0011; -4.0673 (163.05)                                     | 0.0374; -0.0900 (164.99)   | 0.0440; -21.7916 (164.56) |
| 39  | 0.0002; 0.1433 (162.43)   | 0.1162; -10.5180 (163.24)  | 0.0006; -0.6937 (162.13)                                     | 0.0001; 0.0003 (164.37)    | 0.0004; 1.2826 (163.69)   |
| 40  | 0.0005; -1.1053 (162.12)  | 0.0023; 5.2927 (162.89)    | 0.0010; 1.4582 (162.04)                                      | 0.0024; 2.0065 (163.60)    | 0.0720; -24.8857 (163.06) |
| 41  | 0.0007; -0.5896 (161.65)  | 0.0007; 2.2319 (162.53)    | 0.0001; 0.0118 (161.18)                                      | 0.0029; -0.8892 (162.88)   | 0.0212; 3.8320 (162.23)   |
| 42  | 0.0021; 6.0240 (161.29)   | 0.0001; 0.0491 (162.47)    | 0.0015; 5.7767 (160.97)                                      | 0.0045; 1.9383 (162.48)    | 0.0046; 3.3230 (161.89)   |
| 43  | 0.0102; 0.6536 (160.77)   | 0.0044; -0.4088 (161.90)   | 0.0001; 0.0916 (160.73)                                      | 0.0190; 4.8975 (161.72)    | 0.0003; -0.4878 (161.72)  |
| 44  | 0.0186; 0.5691 (160.26)   | 0.0113; 10.7542 (161.38)   | 0.0073; 1.6278 (160.69)                                      | 0.0203; 1.0031 (161.63)    | 0.0017; 1.1191 (161.03)   |
| 45  | 0.0038; -1.0964 (159.74)  | 0.0020; 0.8727 (161.07)    | 0.0078; -15.4154 (160.29)                                    | 0.0029; -2.3192 (161.52)   | 0.0090; -3.3732 (160.42)  |
| 46  | 0.0017; -2.1157 (159.68)  | 0.0002; 0.0373 (160.89)    | 0.0007; -0.0697 (159.93)                                     | 0.0030; -4.7427 (160.99)   | 0.0001; -0.9401 (160.33)  |
| 47  | 0.0043; 0.4720 (159.61)   | 0.0001; 0.2393 (160.70)    | 0.0214; 11.0807 (159.60)                                     | 0.0040; 3.2215 (160.71)    | 0.0161; 9.1488 (160.06)   |
| 48  | 0.0047; -1.7966 (158.13)  | 0.0165; 3.6300 (159.79)    | 0.0031; -2.0862 (159.09)                                     | 0.0084; -12.1830 (160.61)  | 0.0252; -6.2429 (159.51)  |
| 49  | 0.0126; 17.4808 (157.70)  | 0.0027; 2.5238 (159.45)    | 0.0046; 2.9059 (158.28)                                      | 0.0076; 8.7803 (160.56)    | 0.0109; -12.2931 (158.93) |
| 50  | 0.0470; 10.3650 (157.31)  | 0.0108; 4.6830 (158.73)    | 0.0063; 3.6089 (158.15)                                      | 0.0141; -44.3920 (160.08)  | 0.0213; -8.2448 (158.47)  |

Table S2. (Continued)

| <i>j</i> | $f_j; R_j, 10^{-40} \text{ erg cm}^3 (\lambda_j, \text{nm})$ |                            |                            |                            |                            |
|----------|--------------------------------------------------------------|----------------------------|----------------------------|----------------------------|----------------------------|
|          | c055                                                         | c068                       | c071                       | c072                       | c074                       |
| 1        | 0.0174; -8.4065 (244.50)                                     | 0.0179; -5.1432 (245.72)   | 0.0187; 11.8821 (246.29)   | 0.0159; -4.7794 (244.59)   | 0.0254; -22.4999 (244.35)  |
| 2        | 0.0066; -0.7560 (238.53)                                     | 0.0193; -9.1223 (244.36)   | 0.0055; 5.7231 (243.77)    | 0.0146; 4.7177 (244.15)    | 0.0090; 22.5895 (244.31)   |
| 3        | 0.5308; 58.7206 (232.78)                                     | 0.5042; 382.4101 (233.08)  | 0.1109; -22.8970 (235.73)  | 0.4291; 347.0174 (233.15)  | 0.6630; -113.3326 (232.87) |
| 4        | 0.0044; 8.2514 (223.45)                                      | 0.4266; -309.3130 (230.74) | 0.0636; -246.2463 (233.69) | 0.4930; -182.7646 (229.82) | 0.2638; 17.2986 (228.90)   |
| 5        | 0.1800; -93.8057 (222.65)                                    | 0.0047; 2.7625 (224.88)    | 0.3268; 170.0835 (230.73)  | 0.0019; -0.2128 (223.29)   | 0.0008; 0.0118 (218.90)    |
| 6        | 0.0018; 1.3692 (219.29)                                      | 0.0000; -0.0556 (213.97)   | 0.1820; -9.6744 (225.73)   | 0.0000; 0.0221 (214.44)    | 0.0001; 0.0179 (211.17)    |
| 7        | 0.0031; -1.9475 (215.46)                                     | 0.0001; 0.2143 (213.62)    | 0.0279; -7.0493 (224.49)   | 0.0000; 0.0131 (212.92)    | 0.0000; -0.0153 (208.62)   |
| 8        | 0.0002; -0.0105 (204.91)                                     | 0.0000; -0.0352 (210.38)   | 0.0017; 2.9433 (223.44)    | 0.0002; -0.0620 (210.50)   | 0.0000; -0.0008 (208.43)   |
| 9        | 0.1814; 26.5677 (197.22)                                     | 0.2768; 55.0907 (196.87)   | 0.0102; 7.0023 (205.63)    | 0.2261; -92.8013 (197.42)  | 0.2325; 111.6579 (196.98)  |
| 10       | 0.0414; -78.8459 (197.10)                                    | 0.0813; -59.9521 (196.78)  | 0.0057; 5.3105 (201.23)    | 0.0445; 0.7776 (196.50)    | 0.3112; -32.0272 (195.89)  |
| 11       | 0.2012; 25.8979 (195.33)                                     | 0.2377; -78.9844 (195.82)  | 0.0314; 42.0248 (200.25)   | 0.2934; -22.4741 (195.54)  | 0.0378; -14.8158 (193.40)  |
| 12       | 0.0220; -7.1526 (194.74)                                     | 0.4943; 554.9695 (192.40)  | 0.0062; 4.8636 (199.09)    | 0.4207; 407.0296 (192.74)  | 0.8115; -323.7137 (192.34) |
| 13       | 0.2690; 269.4237 (193.44)                                    | 0.6167; -516.5443 (191.09) | 0.0229; -82.5608 (197.52)  | 0.7691; -281.8967 (191.05) | 0.2443; 238.7632 (191.52)  |
| 14       | 0.4042; -282.1713 (192.64)                                   | 0.0037; -5.5134 (188.80)   | 0.3383; 508.9361 (196.17)  | 0.0024; 0.3945 (189.11)    | 0.0035; 13.8987 (187.81)   |
| 15       | 0.1591; -35.1275 (191.61)                                    | 0.0001; 0.0730 (188.21)    | 0.1697; -606.8669 (194.54) | 0.0000; -0.0361 (188.50)   | 0.0028; -12.4620 (187.04)  |
| 16       | 0.0674; 24.3684 (189.57)                                     | 0.0011; -0.3414 (188.03)   | 0.5857; 286.1456 (191.31)  | 0.0192; -19.9531 (188.02)  | 0.0005; -0.1587 (186.51)   |
| 17       | 0.0035; 6.3600 (188.11)                                      | 0.0003; 4.0195 (187.61)    | 0.1981; -42.8482 (190.36)  | 0.0043; -18.3478 (187.16)  | 0.0000; -0.0120 (185.17)   |
| 18       | 0.0240; -4.9464 (188.02)                                     | 0.0004; -0.1207 (186.67)   | 0.0013; 12.7341 (188.07)   | 0.0007; -0.1890 (186.16)   | 0.0003; 0.0235 (184.60)    |
| 19       | 0.0032; 19.9651 (187.61)                                     | 0.0168; 8.0978 (185.70)    | 0.0016; -1.9256 (184.80)   | 0.0063; 28.1189 (184.72)   | 0.0007; 2.0577 (183.66)    |
| 20       | 0.0084; 7.9830 (181.59)                                      | 0.0006; 0.2646 (185.66)    | 0.0837; 18.6538 (183.82)   | 0.0036; -2.5190 (184.40)   | 0.0231; 12.6786 (182.44)   |
| 21       | 0.0082; 1.8357 (180.54)                                      | 0.0165; 6.2447 (177.93)    | 0.0493; -51.7477 (183.79)  | 0.0103; 8.1600 (180.94)    | 0.0067; -7.4420 (177.82)   |
| 22       | 0.0098; 5.5154 (180.45)                                      | 0.0092; 10.0867 (176.37)   | 0.1689; -67.7573 (180.38)  | 0.1260; 5.9565 (177.29)    | 0.0110; 1.9833 (177.16)    |
| 23       | 0.1620; 36.5675 (176.78)                                     | 0.1531; 8.6756 (176.35)    | 0.0159; -13.6835 (176.38)  | 0.0265; 9.8904 (176.56)    | 0.1190; -3.5715 (176.31)   |
| 24       | 0.1039; -5.8305 (174.83)                                     | 0.0022; 0.4201 (174.48)    | 0.0311; 29.8957 (174.63)   | 0.0069; -2.7485 (175.42)   | 0.0064; -4.4621 (175.34)   |
| 25       | 0.0017; -4.4464 (174.14)                                     | 0.0014; -1.2922 (171.98)   | 0.0005; -1.7572 (173.77)   | 0.0023; 0.6027 (173.96)    | 0.0001; -0.3377 (172.15)   |
| 26       | 0.1628; 44.0865 (173.75)                                     | 0.0003; -1.2902 (171.10)   | 0.0031; -3.2115 (172.55)   | 0.0062; -0.8210 (173.40)   | 0.0094; 7.1156 (171.23)    |
| 27       | 0.0305; -26.3920 (170.98)                                    | 0.0005; -0.9998 (170.77)   | 0.0028; -5.6644 (171.71)   | 0.0002; 0.8962 (170.57)    | 0.0399; 7.2949 (170.99)    |
| 28       | 0.0059; 10.6780 (170.63)                                     | 0.0248; -5.8209 (169.73)   | 0.0413; -13.8573 (170.59)  | 0.0099; -2.0875 (168.13)   | 0.0022; 3.5276 (169.76)    |
| 29       | 0.0003; -1.5907 (170.05)                                     | 0.0001; 0.1802 (168.88)    | 0.0084; 12.9963 (170.40)   | 0.0297; -5.8418 (167.85)   | 0.0011; -1.3583 (168.93)   |
| 30       | 0.0011; -0.2180 (169.66)                                     | 0.0002; 0.4691 (168.03)    | 0.0068; -1.1353 (168.68)   | 0.0045; -0.9159 (167.04)   | 0.0063; 2.6181 (168.31)    |
| 31       | 0.0049; 9.5455 (169.27)                                      | 0.0012; -0.1014 (167.95)   | 0.0020; 3.1173 (167.92)    | 0.0029; -0.4965 (166.63)   | 0.0015; -1.3894 (167.70)   |
| 32       | 0.0126; 18.3984 (168.97)                                     | 0.0008; 0.2801 (167.69)    | 0.0151; 3.5629 (167.63)    | 0.0014; 3.6572 (166.32)    | 0.0545; 10.4485 (166.96)   |
| 33       | 0.0018; 1.0155 (168.21)                                      | 0.0153; -9.0998 (166.88)   | 0.0035; 3.9152 (167.24)    | 0.0038; -4.3130 (165.91)   | 0.0308; 14.4088 (166.85)   |
| 34       | 0.0427; 12.5562 (167.76)                                     | 0.0050; -3.0697 (166.25)   | 0.0006; -2.2482 (166.30)   | 0.0006; 1.0218 (165.62)    | 0.0082; 4.0771 (166.63)    |
| 35       | 0.0345; 13.0234 (167.66)                                     | 0.0414; -0.8516 (166.05)   | 0.0197; 1.9557 (166.18)    | 0.0091; 1.1028 (165.20)    | 0.0040; -0.8840 (166.49)   |
| 36       | 0.0158; -3.4255 (166.91)                                     | 0.0026; -5.8415 (165.58)   | 0.0010; 2.1576 (165.66)    | 0.0129; -0.9723 (165.06)   | 0.0397; -9.0702 (165.92)   |
| 37       | 0.0290; 20.7840 (166.73)                                     | 0.0537; 17.1297 (165.20)   | 0.0026; -1.7473 (165.44)   | 0.0168; -1.8104 (164.80)   | 0.0212; 6.2248 (165.81)    |
| 38       | 0.0059; 6.5510 (165.72)                                      | 0.0743; -4.0905 (164.61)   | 0.0088; 2.3892 (165.01)    | 0.0189; -4.2785 (164.74)   | 0.0014; -4.9920 (165.36)   |
| 39       | 0.0032; 1.9357 (165.62)                                      | 0.0045; 3.6067 (163.52)    | 0.0068; 9.1356 (164.12)    | 0.0148; 8.6151 (164.48)    | 0.0533; 12.5953 (164.93)   |
| 40       | 0.0133; 3.2109 (165.17)                                      | 0.0021; -3.2550 (162.36)   | 0.0679; 17.3987 (163.84)   | 0.0527; -12.0106 (163.97)  | 0.0026; 3.2669 (162.59)    |
| 41       | 0.0222; -23.1651 (164.28)                                    | 0.0015; 7.7889 (162.34)    | 0.0020; -2.7657 (163.26)   | 0.0004; 2.4173 (163.38)    | 0.0132; 2.0370 (161.76)    |
| 42       | 0.0062; -1.7530 (164.26)                                     | 0.0043; 0.8649 (161.72)    | 0.0373; 21.1673 (162.92)   | 0.0477; -11.4478 (162.40)  | 0.0038; -0.5591 (161.68)   |
| 43       | 0.0051; 4.5691 (163.63)                                      | 0.0002; -0.1165 (160.95)   | 0.0403; -12.6494 (162.45)  | 0.0457; -8.0797 (160.74)   | 0.0012; 1.9505 (161.31)    |
| 44       | 0.0006; 0.4904 (162.71)                                      | 0.0123; -3.0651 (160.82)   | 0.0159; -40.6931 (161.65)  | 0.0131; 5.9322 (160.36)    | 0.0117; 21.3015 (160.93)   |
| 45       | 0.0057; -5.7102 (162.64)                                     | 0.0047; -1.2527 (160.73)   | 0.0040; 8.7744 (161.41)    | 0.0023; -0.5773 (160.30)   | 0.0331; -19.7965 (160.62)  |
| 46       | 0.0023; -5.7239 (162.61)                                     | 0.0060; -3.7564 (160.34)   | 0.0005; -1.6769 (161.01)   | 0.0021; -4.6098 (160.09)   | 0.0006; 0.1006 (160.10)    |
| 47       | 0.0011; 3.0134 (162.16)                                      | 0.0013; 2.2193 (160.21)    | 0.0046; 1.7710 (160.79)    | 0.0028; -1.0951 (159.49)   | 0.0009; -0.5102 (159.81)   |
| 48       | 0.0028; -0.7578 (161.41)                                     | 0.0151; -4.5906 (159.16)   | 0.0103; 4.3557 (160.56)    | 0.0018; -2.3821 (158.65)   | 0.0746; 15.5983 (159.03)   |
| 49       | 0.0001; 0.0079 (161.17)                                      | 0.0926; -2.6917 (158.17)   | 0.0009; -2.5032 (160.32)   | 0.0271; -40.5822 (158.19)  | 0.0028; 6.7851 (158.78)    |
| 50       | 0.0000; -0.1881 (160.83)                                     | 0.0129; 1.1114 (157.94)    | 0.0008; -4.0627 (160.12)   | 0.0813; -4.1490 (157.63)   | 0.0035; -4.6793 (158.43)   |

Table S2. (Continued)

| $j$ | c075                       | c078                       | $f_j; R_j, 10^{-40} \text{ erg cm}^3 (\lambda_j, \text{nm})$ | c083                       | c095                       | c096 |
|-----|----------------------------|----------------------------|--------------------------------------------------------------|----------------------------|----------------------------|------|
| 1   | 0.0177; 3.1569 (245.70)    | 0.0137; -8.0082 (244.51)   | 0.0046; 29.1834 (247.50)                                     | 0.0214; 2.1627 (245.94)    | 0.0180; 3.1584 (246.19)    |      |
| 2   | 0.0071; 3.6038 (241.88)    | 0.0162; 4.6278 (244.38)    | 0.0022; 9.6689 (247.36)                                      | 0.0227; 10.5798 (244.69)   | 0.0174; 4.1739 (244.49)    |      |
| 3   | 0.7919; -40.6632 (231.88)  | 0.6760; -123.3777 (232.44) | 0.1878; -0.8123 (241.30)                                     | 0.8147; 301.2981 (233.81)  | 0.1480; -260.4588 (233.74) |      |
| 4   | 0.2750; -21.9141 (229.28)  | 0.2431; 53.5905 (229.90)   | 0.1341; -63.2676 (232.76)                                    | 0.3105; -222.9481 (230.45) | 0.0577; -3.7995 (231.80)   |      |
| 5   | 0.0002; -0.1394 (221.12)   | 0.0003; -0.0273 (217.49)   | 0.2019; 88.7162 (230.89)                                     | 0.0012; 0.1308 (223.07)    | 0.6398; 149.5846 (231.25)  |      |
| 6   | 0.0000; 0.0103 (212.54)    | 0.0001; 0.0082 (213.34)    | 0.0117; 3.2216 (226.07)                                      | 0.0000; -0.0141 (212.91)   | 0.0049; -0.3639 (220.58)   |      |
| 7   | 0.0000; -0.0101 (208.18)   | 0.0000; -0.0055 (210.01)   | 0.0518; -15.5929 (224.35)                                    | 0.0000; -0.0588 (212.03)   | 0.0023; 2.2182 (218.56)    |      |
| 8   | 0.0000; 0.0109 (202.47)    | 0.0000; -0.0044 (207.62)   | 0.1515; -18.1848 (218.54)                                    | 0.0001; 0.0089 (206.74)    | 0.0041; -1.4982 (215.89)   |      |
| 9   | 0.2489; -9.0238 (196.27)   | 0.2423; 672.2908 (196.56)  | 0.0286; -60.5594 (209.18)                                    | 0.2506; -67.4173 (197.00)  | 0.0051; -13.1487 (203.11)  |      |
| 10  | 0.2418; 135.1543 (195.43)  | 0.2428; -649.5407 (196.45) | 0.2158; -205.1395 (203.54)                                   | 0.2717; 42.1536 (195.04)   | 0.3297; 57.1625 (197.92)   |      |
| 11  | 0.8713; -211.0169 (192.43) | 0.4189; -171.6860 (192.48) | 0.1057; -72.0102 (200.91)                                    | 0.0002; -1.1999 (192.96)   | 0.2087; -153.8827 (196.76) |      |
| 12  | 0.0002; 0.0049 (191.99)    | 0.3772; -134.8335 (192.15) | 0.0224; 10.6794 (198.07)                                     | 0.7694; 167.7033 (192.61)  | 0.0865; 46.7228 (194.42)   |      |
| 13  | 0.2765; 16.6121 (191.10)   | 0.3088; 273.9352 (191.62)  | 0.2425; 443.9959 (195.87)                                    | 0.1295; 41.1809 (191.06)   | 0.2620; -79.8422 (193.34)  |      |
| 14  | 0.1302; 62.7495 (190.89)   | 0.0016; -2.7219 (188.25)   | 0.0825; 261.4369 (194.64)                                    | 0.3799; -165.4439 (190.77) | 0.0261; -135.8311 (191.89) |      |
| 15  | 0.0175; 6.4864 (187.17)    | 0.0005; 0.1944 (187.92)    | 0.1166; -206.7613 (193.97)                                   | 0.0001; -0.1026 (186.69)   | 0.5193; 294.4009 (191.38)  |      |
| 16  | 0.0000; -0.1318 (187.11)   | 0.0015; 10.2689 (187.19)   | 0.0551; -234.3197 (190.35)                                   | 0.0086; -18.7434 (186.17)  | 0.0616; 60.7650 (190.06)   |      |
| 17  | 0.0000; -0.0042 (185.75)   | 0.0002; 0.0185 (185.43)    | 0.0243; -14.0617 (188.72)                                    | 0.0012; 12.0476 (185.97)   | 0.2075; -77.0381 (189.70)  |      |
| 18  | 0.0011; -3.0137 (185.00)   | 0.0010; -0.0206 (184.83)   | 0.3547; 80.3001 (188.30)                                     | 0.0000; -0.0413 (185.79)   | 0.0013; 2.6608 (188.41)    |      |
| 19  | 0.0000; 0.0026 (182.71)    | 0.0000; -0.0006 (184.60)   | 0.1839; -65.0628 (187.02)                                    | 0.0167; -7.0010 (184.51)   | 0.0038; -11.5154 (183.93)  |      |
| 20  | 0.0386; 59.2239 (182.12)   | 0.0154; 8.9768 (181.37)    | 0.0225; -0.1534 (184.13)                                     | 0.0000; -0.0028 (182.98)   | 0.0044; 6.8281 (183.60)    |      |
| 21  | 0.0489; -46.7300 (178.73)  | 0.0087; -6.9764 (177.63)   | 0.0327; -24.6580 (182.25)                                    | 0.0189; 2.7356 (177.05)    | 0.0059; -4.0715 (180.31)   |      |
| 22  | 0.0081; 0.0638 (177.69)    | 0.0047; -35.6789 (176.34)  | 0.1201; 74.4838 (182.07)                                     | 0.1315; -3.1135 (176.69)   | 0.1592; 7.9524 (177.69)    |      |
| 23  | 0.0004; 0.1818 (175.92)    | 0.1280; 38.3355 (176.21)   | 0.0046; 6.6573 (178.05)                                      | 0.0003; 0.6034 (174.00)    | 0.0281; -3.9395 (176.46)   |      |
| 24  | 0.0752; 5.0412 (174.06)    | 0.0422; 9.4507 (171.76)    | 0.0648; 1.6465 (176.94)                                      | 0.0542; -1.6050 (173.11)   | 0.0109; -13.5926 (174.84)  |      |
| 25  | 0.0008; 0.9061 (172.15)    | 0.0012; 3.5450 (171.54)    | 0.0325; -11.2374 (175.85)                                    | 0.0006; 0.1445 (172.70)    | 0.0019; -1.5848 (172.31)   |      |
| 26  | 0.0046; -4.7796 (172.12)   | 0.0025; 3.9784 (170.95)    | 0.0023; 1.9775 (174.13)                                      | 0.0008; -0.6510 (172.04)   | 0.0015; -0.4922 (171.73)   |      |
| 27  | 0.0006; 1.2876 (171.29)    | 0.0027; -0.7840 (170.73)   | 0.0126; -17.7138 (171.80)                                    | 0.0010; 1.2678 (171.65)    | 0.0267; -0.6978 (170.89)   |      |
| 28  | 0.0049; -1.8768 (169.32)   | 0.0154; 4.8803 (168.78)    | 0.0030; -8.2616 (171.20)                                     | 0.0001; 0.0209 (171.01)    | 0.0102; 7.9402 (169.64)    |      |
| 29  | 0.0006; 0.5130 (167.79)    | 0.0174; -5.6239 (168.57)   | 0.0034; 0.5721 (170.28)                                      | 0.0001; 0.0544 (168.52)    | 0.0009; -1.4515 (168.49)   |      |
| 30  | 0.0529; 3.6408 (166.80)    | 0.0032; 5.9311 (168.54)    | 0.0015; -1.9770 (169.83)                                     | 0.0008; 0.7227 (167.68)    | 0.0016; -0.7068 (168.21)   |      |
| 31  | 0.0041; 2.2810 (165.91)    | 0.0013; 0.1928 (168.12)    | 0.0009; 3.7235 (169.13)                                      | 0.0031; 2.6425 (167.53)    | 0.0016; 3.2438 (167.34)    |      |
| 32  | 0.0082; 8.3226 (165.05)    | 0.0621; 8.5130 (167.38)    | 0.0040; 2.6066 (168.48)                                      | 0.0200; 0.6808 (166.43)    | 0.0008; -1.9742 (167.23)   |      |
| 33  | 0.0241; -10.2127 (165.03)  | 0.0315; 22.2585 (167.05)   | 0.0491; -3.6832 (168.18)                                     | 0.0142; -2.2509 (166.03)   | 0.0602; 11.3499 (166.74)   |      |
| 34  | 0.0019; 1.0352 (164.23)    | 0.0013; 0.7975 (166.32)    | 0.0099; 19.0717 (167.92)                                     | 0.0009; 0.5635 (164.29)    | 0.0013; 0.5206 (166.04)    |      |
| 35  | 0.0024; -2.2710 (163.78)   | 0.0004; 0.9085 (166.19)    | 0.0045; 6.5823 (167.21)                                      | 0.0018; 1.6120 (164.23)    | 0.0586; -21.5835 (165.30)  |      |
| 36  | 0.0086; 3.1891 (163.37)    | 0.0012; 1.1241 (165.50)    | 0.0075; -2.0656 (166.37)                                     | 0.0073; -7.1866 (163.77)   | 0.0637; 10.1072 (165.03)   |      |
| 37  | 0.1344; -9.6293 (163.16)   | 0.0392; -3.7441 (165.37)   | 0.0183; -3.3141 (165.51)                                     | 0.0010; 0.7914 (163.08)    | 0.0036; -1.6519 (164.35)   |      |
| 38  | 0.0004; -0.2460 (162.37)   | 0.0139; 14.4280 (165.25)   | 0.0191; -30.7926 (165.35)                                    | 0.0035; 0.4006 (162.61)    | 0.0038; 0.4973 (164.26)    |      |
| 39  | 0.0003; 0.2670 (162.15)    | 0.0077; -15.3489 (164.16)  | 0.0078; -12.8841 (164.82)                                    | 0.0055; 7.2325 (162.48)    | 0.0045; -7.5979 (163.18)   |      |
| 40  | 0.0003; 0.7082 (162.08)    | 0.0090; -3.3330 (161.99)   | 0.0354; -26.9388 (164.56)                                    | 0.0053; 0.9318 (162.24)    | 0.0037; 14.7616 (162.95)   |      |
| 41  | 0.0139; 2.9556 (160.94)    | 0.0092; -7.5872 (161.45)   | 0.0222; 3.6943 (164.04)                                      | 0.0028; -4.3818 (161.95)   | 0.0003; 0.6023 (162.83)    |      |
| 42  | 0.0061; 5.7338 (160.61)    | 0.0017; 2.0660 (161.43)    | 0.0212; 6.1796 (163.87)                                      | 0.0040; 1.9171 (161.26)    | 0.0305; 2.0974 (162.38)    |      |
| 43  | 0.0017; -1.3263 (160.49)   | 0.0396; 8.5848 (161.17)    | 0.0078; -4.0420 (163.45)                                     | 0.0035; 2.4534 (160.98)    | 0.0118; 1.8062 (162.07)    |      |
| 44  | 0.0126; -3.3580 (160.41)   | 0.0003; -0.3125 (160.55)   | 0.0299; -6.0522 (163.15)                                     | 0.0140; -11.8463 (160.90)  | 0.0011; 0.7763 (161.79)    |      |
| 45  | 0.0245; -1.9690 (160.13)   | 0.0313; 0.0767 (160.03)    | 0.0120; -9.0530 (162.64)                                     | 0.0032; 1.0610 (160.57)    | 0.0035; 6.2848 (161.23)    |      |
| 46  | 0.0005; -1.0518 (160.02)   | 0.0031; -1.2152 (159.92)   | 0.0121; -6.2909 (162.46)                                     | 0.0064; -2.1668 (160.43)   | 0.0102; -0.3071 (161.00)   |      |
| 47  | 0.0015; -1.0011 (158.87)   | 0.0009; -1.2384 (159.15)   | 0.0056; 2.7439 (162.36)                                      | 0.0057; 1.2895 (160.39)    | 0.0010; 0.2816 (160.54)    |      |
| 48  | 0.0105; 8.0160 (158.33)    | 0.0002; -0.1067 (159.01)   | 0.0045; 1.2212 (161.89)                                      | 0.0046; -2.2624 (158.31)   | 0.0028; -1.7292 (160.23)   |      |
| 49  | 0.0081; 3.9693 (158.24)    | 0.0035; -3.8501 (158.87)   | 0.0043; -6.1985 (161.75)                                     | 0.0020; -3.1952 (158.28)   | 0.0025; -2.3216 (160.02)   |      |
| 50  | 0.0043; -4.1973 (157.21)   | 0.0130; -11.2861 (158.60)  | 0.0106; -6.2266 (161.41)                                     | 0.0240; -27.9787 (157.60)  | 0.0017; 0.1163 (159.83)    |      |

Table S2. (Continued)

| $j$ | c107                       | c108                       | $f_j; R_j, 10^{-40} \text{ erg cm}^3 (\lambda_j, \text{ nm})$ | c111                       | c117                       | c122 |
|-----|----------------------------|----------------------------|---------------------------------------------------------------|----------------------------|----------------------------|------|
| 1   | 0.0187; -1.4576 (246.82)   | 0.0194; 6.4195 (246.30)    | 0.0196; -3.5017 (245.83)                                      | 0.0084; -18.5069 (247.92)  | 0.0159; 8.5855 (247.39)    |      |
| 2   | 0.0088; 8.1568 (243.90)    | 0.0091; -3.1705 (242.78)   | 0.0071; 2.4619 (242.13)                                       | 0.0252; 41.1578 (245.01)   | 0.0046; -0.9762 (241.43)   |      |
| 3   | 0.0873; 20.3921 (236.32)   | 0.4601; 589.0322 (232.31)  | 0.3845; -189.4096 (231.97)                                    | 0.0150; 1.5246 (240.29)    | 0.0408; 61.2627 (235.45)   |      |
| 4   | 0.0673; -260.7148 (234.36) | 0.5481; -433.0479 (230.09) | 0.6221; 94.8545 (229.56)                                      | 0.1241; -87.2825 (236.26)  | 0.1057; 155.7423 (230.97)  |      |
| 5   | 0.3268; 161.1939 (231.21)  | 0.0046; -0.5150 (226.38)   | 0.0017; -1.0969 (225.26)                                      | 0.0612; -67.9692 (230.56)  | 0.5935; -131.2379 (228.54) |      |
| 6   | 0.2328; -7.9984 (226.40)   | 0.0004; -0.4328 (218.08)   | 0.0001; -0.0083 (216.88)                                      | 0.4702; 176.0419 (228.79)  | 0.0044; 11.6027 (227.68)   |      |
| 7   | 0.0027; -1.0561 (225.48)   | 0.0002; 0.0859 (211.66)    | 0.0001; -0.0343 (210.07)                                      | 0.0943; 6.7884 (221.68)    | 0.0037; 16.9822 (216.48)   |      |
| 8   | 0.0009; -0.3466 (224.04)   | 0.0000; 0.0062 (206.46)    | 0.0000; 0.0083 (204.96)                                       | 0.0007; -0.4902 (219.56)   | 0.0281; -4.6398 (213.44)   |      |
| 9   | 0.0100; -4.9474 (205.98)   | 0.3602; 10.7705 (196.58)   | 0.3388; 38.0337 (196.66)                                      | 0.0130; 16.2877 (207.93)   | 0.0854; 14.8892 (203.50)   |      |
| 10  | 0.0096; -2.9841 (201.78)   | 0.1273; -2.3644 (195.43)   | 0.1469; -22.9386 (195.16)                                     | 0.1706; -140.9935 (205.55) | 0.0263; 8.0660 (199.96)    |      |
| 11  | 0.0297; 49.9452 (200.13)   | 0.0505; 10.5323 (194.73)   | 0.0367; -5.8910 (194.53)                                      | 0.0869; 100.3606 (202.43)  | 0.2253; -98.8671 (199.19)  |      |
| 12  | 0.0156; 11.6647 (199.53)   | 0.5046; 616.9993 (192.67)  | 0.4842; -206.6164 (192.64)                                    | 0.1007; 32.5560 (200.54)   | 0.0444; 41.7621 (197.34)   |      |
| 13  | 0.0252; -87.8145 (197.83)  | 0.3197; -164.8586 (191.42) | 0.6642; 42.0030 (190.83)                                      | 0.0032; -14.2401 (197.16)  | 0.1230; -154.1532 (195.46) |      |
| 14  | 0.3241; 478.1605 (196.08)  | 0.3072; -375.8316 (191.03) | 0.1618; 119.6389 (190.52)                                     | 0.2210; 331.2260 (194.44)  | 0.2351; -100.6974 (194.52) |      |
| 15  | 0.1481; -563.0257 (194.54) | 0.0988; -73.2687 (189.70)  | 0.0002; 0.1925 (189.10)                                       | 0.0460; -174.4793 (192.25) | 0.0690; 415.9844 (192.50)  |      |
| 16  | 0.3580; 206.3367 (191.54)  | 0.0069; 7.8180 (189.43)    | 0.0005; 0.0747 (188.59)                                       | 0.3459; -40.5960 (189.74)  | 0.4388; 12.6150 (189.74)   |      |
| 17  | 0.4589; 60.6949 (190.84)   | 0.0012; -0.7828 (188.88)   | 0.0178; 10.9295 (187.43)                                      | 0.1668; -221.0226 (189.26) | 0.3455; -153.2258 (188.98) |      |
| 18  | 0.0016; -8.1182 (188.49)   | 0.0000; 0.0761 (185.53)    | 0.0000; 0.0019 (185.21)                                       | 0.2683; 144.4502 (188.93)  | 0.1005; 31.4206 (186.97)   |      |
| 19  | 0.0092; -11.7922 (185.21)  | 0.0284; -49.4299 (184.13)  | 0.0089; 13.7130 (184.63)                                      | 0.0136; -8.7549 (185.18)   | 0.0166; -28.5700 (184.73)  |      |
| 20  | 0.1029; 11.4820 (184.18)   | 0.0097; 11.5031 (183.11)   | 0.0090; 24.5268 (182.43)                                      | 0.2025; -38.9606 (183.62)  | 0.0009; -4.9371 (182.73)   |      |
| 21  | 0.0105; -37.1129 (183.95)  | 0.0504; -8.4221 (179.07)   | 0.0031; 1.8997 (180.65)                                       | 0.0031; 10.7326 (182.94)   | 0.0183; 5.0629 (181.41)    |      |
| 22  | 0.1736; -65.6056 (180.58)  | 0.0597; 25.4119 (178.02)   | 0.0660; -43.7684 (178.62)                                     | 0.0787; 47.9218 (178.55)   | 0.0434; 34.3327 (178.92)   |      |
| 23  | 0.0149; -16.9561 (176.27)  | 0.0193; -6.3109 (177.24)   | 0.0053; 1.8878 (177.81)                                       | 0.0324; -6.2448 (177.48)   | 0.0254; 3.1087 (176.69)    |      |
| 24  | 0.0425; 30.7096 (174.66)   | 0.0104; 2.1209 (175.04)    | 0.0009; 0.0884 (175.03)                                       | 0.0208; -10.2585 (176.23)  | 0.0011; 3.4394 (175.41)    |      |
| 25  | 0.0005; -1.8221 (174.34)   | 0.0100; 0.8329 (173.06)    | 0.0722; 1.6062 (173.70)                                       | 0.0182; 16.6610 (174.30)   | 0.0119; -1.6082 (174.01)   |      |
| 26  | 0.0022; -1.9743 (172.89)   | 0.0275; -0.0130 (172.81)   | 0.0010; 0.4334 (172.29)                                       | 0.0014; -1.9255 (174.12)   | 0.0017; 1.8866 (172.87)    |      |
| 27  | 0.0010; -1.5088 (172.33)   | 0.0021; -0.7919 (170.52)   | 0.0013; 2.1084 (170.49)                                       | 0.0088; -11.3237 (172.85)  | 0.0052; 0.5676 (171.45)    |      |
| 28  | 0.0341; -21.3295 (170.62)  | 0.0011; -1.2624 (170.35)   | 0.0052; -3.2847 (169.92)                                      | 0.0200; -8.6855 (172.71)   | 0.0011; -0.2542 (170.37)   |      |
| 29  | 0.0182; 19.6907 (170.37)   | 0.0096; 1.4225 (168.62)    | 0.0024; -2.1049 (169.38)                                      | 0.0036; -2.5052 (171.91)   | 0.0005; -0.3642 (169.51)   |      |
| 30  | 0.0010; -2.4474 (168.24)   | 0.0011; -0.5106 (168.18)   | 0.0021; -0.1930 (169.26)                                      | 0.0091; -4.0933 (171.61)   | 0.0036; -0.9667 (168.90)   |      |
| 31  | 0.0041; 2.0181 (168.04)    | 0.0014; 0.9114 (168.09)    | 0.0108; 3.2136 (167.06)                                       | 0.0056; -3.5704 (168.53)   | 0.0031; -4.2392 (168.74)   |      |
| 32  | 0.0026; 4.9319 (167.46)    | 0.0095; 0.4888 (166.09)    | 0.0553; 23.1381 (165.62)                                      | 0.0024; -2.5623 (168.27)   | 0.0334; -11.7282 (168.37)  |      |
| 33  | 0.0107; 2.6143 (167.32)    | 0.0010; 1.7942 (165.53)    | 0.0281; 5.8145 (165.31)                                       | 0.0056; -21.3802 (168.05)  | 0.0030; -5.2459 (167.81)   |      |
| 34  | 0.0015; 0.4813 (166.89)    | 0.0018; -1.4136 (165.40)   | 0.0003; -0.0835 (164.73)                                      | 0.0095; 23.0574 (167.57)   | 0.0778; -65.4255 (166.79)  |      |
| 35  | 0.0092; -5.6644 (166.31)   | 0.0077; 5.7862 (165.04)    | 0.0008; -0.3186 (164.23)                                      | 0.0014; 5.0294 (167.25)    | 0.0527; 9.8838 (166.15)    |      |
| 36  | 0.0117; 2.6233 (166.22)    | 0.0020; 3.5339 (164.68)    | 0.0017; 2.7030 (163.68)                                       | 0.0012; -3.8688 (166.30)   | 0.0019; -5.2226 (165.63)   |      |
| 37  | 0.0045; 2.0947 (165.45)    | 0.0381; -19.6284 (164.43)  | 0.0011; -2.5683 (163.51)                                      | 0.0364; -8.9476 (165.72)   | 0.1253; 24.3220 (165.03)   |      |
| 38  | 0.0071; 0.6710 (165.12)    | 0.0358; 1.1979 (163.21)    | 0.1376; 4.7454 (163.17)                                       | 0.0035; -10.9989 (165.03)  | 0.0095; -2.5397 (164.13)   |      |
| 39  | 0.0098; 13.4642 (163.84)   | 0.0010; -1.2786 (163.07)   | 0.0020; 0.7979 (162.91)                                       | 0.0275; -9.9313 (164.89)   | 0.0033; -6.6161 (163.82)   |      |
| 40  | 0.0533; 3.1909 (163.63)    | 0.0003; 0.6492 (162.37)    | 0.0005; 1.5166 (162.07)                                       | 0.0146; -39.4852 (164.32)  | 0.0125; -5.2409 (163.26)   |      |
| 41  | 0.0152; 8.9947 (163.58)    | 0.0799; -0.4492 (162.13)   | 0.0159; 1.5958 (161.29)                                       | 0.0528; -58.1474 (163.96)  | 0.0483; -18.5397 (162.92)  |      |
| 42  | 0.0299; 15.2628 (162.59)   | 0.0252; -17.0129 (161.76)  | 0.0053; 1.7703 (161.20)                                       | 0.0133; -14.6615 (163.71)  | 0.0105; 9.6602 (162.45)    |      |
| 43  | 0.0340; -12.2964 (162.33)  | 0.0055; 3.1084 (161.07)    | 0.0019; -0.5784 (160.60)                                      | 0.0384; 82.9126 (163.45)   | 0.0095; 21.3476 (161.85)   |      |
| 44  | 0.0113; -24.4203 (161.89)  | 0.0002; -0.2694 (160.67)   | 0.0115; 2.2638 (160.32)                                       | 0.0104; 3.3820 (163.21)    | 0.0214; 5.7070 (161.57)    |      |
| 45  | 0.0026; -7.4898 (161.19)   | 0.0016; -0.2191 (160.54)   | 0.0073; 4.2979 (160.29)                                       | 0.0047; -1.1991 (162.62)   | 0.0058; -2.1574 (161.07)   |      |
| 46  | 0.0061; -4.9467 (160.85)   | 0.0091; 1.1165 (160.14)    | 0.0009; 0.1091 (159.36)                                       | 0.0042; -3.1427 (161.89)   | 0.0306; 2.8722 (160.92)    |      |
| 47  | 0.0046; -0.9366 (160.75)   | 0.0295; 10.7061 (160.01)   | 0.0075; -5.3758 (158.85)                                      | 0.0005; -1.0041 (161.71)   | 0.0126; -4.0552 (160.49)   |      |
| 48  | 0.0004; -0.4435 (160.63)   | 0.0047; -3.2629 (158.62)   | 0.0108; 21.7300 (158.58)                                      | 0.0024; -0.0854 (161.46)   | 0.0014; -1.0605 (160.26)   |      |
| 49  | 0.0013; 2.2978 (160.53)    | 0.0013; -7.2000 (158.58)   | 0.0230; -6.3810 (158.33)                                      | 0.0031; -9.1266 (160.96)   | 0.0033; -8.5855 (159.76)   |      |
| 50  | 0.0050; 3.6935 (159.92)    | 0.0009; 3.1095 (158.49)    | 0.0179; -3.6064 (158.28)                                      | 0.0608; 17.5902 (160.75)   | 0.0042; -0.1581 (159.42)   |      |



Table S2. (Continued)

| $j$ | c127                       | c128                       | $f_j; R_j, 10^{-40} \text{ erg cm}^3 (\lambda_j, \text{nm})$ | c137                       | c144                       |
|-----|----------------------------|----------------------------|--------------------------------------------------------------|----------------------------|----------------------------|
| 1   | 0.0154; 1.1441 (247.78)    | 0.0320; 11.2374 (246.40)   | 0.0197; 19.6127 (248.12)                                     | 0.0120; 5.1649 (246.61)    | 0.0103; 4.6582 (245.60)    |
| 2   | 0.0063; 3.3170 (241.39)    | 0.0023; -0.6244 (244.91)   | 0.0049; -0.6649 (242.39)                                     | 0.0088; -7.9837 (242.42)   | 0.0102; 2.9310 (243.48)    |
| 3   | 0.0169; 4.5492 (234.58)    | 0.0712; 183.3188 (237.31)  | 0.0480; 211.9424 (235.15)                                    | 0.0441; 22.0896 (235.15)   | 0.0471; -20.2529 (233.62)  |
| 4   | 0.1983; -220.2606 (231.77) | 0.0390; 61.4161 (231.23)   | 0.0571; 178.4258 (232.03)                                    | 0.1308; 70.8633 (233.69)   | 0.6056; -59.0394 (230.10)  |
| 5   | 0.6071; 125.9492 (229.26)  | 0.7042; -289.2800 (229.19) | 0.5939; -395.7513 (230.34)                                   | 0.4940; -95.2692 (228.77)  | 0.0925; -7.6039 (229.40)   |
| 6   | 0.0033; -4.4291 (227.93)   | 0.0094; 17.6287 (223.08)   | 0.0063; -2.8186 (227.01)                                     | 0.1079; -8.8922 (226.69)   | 0.0007; 1.7640 (222.82)    |
| 7   | 0.0069; 7.7512 (215.36)    | 0.0334; 23.9464 (221.96)   | 0.0080; 8.8573 (217.04)                                      | 0.0061; 7.3749 (219.88)    | 0.0057; -0.7442 (221.01)   |
| 8   | 0.0194; 6.5047 (211.05)    | 0.0279; 20.2506 (218.03)   | 0.0470; -5.7710 (212.28)                                     | 0.0006; -0.9555 (216.11)   | 0.0251; -7.6665 (217.95)   |
| 9   | 0.1086; 1.5103 (201.93)    | 0.1483; -9.7017 (203.01)   | 0.0447; -125.0216 (208.37)                                   | 0.0133; -6.7852 (203.05)   | 0.0563; 77.8770 (203.94)   |
| 10  | 0.2387; 55.3511 (198.51)   | 0.2235; 221.9954 (200.37)  | 0.0222; 93.0010 (203.15)                                     | 0.0370; 27.6391 (200.87)   | 0.0508; 53.6783 (202.67)   |
| 11  | 0.0648; -43.9251 (197.75)  | 0.0223; -109.2281 (197.84) | 0.1846; -127.2194 (199.89)                                   | 0.0429; -15.2076 (199.13)  | 0.0202; -42.3916 (201.35)  |
| 12  | 0.0613; 15.0736 (196.33)   | 0.0140; 61.6783 (195.56)   | 0.0843; 33.6134 (197.66)                                     | 0.0890; -75.7996 (197.86)  | 0.1150; -10.3059 (198.49)  |
| 13  | 0.1480; 543.0479 (195.16)  | 0.1299; -1.6286 (195.03)   | 0.1441; 435.2036 (194.57)                                    | 0.0499; 75.5154 (196.61)   | 0.1425; 76.3771 (195.57)   |
| 14  | 0.3087; -331.1330 (193.84) | 0.0521; -62.7518 (193.83)  | 0.1180; -13.9183 (193.65)                                    | 0.2544; -389.9577 (195.35) | 0.1627; -171.0511 (195.09) |
| 15  | 0.0509; -344.7369 (191.92) | 0.1428; -0.4467 (191.30)   | 0.8528; -316.4647 (190.88)                                   | 0.0447; 295.0773 (192.84)  | 0.6160; 52.8830 (190.98)   |
| 16  | 0.0309; -76.7650 (190.58)  | 0.5825; -128.5293 (190.87) | 0.0149; 24.5204 (189.92)                                     | 0.9296; -83.4756 (190.92)  | 0.1745; 117.1897 (189.87)  |
| 17  | 0.7299; 233.7090 (189.66)  | 0.1101; -56.9468 (189.68)  | 0.0727; -104.0191 (189.32)                                   | 0.0724; 91.7474 (189.81)   | 0.2369; -115.9526 (189.39) |
| 18  | 0.0256; 39.5530 (184.95)   | 0.1165; 177.0168 (188.58)  | 0.0213; -8.4381 (185.35)                                     | 0.0343; 16.9001 (185.40)   | 0.0188; 43.9336 (185.28)   |
| 19  | 0.0018; -0.0215 (183.97)   | 0.0894; -49.6757 (186.89)  | 0.0340; 52.1223 (184.07)                                     | 0.1193; 52.3252 (183.68)   | 0.0045; 3.1923 (181.47)    |
| 20  | 0.0088; -3.5800 (182.02)   | 0.0087; -34.0409 (185.64)  | 0.0062; 4.8479 (183.02)                                      | 0.0160; 24.0445 (182.83)   | 0.0925; -39.2036 (181.20)  |
| 21  | 0.0809; -49.0299 (180.48)  | 0.0833; -68.2775 (180.85)  | 0.0435; -44.3436 (180.64)                                    | 0.0066; 4.3460 (182.20)    | 0.0361; 8.6454 (179.81)    |
| 22  | 0.0048; -3.4872 (178.00)   | 0.1393; 87.3084 (178.99)   | 0.0506; 41.3750 (179.87)                                     | 0.0709; -47.6010 (179.89)  | 0.0491; -23.2999 (179.62)  |
| 23  | 0.0198; 6.0043 (175.67)    | 0.1021; -71.5170 (177.96)  | 0.0613; -89.9116 (179.64)                                    | 0.0403; 4.3785 (177.30)    | 0.0161; -5.1634 (177.54)   |
| 24  | 0.0015; 0.1027 (175.05)    | 0.0016; -0.5220 (175.32)   | 0.0210; -3.1743 (174.26)                                     | 0.0083; 2.6518 (174.75)    | 0.0128; 1.8670 (173.29)    |
| 25  | 0.0008; -0.6633 (172.51)   | 0.0104; 5.7102 (174.20)    | 0.0053; -0.2329 (172.28)                                     | 0.0025; 2.5388 (173.22)    | 0.0126; 4.8057 (172.98)    |
| 26  | 0.0215; -6.6107 (172.36)   | 0.0017; -1.0131 (173.04)   | 0.0016; 3.6246 (171.19)                                      | 0.0004; 0.4660 (172.35)    | 0.0040; -0.7449 (170.86)   |
| 27  | 0.0047; -2.9837 (171.62)   | 0.0036; -3.1872 (172.12)   | 0.0077; -1.0129 (171.00)                                     | 0.0001; -2.6584 (171.67)   | 0.0136; -4.0028 (170.81)   |
| 28  | 0.0038; -3.5756 (168.60)   | 0.0023; -3.6478 (171.76)   | 0.0108; 4.5473 (170.40)                                      | 0.0018; -3.5635 (171.25)   | 0.0317; -3.5829 (170.44)   |
| 29  | 0.0009; -2.0817 (168.41)   | 0.0013; -1.0899 (171.40)   | 0.0062; 0.1017 (168.10)                                      | 0.0056; -4.1125 (170.83)   | 0.0010; -0.9827 (168.48)   |
| 30  | 0.0009; 1.2015 (168.35)    | 0.0028; -8.0420 (170.00)   | 0.0031; 2.9100 (167.83)                                      | 0.0129; 2.9542 (170.27)    | 0.0606; -41.6895 (168.12)  |
| 31  | 0.0874; 26.5563 (167.28)   | 0.0022; -0.2133 (169.81)   | 0.0460; -1.4150 (167.54)                                     | 0.0033; -0.4063 (169.45)   | 0.0024; 4.9125 (167.22)    |
| 32  | 0.0305; 16.7338 (165.84)   | 0.0051; -8.9457 (169.55)   | 0.0122; -1.9324 (166.95)                                     | 0.0030; 2.3095 (168.05)    | 0.0241; 45.3112 (167.06)   |
| 33  | 0.0545; 11.5961 (165.01)   | 0.0163; -6.7013 (169.23)   | 0.0178; -1.8562 (166.17)                                     | 0.0135; 4.3941 (167.92)    | 0.0983; -6.2409 (166.18)   |
| 34  | 0.0796; -20.6670 (164.90)  | 0.0048; 0.6684 (168.08)    | 0.0059; 9.1252 (166.10)                                      | 0.0506; 14.7461 (165.98)   | 0.0004; 1.2507 (165.84)    |
| 35  | 0.0591; 6.6754 (164.61)    | 0.0010; -0.7469 (167.34)   | 0.0532; 34.8106 (165.92)                                     | 0.0010; 0.8421 (165.23)    | 0.1011; -7.0153 (164.60)   |
| 36  | 0.0056; 2.9893 (164.01)    | 0.0301; 26.5299 (166.84)   | 0.0764; 3.7038 (165.50)                                      | 0.0092; 10.1431 (164.95)   | 0.0091; -10.1733 (164.12)  |
| 37  | 0.0077; 4.8954 (163.27)    | 0.0006; 3.0160 (166.13)    | 0.0096; 1.6538 (164.87)                                      | 0.0074; -2.2988 (164.50)   | 0.0056; 3.0065 (164.02)    |
| 38  | 0.0008; 3.3163 (162.72)    | 0.0032; -11.7665 (165.17)  | 0.0354; -13.9773 (164.17)                                    | 0.0095; -13.8427 (164.24)  | 0.0211; 4.3853 (163.83)    |
| 39  | 0.0008; -0.0449 (162.56)   | 0.0021; 0.7589 (165.13)    | 0.0074; 8.0184 (163.89)                                      | 0.0794; 65.7719 (164.08)   | 0.0212; 11.8674 (163.47)   |
| 40  | 0.0023; -2.4648 (162.25)   | 0.0045; -4.6281 (164.94)   | 0.0239; -3.1523 (163.60)                                     | 0.0134; 14.2737 (163.94)   | 0.0022; 0.2610 (162.82)    |
| 41  | 0.0003; 0.2318 (161.88)    | 0.0007; 2.0282 (164.67)    | 0.0099; -10.2828 (163.32)                                    | 0.0742; -55.2663 (163.61)  | 0.0036; -1.4107 (162.62)   |
| 42  | 0.0178; -15.0186 (161.61)  | 0.0252; -10.5170 (162.50)  | 0.0240; 9.4650 (163.27)                                      | 0.0217; -16.5240 (163.32)  | 0.0090; -7.6152 (161.96)   |
| 43  | 0.0108; 13.8954 (161.41)   | 0.0040; 8.0117 (162.22)    | 0.0039; -10.2229 (162.85)                                    | 0.0027; -2.2526 (162.95)   | 0.0362; -11.5431 (161.75)  |
| 44  | 0.0018; -1.0350 (161.25)   | 0.0220; 6.8374 (161.92)    | 0.0414; -16.2552 (162.75)                                    | 0.0202; -1.8405 (162.54)   | 0.0179; -0.9379 (161.64)   |
| 45  | 0.0341; -11.5121 (160.88)  | 0.0038; -3.5016 (161.65)   | 0.0259; -5.6118 (162.47)                                     | 0.0196; -16.6128 (162.12)  | 0.0117; -3.0008 (161.36)   |
| 46  | 0.0247; 1.2556 (160.37)    | 0.0158; -0.4745 (161.49)   | 0.0099; -11.2002 (162.27)                                    | 0.0078; 0.0705 (161.42)    | 0.0009; 4.0949 (161.01)    |
| 47  | 0.0025; 1.2217 (159.76)    | 0.0022; -0.9267 (160.09)   | 0.0094; 2.6248 (161.40)                                      | 0.0097; -1.9540 (161.30)   | 0.0012; -1.1906 (160.77)   |
| 48  | 0.0130; 15.5780 (159.55)   | 0.0014; -1.0134 (159.94)   | 0.0021; -5.7719 (160.98)                                     | 0.0056; 20.7178 (160.18)   | 0.0010; -2.2029 (160.66)   |
| 49  | 0.0001; 0.0554 (159.13)    | 0.0759; -15.2773 (159.53)  | 0.0072; -3.9924 (160.70)                                     | 0.0062; -10.9056 (159.97)  | 0.0054; 7.9585 (160.26)    |
| 50  | 0.0046; -1.1348 (158.79)   | 0.0308; -37.4179 (159.45)  | 0.0391; 0.8224 (160.50)                                      | 0.0438; -10.6804 (159.87)  | 0.0038; -2.1116 (160.24)   |

Table S2. (Continued)

| <i>j</i> | $f_j; R_j, 10^{-40} \text{ erg cm}^3 (\lambda_j, \text{nm})$ |                            |                            |                            |                            |
|----------|--------------------------------------------------------------|----------------------------|----------------------------|----------------------------|----------------------------|
|          | c177                                                         | c184                       | c185                       | c195                       | c200                       |
| 1        | 0.0090; -25.0679 (248.79)                                    | 0.0104; 3.7226 (246.21)    | 0.0150; -15.0801 (247.62)  | 0.0152; -2.9025 (245.70)   | 0.0120; 8.1747 (246.78)    |
| 2        | 0.0258; 33.1100 (245.00)                                     | 0.0192; -8.0527 (245.75)   | 0.0104; 2.6055 (244.69)    | 0.0012; -2.8919 (240.74)   | 0.0090; -10.1433 (242.33)  |
| 3        | 0.0120; 10.3486 (240.05)                                     | 0.6837; 439.2465 (232.14)  | 0.0079; -79.3220 (237.11)  | 0.0706; 37.4100 (236.28)   | 0.0304; 13.7848 (235.29)   |
| 4        | 0.1440; -82.1320 (235.94)                                    | 0.1769; -452.6538 (230.40) | 0.0272; -269.0740 (233.75) | 0.1976; 293.6548 (231.09)  | 0.1591; 71.9251 (233.93)   |
| 5        | 0.0343; -58.5696 (230.47)                                    | 0.0009; 0.7564 (224.12)    | 0.7000; 374.8839 (231.49)  | 0.0163; -19.7342 (228.33)  | 0.4637; -93.3327 (228.65)  |
| 6        | 0.5089; 164.3389 (228.79)                                    | 0.0000; 0.0323 (220.42)    | 0.0631; 32.3777 (228.11)   | 0.3697; -262.3258 (227.52) | 0.1104; -11.3831 (226.76)  |
| 7        | 0.0765; 5.0480 (221.19)                                      | 0.0000; -0.0126 (210.65)   | 0.0091; -0.7602 (220.43)   | 0.0100; -5.1167 (215.35)   | 0.0092; 6.7358 (219.54)    |
| 8        | 0.0049; 5.7335 (218.66)                                      | 0.0000; 0.0245 (204.89)    | 0.0347; 1.0995 (216.05)    | 0.0004; -3.0409 (211.85)   | 0.0014; -2.0503 (215.68)   |
| 9        | 0.0301; 43.9724 (207.32)                                     | 0.1857; 72.7670 (197.75)   | 0.0251; 86.3334 (209.36)   | 0.0138; -6.6786 (206.97)   | 0.0177; -10.4172 (203.18)  |
| 10       | 0.1763; -125.3798 (204.56)                                   | 0.2634; -126.3810 (195.45) | 0.0194; -73.7010 (204.25)  | 0.0047; -2.9361 (202.21)   | 0.0420; 42.6809 (200.92)   |
| 11       | 0.1106; 124.2420 (202.13)                                    | 0.0030; -3.6474 (193.97)   | 0.1993; 65.4914 (199.57)   | 0.0505; -59.1278 (199.38)  | 0.0522; -27.4487 (199.13)  |
| 12       | 0.0668; 55.9393 (199.73)                                     | 0.5820; 412.4387 (193.52)  | 0.0946; 115.8274 (197.82)  | 0.2692; -20.3208 (196.81)  | 0.0937; -93.9587 (198.06)  |
| 13       | 0.0117; -101.3471 (196.99)                                   | 0.2825; -222.8630 (191.64) | 0.1540; -346.0475 (195.14) | 0.1403; 27.0895 (196.17)   | 0.0528; 103.9484 (196.45)  |
| 14       | 0.2148; 372.7058 (194.58)                                    | 0.0145; -9.5350 (191.49)   | 0.1238; -28.0272 (193.55)  | 0.0371; -6.1275 (194.78)   | 0.2486; -410.7641 (195.23) |
| 15       | 0.0812; -229.1275 (192.44)                                   | 0.0443; -86.0420 (190.99)  | 0.6952; 60.2600 (190.89)   | 0.2190; 515.6399 (191.79)  | 0.0437; 306.4958 (192.74)  |
| 16       | 0.2363; -50.5710 (189.79)                                    | 0.2172; -31.2772 (190.12)  | 0.0499; 52.8659 (190.43)   | 0.4524; -537.2430 (191.00) | 0.8674; -92.9011 (190.89)  |
| 17       | 0.1399; -209.9689 (189.51)                                   | 0.0068; -0.2327 (188.59)   | 0.2804; 165.0480 (189.38)  | 0.2795; 7.7745 (189.93)    | 0.0728; 96.0461 (189.87)   |
| 18       | 0.3684; 166.0577 (188.82)                                    | 0.0102; -25.9143 (188.21)  | 0.0051; -20.2723 (184.71)  | 0.0103; 1.5033 (187.02)    | 0.0675; 21.8009 (186.32)   |
| 19       | 0.0133; -13.1826 (185.00)                                    | 0.0000; -0.1164 (185.95)   | 0.0162; 21.3850 (183.86)   | 0.0088; -14.1875 (184.39)  | 0.0939; 20.3747 (184.15)   |
| 20       | 0.1496; -77.6026 (183.66)                                    | 0.0000; -0.0005 (181.74)   | 0.0076; -8.6345 (182.04)   | 0.0506; 69.6764 (184.18)   | 0.0419; 55.0048 (183.19)   |
| 21       | 0.0757; 46.3990 (183.05)                                     | 0.0034; -0.1070 (177.68)   | 0.0106; -4.2404 (181.95)   | 0.0025; -8.6487 (181.08)   | 0.0028; 0.2267 (181.91)    |
| 22       | 0.0745; 29.3746 (178.39)                                     | 0.0111; -5.7439 (177.32)   | 0.0791; 8.7897 (178.47)    | 0.0103; -17.0796 (179.77)  | 0.0705; -50.3348 (180.15)  |
| 23       | 0.0053; 8.4642 (177.58)                                      | 0.0792; 8.4663 (174.40)    | 0.0845; 43.7928 (177.56)   | 0.0376; 9.9279 (179.18)    | 0.0368; 3.7940 (177.32)    |
| 24       | 0.0527; -14.7378 (176.29)                                    | 0.0056; 0.1668 (173.71)    | 0.0061; 2.9570 (173.01)    | 0.0226; 19.8523 (177.13)   | 0.0120; 6.8873 (174.14)    |
| 25       | 0.0111; 11.6516 (174.90)                                     | 0.0042; 1.0596 (173.39)    | 0.0017; 0.1660 (172.35)    | 0.0019; 4.8092 (172.18)    | 0.0013; 1.1291 (173.40)    |
| 26       | 0.0022; -1.6400 (174.64)                                     | 0.0010; -3.8911 (172.23)   | 0.0118; 0.9714 (172.20)    | 0.0028; -4.4193 (172.03)   | 0.0008; -0.4555 (172.43)   |
| 27       | 0.0009; -1.1358 (173.17)                                     | 0.0436; 22.0208 (172.11)   | 0.0026; -0.8421 (170.12)   | 0.0006; -0.2299 (171.88)   | 0.0001; -2.8601 (172.18)   |
| 28       | 0.0157; -17.3214 (172.80)                                    | 0.0000; 0.1667 (170.63)    | 0.0012; -1.1239 (169.77)   | 0.0052; -0.0758 (171.77)   | 0.0050; -6.8829 (171.33)   |
| 29       | 0.0216; 3.3921 (171.91)                                      | 0.0039; 1.5380 (170.06)    | 0.0193; 14.8803 (169.23)   | 0.0263; -7.2152 (170.89)   | 0.0049; -5.1155 (170.92)   |
| 30       | 0.0067; -8.4965 (171.35)                                     | 0.0073; 15.5658 (168.70)   | 0.0097; -7.7205 (168.67)   | 0.0004; 1.2046 (168.90)    | 0.0159; 5.5823 (170.72)    |
| 31       | 0.0004; -1.0225 (168.94)                                     | 0.0686; -18.0033 (167.41)  | 0.0103; -12.9438 (168.64)  | 0.0661; 28.4333 (167.96)   | 0.0013; 0.7981 (170.04)    |
| 32       | 0.0011; -2.7518 (168.62)                                     | 0.0330; 9.9053 (167.05)    | 0.0093; -3.1892 (167.31)   | 0.0228; -0.9545 (167.58)   | 0.0012; 1.5349 (168.14)    |
| 33       | 0.0056; -1.9224 (168.39)                                     | 0.0104; -1.2386 (166.88)   | 0.0119; 4.1592 (166.35)    | 0.0021; -0.6368 (167.01)   | 0.0364; 15.6375 (167.27)   |
| 34       | 0.0057; -1.6358 (167.28)                                     | 0.0013; -5.4230 (166.77)   | 0.0553; 3.5496 (166.23)    | 0.0221; 38.0129 (166.45)   | 0.0013; -2.3458 (166.46)   |
| 35       | 0.0031; 19.7291 (166.81)                                     | 0.0025; 0.5164 (166.42)    | 0.0021; -2.2433 (165.86)   | 0.0422; 75.5217 (166.24)   | 0.0388; 15.0287 (165.70)   |
| 36       | 0.0248; 9.6414 (165.97)                                      | 0.0139; -15.2644 (164.84)  | 0.0073; -2.8260 (165.33)   | 0.0145; -39.4687 (165.87)  | 0.0054; 6.9644 (165.25)    |
| 37       | 0.0273; -25.2387 (165.61)                                    | 0.0015; 1.5092 (164.35)    | 0.0095; -1.7710 (164.73)   | 0.0294; 9.3781 (165.71)    | 0.0034; 2.7040 (164.72)    |
| 38       | 0.0115; -10.4776 (165.39)                                    | 0.0003; -0.0198 (164.20)   | 0.0179; -9.2372 (164.24)   | 0.0335; 13.0536 (165.43)   | 0.0217; -2.4019 (164.53)   |
| 39       | 0.0277; -28.6865 (164.65)                                    | 0.0006; 0.0835 (163.85)    | 0.0088; -11.2370 (164.14)  | 0.0348; -13.7323 (165.17)  | 0.0553; 57.9575 (164.24)   |
| 40       | 0.0003; 1.2094 (164.32)                                      | 0.0074; -2.2634 (163.77)   | 0.0109; -4.2568 (163.62)   | 0.0778; -31.9402 (165.10)  | 0.0250; -4.4708 (164.10)   |
| 41       | 0.0076; 5.3931 (164.10)                                      | 0.0075; 4.2655 (163.54)    | 0.0265; 2.7049 (163.60)    | 0.0572; -2.1048 (164.70)   | 0.0237; -13.1475 (163.99)  |
| 42       | 0.0378; -74.5730 (163.67)                                    | 0.0002; 0.7067 (162.39)    | 0.0346; -37.9483 (163.16)  | 0.0129; -1.7278 (163.99)   | 0.0672; -49.0950 (163.68)  |
| 43       | 0.0233; -8.2129 (163.09)                                     | 0.0017; -0.2065 (162.09)   | 0.0076; 3.2906 (162.60)    | 0.0046; -9.8470 (162.91)   | 0.0071; 1.0716 (163.00)    |
| 44       | 0.0292; 52.5326 (163.03)                                     | 0.0033; -1.1356 (161.79)   | 0.0305; 32.6862 (162.25)   | 0.0087; -15.8418 (162.80)  | 0.0152; 0.0640 (162.92)    |
| 45       | 0.0135; 28.3094 (162.80)                                     | 0.0058; 5.7912 (161.00)    | 0.0123; 2.9855 (162.07)    | 0.0020; 0.1702 (162.71)    | 0.0306; -25.0492 (162.59)  |
| 46       | 0.0041; -10.8914 (161.39)                                    | 0.0015; -1.4761 (160.74)   | 0.0064; -7.7931 (161.53)   | 0.0343; -4.8834 (161.77)   | 0.0052; -3.0601 (161.76)   |
| 47       | 0.0028; -0.4992 (161.22)                                     | 0.0020; -0.8030 (160.49)   | 0.0058; 2.5330 (161.42)    | 0.0037; -7.3937 (161.62)   | 0.0153; 2.4967 (161.38)    |
| 48       | 0.0144; 17.7341 (160.84)                                     | 0.0224; 18.8002 (160.30)   | 0.0030; -0.8196 (161.14)   | 0.0041; 1.4282 (160.82)    | 0.0013; 0.5272 (160.78)    |
| 49       | 0.0097; -23.6558 (160.49)                                    | 0.0227; -1.8015 (159.81)   | 0.0048; 8.3858 (161.11)    | 0.0021; -0.1158 (160.71)   | 0.0032; 12.1269 (160.58)   |
| 50       | 0.0185; 7.1824 (160.41)                                      | 0.0058; -7.6534 (159.77)   | 0.0079; -4.6581 (160.77)   | 0.0118; 0.3207 (160.59)    | 0.0038; -8.5364 (160.31)   |

Table S2. (Continued)

| <i>j</i> | $f_j; R_j, 10^{-40} \text{ erg cm}^3 (\lambda_j, \text{nm})$ |                           |                            |                            |                            |
|----------|--------------------------------------------------------------|---------------------------|----------------------------|----------------------------|----------------------------|
|          | c205                                                         | c207                      | c217                       | c231                       | c242                       |
| 1        | 0.0207; 41.6953 (247.37)                                     | 0.0105; 11.1202 (245.63)  | 0.0109; 1.3851 (242.50)    | 0.0104; -1.2906 (243.58)   | 0.0091; 2.5450 (243.44)    |
| 2        | 0.0073; -23.4059 (246.17)                                    | 0.0117; -0.0212 (243.69)  | 0.0064; 2.4604 (241.74)    | 0.0071; -4.1741 (242.85)   | 0.0063; -4.0538 (241.17)   |
| 3        | 0.0098; -16.8926 (241.74)                                    | 0.0750; 18.0652 (234.09)  | 0.5168; -29.5216 (229.81)  | 0.1844; -315.5729 (232.67) | 0.1495; 123.5800 (232.31)  |
| 4        | 0.0443; 200.1681 (237.84)                                    | 0.6310; -95.9636 (230.20) | 0.2462; 6.4110 (226.93)    | 0.1140; 86.8508 (231.04)   | 0.1874; -132.1859 (228.27) |
| 5        | 0.2256; -96.5397 (234.09)                                    | 0.0443; -5.7879 (229.55)  | 0.0002; 0.1606 (214.48)    | 0.2681; 110.0442 (227.79)  | 0.1102; -24.9382 (225.88)  |
| 6        | 0.5726; -118.0688 (229.55)                                   | 0.0003; 1.6626 (223.20)   | 0.0003; 0.1736 (212.36)    | 0.0331; -20.3816 (222.11)  | 0.0264; -37.4282 (225.00)  |
| 7        | 0.0029; 11.8303 (227.71)                                     | 0.0005; 0.4708 (221.28)   | 0.0000; 0.0642 (209.71)    | 0.0162; 2.0274 (217.56)    | 0.0986; 53.2091 (219.21)   |
| 8        | 0.0421; 4.6926 (223.67)                                      | 0.0320; -11.7165 (218.06) | 0.0002; 0.0791 (205.74)    | 0.0447; 48.6211 (214.52)   | 0.0056; -22.0054 (216.43)  |
| 9        | 0.0080; -20.5480 (209.09)                                    | 0.0768; 50.2790 (204.35)  | 0.2419; -10.8872 (196.54)  | 0.0258; 56.7425 (207.73)   | 0.0096; -23.7109 (206.22)  |
| 10       | 0.0685; 65.7214 (204.23)                                     | 0.0344; 28.9641 (202.98)  | 0.2156; 36.6937 (195.50)   | 0.0267; 55.3533 (202.34)   | 0.0028; -36.4399 (203.09)  |
| 11       | 0.0034; 1.9619 (202.71)                                      | 0.0386; -0.3220 (201.42)  | 0.6026; 264.6890 (193.20)  | 0.1151; 66.2577 (197.97)   | 0.0251; -24.8180 (199.54)  |
| 12       | 0.0092; -50.0374 (200.24)                                    | 0.1152; 4.2313 (198.62)   | 0.3213; -220.0086 (192.37) | 0.1010; -15.3041 (196.75)  | 0.0758; 37.3120 (197.17)   |
| 13       | 0.0427; 134.0745 (198.87)                                    | 0.1143; -7.9778 (195.25)  | 0.0046; -3.2051 (190.41)   | 0.2704; -123.6220 (194.52) | 0.0883; -49.9719 (195.46)  |
| 14       | 0.2532; -495.7489 (194.75)                                   | 0.1824; -72.8410 (194.84) | 0.0007; 1.0151 (190.39)    | 0.0425; -276.3712 (193.33) | 0.3909; 177.0091 (193.97)  |
| 15       | 0.1421; 358.4367 (193.40)                                    | 0.6550; 25.8549 (191.13)  | 0.0001; -0.0359 (188.31)   | 0.2522; -67.6108 (192.25)  | 0.2108; 117.3334 (193.11)  |
| 16       | 0.0051; 23.9498 (190.99)                                     | 0.0534; 92.0267 (189.82)  | 0.1400; -130.6736 (187.76) | 0.4396; 252.8330 (190.44)  | 0.2960; -270.7441 (192.25) |
| 17       | 0.9348; -28.6037 (190.58)                                    | 0.2955; -87.5092 (189.12) | 0.0338; 60.1715 (184.09)   | 0.0221; 26.7153 (187.70)   | 0.2150; 19.9615 (188.21)   |
| 18       | 0.0098; 16.0334 (186.98)                                     | 0.0113; 30.6603 (186.19)  | 0.0044; -9.3539 (183.51)   | 0.0744; 81.3157 (186.01)   | 0.0384; 65.5327 (184.07)   |
| 19       | 0.0189; -14.1463 (185.87)                                    | 0.0161; 11.1460 (181.53)  | 0.0006; -1.3494 (183.44)   | 0.0634; -49.1685 (184.91)  | 0.0187; 8.8829 (183.43)    |
| 20       | 0.0162; 40.0470 (185.31)                                     | 0.1504; -59.7109 (180.95) | 0.0581; -48.8579 (180.12)  | 0.0477; 50.4661 (184.32)   | 0.0129; 14.4548 (182.10)   |
| 21       | 0.0175; 3.4887 (184.30)                                      | 0.0105; 0.6367 (180.31)   | 0.0092; -1.9418 (178.91)   | 0.0065; -1.1379 (182.16)   | 0.0013; -0.0988 (181.89)   |
| 22       | 0.2430; -53.9015 (179.63)                                    | 0.0300; -9.4539 (179.42)  | 0.0042; 12.1074 (178.28)   | 0.0259; -29.5894 (180.97)  | 0.0054; 4.3661 (180.39)    |
| 23       | 0.0009; -1.9769 (178.05)                                     | 0.0164; -1.7359 (177.36)  | 0.0076; 2.5120 (175.35)    | 0.0688; 58.3313 (180.48)   | 0.0054; -15.1761 (179.81)  |
| 24       | 0.0093; -14.0418 (177.59)                                    | 0.0039; -8.4323 (173.68)  | 0.0006; 0.3918 (173.92)    | 0.0020; -1.0337 (175.43)   | 0.0147; -19.7016 (179.24)  |
| 25       | 0.0086; -14.1385 (175.92)                                    | 0.0216; 15.4823 (173.36)  | 0.0014; 0.9256 (172.63)    | 0.0047; 2.5826 (175.03)    | 0.0023; 0.6252 (174.15)    |
| 26       | 0.0489; 5.2786 (174.90)                                      | 0.0011; -2.0265 (171.48)  | 0.0392; 0.9189 (170.40)    | 0.0035; -1.1060 (172.88)   | 0.0138; 8.3225 (172.98)    |
| 27       | 0.0009; -1.7811 (173.38)                                     | 0.0277; -2.3946 (171.19)  | 0.0022; -0.7431 (170.16)   | 0.0039; -0.9745 (170.84)   | 0.0100; -18.8418 (172.68)  |
| 28       | 0.0004; 0.7316 (173.22)                                      | 0.0333; -9.0806 (170.10)  | 0.0027; -0.2774 (169.97)   | 0.0145; 2.2214 (170.75)    | 0.0378; -6.1355 (172.19)   |
| 29       | 0.0013; 0.7740 (172.72)                                      | 0.0021; -0.0608 (169.20)  | 0.0083; 1.9519 (169.20)    | 0.0276; 11.1486 (169.62)   | 0.0133; -3.9132 (170.68)   |
| 30       | 0.0022; -3.3632 (171.78)                                     | 0.0566; -32.9450 (168.30) | 0.0015; -0.3788 (168.60)   | 0.0127; -9.0649 (169.11)   | 0.0087; 15.6029 (170.19)   |
| 31       | 0.0255; -2.6292 (169.32)                                     | 0.0037; -0.1035 (167.49)  | 0.0033; -3.8058 (168.46)   | 0.0066; 9.9568 (168.41)    | 0.0405; 31.0541 (169.94)   |
| 32       | 0.0035; 3.1017 (169.14)                                      | 0.0233; 43.2133 (166.96)  | 0.0690; -32.1617 (167.71)  | 0.0036; 1.2460 (168.15)    | 0.0041; -2.5943 (169.59)   |
| 33       | 0.0510; 6.7449 (168.53)                                      | 0.0017; -1.3380 (166.24)  | 0.0839; 34.7719 (166.16)   | 0.0262; -36.6725 (167.40)  | 0.0421; 5.9919 (168.71)    |
| 34       | 0.0010; -6.4002 (168.12)                                     | 0.0727; -1.9106 (165.98)  | 0.1079; -43.4580 (165.63)  | 0.0200; 9.0569 (166.87)    | 0.0020; -4.7910 (168.11)   |
| 35       | 0.0029; 0.1590 (167.33)                                      | 0.0042; 2.4673 (165.13)   | 0.0007; 3.3777 (165.47)    | 0.0434; 76.8983 (166.48)   | 0.0086; 9.9813 (167.97)    |
| 36       | 0.0042; 19.7967 (166.95)                                     | 0.0185; 9.6064 (164.85)   | 0.0067; 0.4357 (164.52)    | 0.0231; 1.5663 (165.58)    | 0.0098; -13.7305 (167.26)  |
| 37       | 0.0066; 18.2392 (166.70)                                     | 0.1020; -38.6431 (164.59) | 0.0086; 0.9972 (164.35)    | 0.0551; 11.0560 (165.17)   | 0.0348; -1.5337 (166.60)   |
| 38       | 0.0016; 0.8570 (163.94)                                      | 0.0147; 7.4016 (163.88)   | 0.0061; -10.3913 (163.79)  | 0.0353; -23.0457 (164.71)  | 0.0275; 39.0951 (166.36)   |
| 39       | 0.0026; 0.7076 (163.85)                                      | 0.0202; 15.4392 (163.66)  | 0.1732; 2.6470 (163.64)    | 0.0356; -2.0661 (164.39)   | 0.0173; 24.0310 (165.93)   |
| 40       | 0.0002; 1.5142 (163.41)                                      | 0.0115; 5.8317 (163.11)   | 0.0031; -8.5206 (163.32)   | 0.0223; 3.3944 (163.42)    | 0.0014; -3.5993 (165.45)   |
| 41       | 0.0017; -2.7912 (163.28)                                     | 0.0004; -2.9994 (162.87)  | 0.0151; -24.1870 (162.91)  | 0.0658; -18.9416 (163.26)  | 0.0449; 53.1346 (165.37)   |
| 42       | 0.0016; -4.2183 (162.20)                                     | 0.0068; -4.5242 (162.80)  | 0.0032; -0.1557 (161.58)   | 0.0121; 0.6378 (162.93)    | 0.1113; 9.4752 (164.85)    |
| 43       | 0.0024; -12.4026 (162.00)                                    | 0.0028; 0.3513 (162.44)   | 0.0009; 4.0994 (161.45)    | 0.0282; 23.5543 (162.83)   | 0.0409; -5.3761 (164.77)   |
| 44       | 0.0005; -3.3647 (161.78)                                     | 0.0099; -6.1130 (161.95)  | 0.0028; 4.1601 (161.32)    | 0.0355; -9.0240 (162.79)   | 0.0074; 3.2824 (164.43)    |
| 45       | 0.0021; -1.3390 (161.60)                                     | 0.0352; -8.8863 (161.73)  | 0.0109; -0.9088 (160.91)   | 0.0186; 6.0693 (161.74)    | 0.0825; 18.7146 (163.98)   |
| 46       | 0.0312; -8.8949 (161.43)                                     | 0.0221; 3.6668 (161.36)   | 0.0022; 1.3949 (160.12)    | 0.0328; -24.7650 (161.53)  | 0.0232; -31.1909 (163.73)  |
| 47       | 0.0027; 0.4837 (160.71)                                      | 0.0029; 5.2191 (160.84)   | 0.0046; 2.0040 (160.09)    | 0.0006; -3.4127 (161.22)   | 0.0487; 15.9391 (163.17)   |
| 48       | 0.0037; -8.1028 (160.56)                                     | 0.0008; -1.7298 (160.79)  | 0.0042; -0.3485 (159.94)   | 0.0043; -6.3985 (160.51)   | 0.0034; -6.9706 (162.78)   |
| 49       | 0.0144; 25.2142 (160.28)                                     | 0.0020; 1.8374 (160.50)   | 0.0087; -4.2467 (159.67)   | 0.0004; -1.0211 (160.48)   | 0.0025; 2.4279 (162.42)    |
| 50       | 0.0136; 4.1219 (160.12)                                      | 0.0047; 2.5975 (160.25)   | 0.0044; -4.1058 (159.45)   | 0.0005; 1.4165 (160.06)    | 0.0100; -9.9264 (162.09)   |

Table S2. (Continued)

| <i>j</i> | $f_j; R_j, 10^{-40} \text{ erg cm}^3 (\lambda_j, \text{nm})$ |                            |                            |                            |                            |
|----------|--------------------------------------------------------------|----------------------------|----------------------------|----------------------------|----------------------------|
|          | c247                                                         | c248                       | c258                       | c263                       | c284                       |
| 1        | 0.0068; 11.6114 (250.17)                                     | 0.0158; 6.4668 (244.57)    | 0.0172; -6.3974 (245.57)   | 0.0189; -5.2667 (245.34)   | 0.0145; 5.4107 (247.63)    |
| 2        | 0.0047; -6.8128 (249.07)                                     | 0.0041; -0.8056 (243.47)   | 0.0113; -0.8428 (244.47)   | 0.0131; -0.7546 (244.01)   | 0.0113; -5.6907 (242.96)   |
| 3        | 0.1007; -46.0696 (241.09)                                    | 0.0291; 178.3205 (233.55)  | 0.5050; 241.4092 (232.24)  | 0.4440; 167.0435 (231.95)  | 0.1820; 268.4576 (233.24)  |
| 4        | 0.0169; -29.5668 (238.38)                                    | 0.6290; -214.6973 (230.23) | 0.1944; -155.9759 (229.34) | 0.3010; -114.5640 (229.09) | 0.2387; -94.4743 (230.49)  |
| 5        | 0.1632; -47.9460 (233.77)                                    | 0.1085; -15.5304 (225.64)  | 0.0724; -125.5906 (229.11) | 0.0347; 36.4769 (228.84)   | 0.0373; -30.1173 (222.99)  |
| 6        | 0.3484; 187.3725 (228.26)                                    | 0.0191; -3.7611 (220.09)   | 0.0002; -0.1777 (226.53)   | 0.0029; -1.9733 (226.44)   | 0.0023; 1.7635 (222.34)    |
| 7        | 0.0105; -26.7967 (222.86)                                    | 0.0059; 3.1499 (218.75)    | 0.0000; -0.0014 (208.12)   | 0.0004; -0.2243 (205.93)   | 0.0639; -37.5537 (219.53)  |
| 8        | 0.0329; 8.9101 (217.65)                                      | 0.0081; 2.7164 (216.00)    | 0.0001; 0.0155 (201.57)    | 0.0001; 0.1497 (199.58)    | 0.0275; -7.3890 (217.84)   |
| 9        | 0.0089; 8.5240 (208.76)                                      | 0.2088; 7.1478 (203.24)    | 0.0035; 6.4914 (198.25)    | 0.0100; -0.0961 (198.38)   | 0.1122; -122.8316 (204.52) |
| 10       | 0.0165; 61.4149 (204.02)                                     | 0.0006; -17.7430 (200.54)  | 0.1504; 132.0107 (197.02)  | 0.2700; -4.8348 (197.47)   | 0.0088; 25.7610 (202.14)   |
| 11       | 0.0201; 15.7190 (203.70)                                     | 0.0651; -6.0875 (199.76)   | 0.0082; -9.9056 (196.39)   | 0.0092; 0.4659 (196.47)    | 0.1381; -40.0276 (200.23)  |
| 12       | 0.0263; -47.3685 (201.78)                                    | 0.0531; -8.3410 (196.16)   | 0.2482; -166.3915 (195.88) | 0.2119; 23.8200 (195.56)   | 0.1174; 3.0659 (198.70)    |
| 13       | 0.0444; 21.3252 (196.85)                                     | 0.1165; 181.2642 (195.43)  | 0.4392; 632.0614 (192.81)  | 0.2963; 438.2106 (192.92)  | 0.1838; 143.4599 (194.41)  |
| 14       | 0.1097; 135.7690 (195.58)                                    | 0.1892; -98.6077 (194.47)  | 0.3032; -337.4858 (192.26) | 0.1391; -223.8187 (192.33) | 0.0907; 22.0928 (193.78)   |
| 15       | 0.0405; -82.3423 (194.36)                                    | 0.5759; -98.6031 (190.60)  | 0.0543; -176.0838 (191.90) | 0.0330; -68.0687 (191.46)  | 0.0832; 394.6248 (192.47)  |
| 16       | 0.2882; -377.1381 (192.60)                                   | 0.4845; -8.2240 (189.58)   | 0.2877; -119.4760 (190.27) | 0.5524; -175.3829 (191.11) | 0.3280; -405.2140 (190.53) |
| 17       | 0.4739; 311.1505 (191.89)                                    | 0.0065; -11.8211 (187.78)  | 0.0021; 8.7284 (187.81)    | 0.0100; 25.9359 (189.22)   | 0.2544; -95.8496 (189.93)  |
| 18       | 0.2674; -63.7565 (189.82)                                    | 0.0058; 7.5853 (185.26)    | 0.0001; -0.1974 (184.34)   | 0.0012; 0.5573 (184.34)    | 0.0231; 6.1507 (188.03)    |
| 19       | 0.0285; -6.8143 (187.44)                                     | 0.0082; 25.7111 (182.82)   | 0.0004; 0.6159 (184.08)    | 0.0011; -0.9242 (183.57)   | 0.0118; 31.6903 (187.94)   |
| 20       | 0.1058; -0.1345 (185.37)                                     | 0.0245; -13.7221 (181.62)  | 0.0000; 0.0322 (179.48)    | 0.0000; -0.0213 (179.36)   | 0.0105; -11.7572 (186.84)  |
| 21       | 0.0015; 4.1963 (182.27)                                      | 0.0117; -3.3344 (179.32)   | 0.0170; 4.5314 (177.61)    | 0.0019; -2.6942 (177.60)   | 0.0127; -10.4311 (179.45)  |
| 22       | 0.0082; -7.0305 (181.02)                                     | 0.0889; -38.7026 (178.63)  | 0.0153; 3.3691 (176.96)    | 0.0196; -14.2094 (176.58)  | 0.0100; -1.2064 (177.19)   |
| 23       | 0.0099; 33.0452 (179.38)                                     | 0.0240; -3.8343 (177.16)   | 0.0860; 16.2213 (175.79)   | 0.0936; 9.7985 (175.55)    | 0.0039; 7.7787 (174.12)    |
| 24       | 0.1158; -41.7518 (179.26)                                    | 0.0042; -1.6674 (176.01)   | 0.0106; 3.9404 (174.72)    | 0.0780; -6.1894 (175.12)   | 0.0499; -17.4094 (173.79)  |
| 25       | 0.0162; -1.1745 (175.54)                                     | 0.0031; -3.5176 (173.35)   | 0.0431; 7.9168 (173.41)    | 0.0003; 0.1055 (173.82)    | 0.0065; 0.2777 (172.30)    |
| 26       | 0.0054; -0.6687 (174.19)                                     | 0.0470; 6.5657 (170.26)    | 0.0007; -0.3251 (171.97)   | 0.0007; -0.4333 (171.59)   | 0.0471; 17.1051 (172.06)   |
| 27       | 0.0221; -20.1334 (173.49)                                    | 0.0011; -1.2352 (169.95)   | 0.0029; -3.9366 (170.63)   | 0.0078; -5.6926 (170.84)   | 0.0047; -3.9579 (171.03)   |
| 28       | 0.0070; -5.5098 (172.21)                                     | 0.0110; 1.8495 (169.40)    | 0.0075; -4.5811 (170.51)   | 0.0003; 0.9267 (170.20)    | 0.0152; -2.7543 (169.87)   |
| 29       | 0.0020; 5.6665 (170.85)                                      | 0.0019; -1.2317 (169.34)   | 0.0034; 10.3004 (169.78)   | 0.1130; -21.2202 (169.91)  | 0.0191; 17.4567 (169.80)   |
| 30       | 0.0059; 12.0022 (170.47)                                     | 0.0362; 14.8011 (168.35)   | 0.0760; 17.9410 (169.56)   | 0.0844; -49.2315 (169.58)  | 0.0061; 22.3427 (169.42)   |
| 31       | 0.0196; -12.9549 (170.30)                                    | 0.0083; 2.7452 (167.87)    | 0.0696; 21.8550 (168.88)   | 0.0005; -0.6427 (168.73)   | 0.0663; 16.5317 (168.69)   |
| 32       | 0.0040; -0.6175 (170.12)                                     | 0.0084; -2.7226 (167.25)   | 0.0005; 0.1886 (168.75)    | 0.0015; 0.0797 (168.62)    | 0.0194; -49.5434 (168.03)  |
| 33       | 0.0003; 2.6206 (169.22)                                      | 0.0842; 4.7018 (166.10)    | 0.0030; 0.7728 (167.73)    | 0.0117; -7.4210 (168.06)   | 0.0104; -14.6432 (167.88)  |
| 34       | 0.0062; -13.8459 (168.61)                                    | 0.0177; 14.7758 (166.00)   | 0.0168; -36.9035 (167.67)  | 0.0016; -3.0381 (167.50)   | 0.0382; -55.5874 (167.47)  |
| 35       | 0.0058; 14.7843 (167.60)                                     | 0.0312; 0.1159 (165.72)    | 0.0283; 40.7153 (167.64)   | 0.0010; -0.4475 (166.86)   | 0.0485; 11.8895 (167.42)   |
| 36       | 0.0031; -9.3719 (167.28)                                     | 0.0048; -3.2273 (165.40)   | 0.0036; 1.1428 (166.23)    | 0.0011; 0.7172 (166.01)    | 0.0170; 7.4816 (166.63)    |
| 37       | 0.0292; -8.6149 (166.58)                                     | 0.0093; 10.8056 (164.27)   | 0.0056; -7.9964 (165.82)   | 0.0071; 5.5006 (165.35)    | 0.0011; 2.4814 (165.65)    |
| 38       | 0.0519; -60.0623 (166.03)                                    | 0.1290; -20.0242 (163.46)  | 0.0046; 1.5586 (165.28)    | 0.0099; 19.5203 (163.89)   | 0.0022; -11.1012 (165.21)  |
| 39       | 0.0135; -40.8999 (165.77)                                    | 0.0091; 19.4347 (163.17)   | 0.0023; -11.7767 (164.78)  | 0.0067; 1.4228 (163.39)    | 0.0005; -0.0644 (164.85)   |
| 40       | 0.0081; 13.6188 (165.52)                                     | 0.0044; 1.8938 (162.69)    | 0.0057; 0.7762 (163.29)    | 0.0095; -6.5038 (163.20)   | 0.0035; 10.0634 (164.76)   |
| 41       | 0.0546; 33.9114 (165.06)                                     | 0.0011; 1.9464 (162.57)    | 0.0033; 3.0542 (163.20)    | 0.0028; -1.3188 (162.11)   | 0.0922; 22.8822 (163.95)   |
| 42       | 0.0193; 3.6448 (164.92)                                      | 0.0116; 15.4935 (162.31)   | 0.0024; -0.8194 (162.96)   | 0.0008; 1.7129 (161.95)    | 0.0164; -7.9617 (163.70)   |
| 43       | 0.0254; 1.9331 (164.05)                                      | 0.0205; -13.8923 (162.17)  | 0.0014; -1.3594 (162.35)   | 0.0004; -1.4509 (161.91)   | 0.0348; -11.5368 (163.49)  |
| 44       | 0.0530; 2.5071 (163.70)                                      | 0.0318; -16.8302 (161.36)  | 0.0073; 3.7870 (161.63)    | 0.0094; 1.2164 (161.83)    | 0.0052; 3.7840 (163.29)    |
| 45       | 0.0214; -1.4965 (163.56)                                     | 0.0005; -0.8851 (161.11)   | 0.0041; 2.4970 (161.16)    | 0.0014; 1.4662 (161.00)    | 0.0072; 10.4075 (162.33)   |
| 46       | 0.0070; -5.7965 (163.18)                                     | 0.0157; -12.6384 (160.70)  | 0.0009; -0.0212 (160.41)   | 0.0008; -4.4681 (160.46)   | 0.0260; 28.8343 (161.91)   |
| 47       | 0.0150; 17.1018 (162.94)                                     | 0.0062; 8.8510 (160.38)    | 0.0156; 5.8066 (160.27)    | 0.0129; -10.0120 (159.79)  | 0.0177; -13.9870 (161.80)  |
| 48       | 0.0005; -1.7943 (161.75)                                     | 0.0008; -3.2938 (160.31)   | 0.0088; -5.4895 (159.89)   | 0.0031; -17.8106 (159.62)  | 0.0065; -13.9344 (161.15)  |
| 49       | 0.0057; -12.1226 (161.70)                                    | 0.0027; -2.5105 (159.83)   | 0.0289; 13.1730 (159.66)   | 0.0295; 8.2213 (158.91)    | 0.0022; -0.6190 (160.47)   |
| 50       | 0.0083; 4.9269 (161.21)                                      | 0.0067; 2.4735 (159.54)    | 0.0069; 12.8462 (158.95)   | 0.0048; 11.1890 (158.55)   | 0.0116; 0.8256 (160.37)    |

**Figure S1.** Preparation of one of the sensing surfaces for the developed assay: blocking of the substrate-binding site of SMYD3 with a tight-binding inhibitor EPZ031686. Injection of 1  $\mu\text{M}$  of EPZ031686 was performed in an interactive run mode, with a standard "Inject" command, the data is unreferenced. Baseline level increment of 58 RU corresponds to saturation of the corresponding binding site. Theoretical increment ( $R_{max}$ ) for a compound with a similar  $M_w$  and SMYD3 immobilization level of approx. 10000 RU is 100 RU, assuming 100% activity of the immobilized protein.

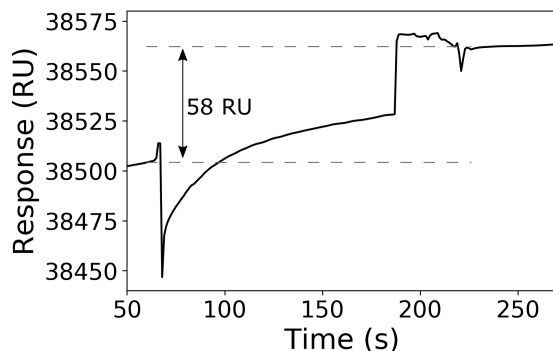

**Figure S2.** Characterization of the control compound, S-adenosyl-homocysteine (SAH). SAH was injected over SMYD3-functionalized biosensing surface in 2-fold serial dilution series, spanning concentration range 50–0.098  $\mu\text{M}$ . Double-referenced interaction kinetic curves (black) were approximated with a 1:1 kinetic model (red), quantified interaction parameters: association rate constant  $k_a = 5.4 \times 10^5 \text{ M}^{-1} \text{ s}^{-1}$ , dissociation rate constant  $k_d = 0.3 \text{ s}^{-1}$ , dissociation constant  $K_D = 560 \text{ nM}$ . The data is referenced against surface with denatured SMYD3.

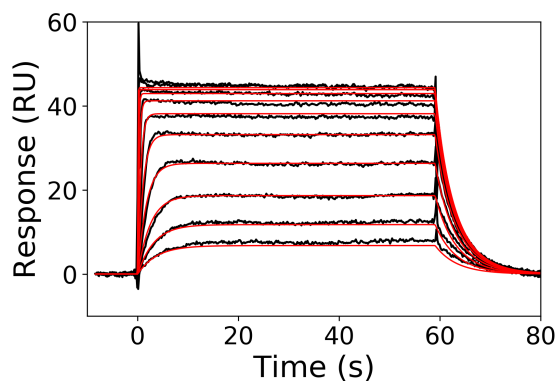

**Figure S3.** Kinetic curves of a fixed concentration injection of 25  $\mu\text{M}$  SAH in the developed screening setup. (A) Unreferenced data. Responses from two flow cells are shown: reference flow cell containing immobilized SMYD3, denaturated with 6 M guanidine hydrochloride (black), analytical flow cell with SMYD3, immobilized at the same level (red). (B) Referenced sensorgram for the same data.

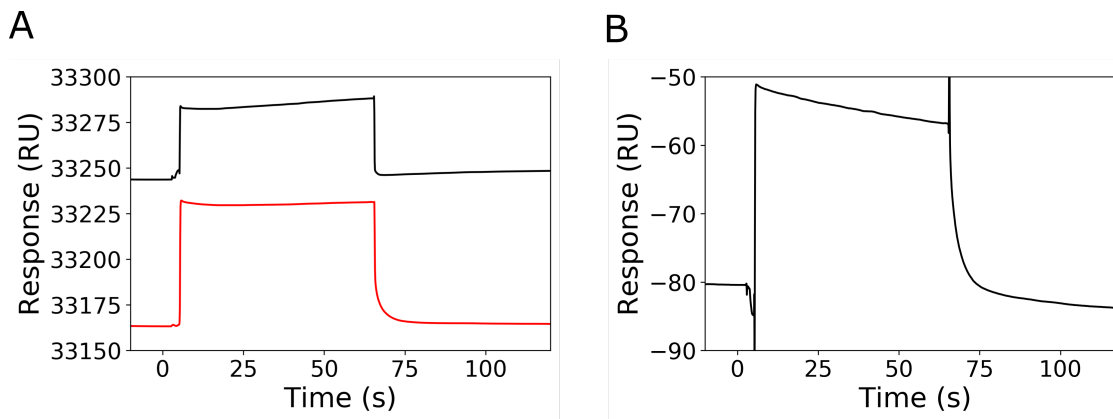

**Figure S4.** Interaction kinetic analysis of the screening hit, racemic dipiperodon (*rac*-diperodon) and immobilized SMYD3. The compound was injected in two-fold dilution series, spanning concentration range 100–0.4  $\mu\text{M}$ . The data is referenced against surface with denatured SMYD3.

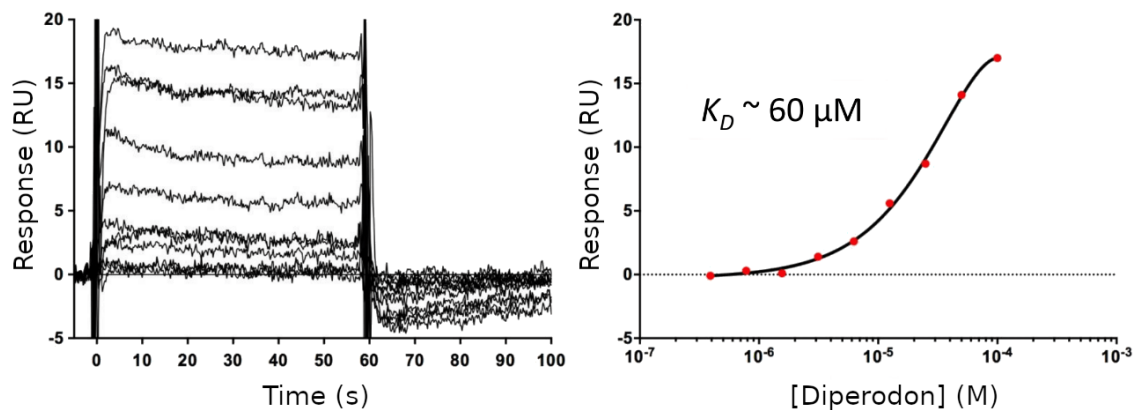

**Figure S5.** Interaction kinetic analysis of the screening hit, racemic dipiperodon (*rac*-diperodon) and immobilized SMYD3 with the substrate binding site, blocked with tight-binding SMYD3 inhibitor EPZ031686. The compound was injected in two-fold dilution series, spanning concentration range 100–0.4  $\mu\text{M}$ . The data is referenced against surface with denatured SMYD3.

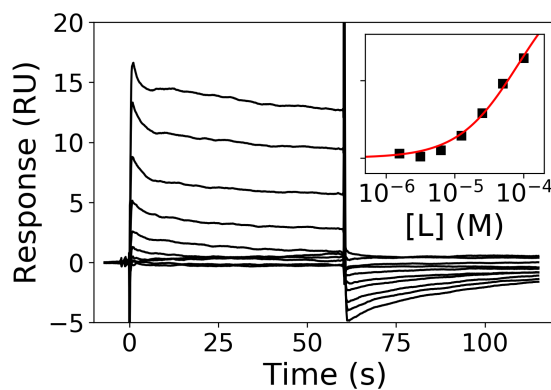

**Figure S6.** Geometries of the conformers of (*R*)-diperodon (conjugate acid form) having a relative electronic energy below 1 kcal mol<sup>-1</sup>, as calculated by DFT optimization at the B97D/def2-TZVP/IEFPCM[H<sub>2</sub>O] level: **c015** (12.03%), **c117** (7.69%), **c284** (5.50%), **c020** (5.15%), **c016** (4.89%), **c107** (4.77%), **c071** (4.74%), **c008** (3.61%), **c122** (3.13%), **c127** (2.79%), **c002** (2.79%), **c026** (2.55%), **c001** (2.40%), **c036** (2.38%), **c137** (2.28%).

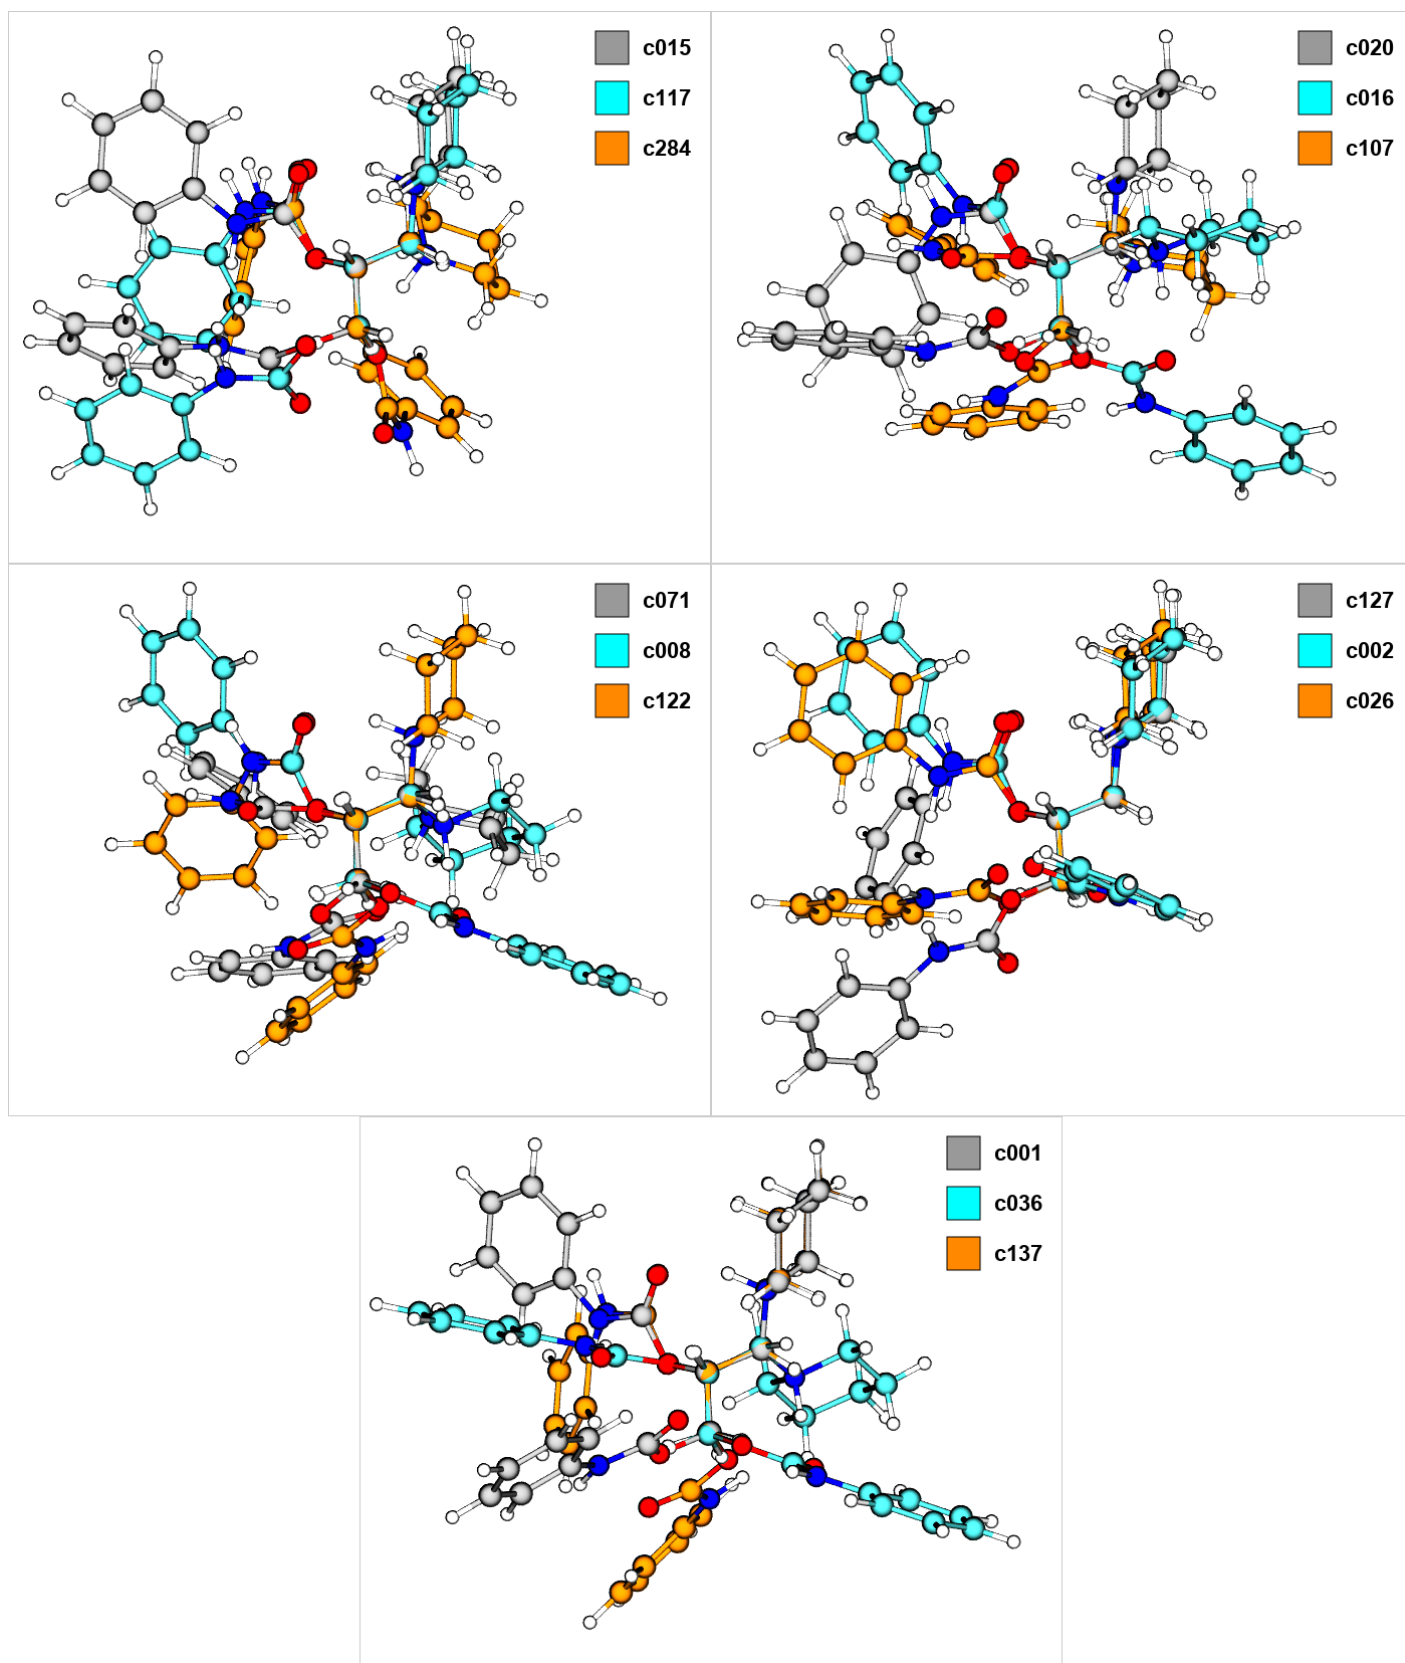

**Figure S7.** Comparison between the experimental UV spectrum of the first enantiomeric fraction of dipiperodon on the Lux Cellulose-2 column and the theoretical UV spectrum of (*R*)-diperodon (conjugate acid form), as calculated at the PBE0/def2-TZVP/IEFPCM[H<sub>2</sub>O] level of theory after B97D/def2-TZVP/IEFPCM[H<sub>2</sub>O] optimization.

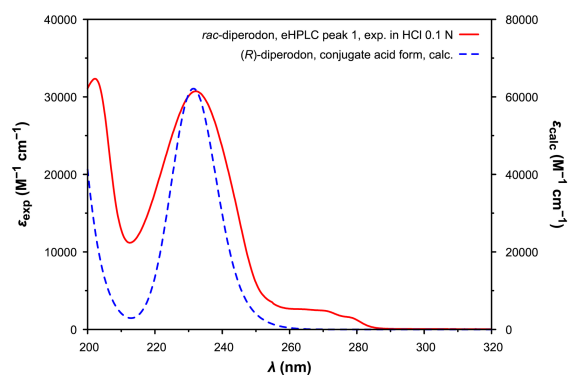

**Figure S8.** Deconvoluted mass spectra of MAP3K2<sub>249–274</sub> peptide as substrate for SMYD3 methylation activity in absence (a) and presence (b) of 100 μM of *rac*-diperodon.

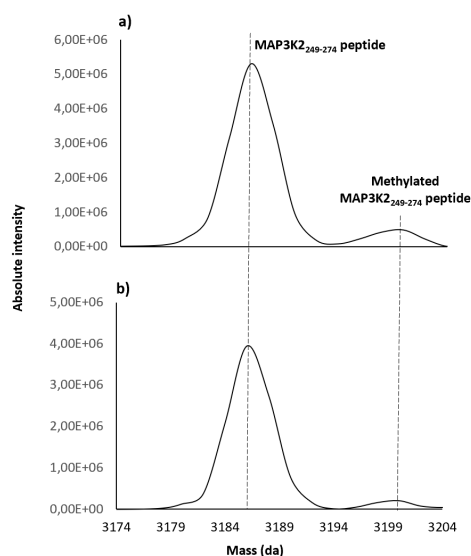

**Table S3.** Determination of inhibitory potency of dipiperodon, its individual enantiomers, the reconstituted racemic mixture, and the reference compound EPZ031686. *rac*-Diperodon, (*S*)-diperodon, (*R*)-diperodon and reconstituted *rac*-diperodon were assayed at 100 μM final concentration, while EPZ03168 was assayed at 0.63 μM final concentration, close to its *IC*<sub>50</sub>.

|                                     | Methylation, % |              | Inhibition analysis, % |              |
|-------------------------------------|----------------|--------------|------------------------|--------------|
|                                     | Experiment 1   | Experiment 2 | Inhibition 1           | Inhibition 2 |
| Control (2% DMSO)                   | 8.06 ± 0.05    | 8.06 ± 0.09  | -                      | -            |
| <i>rac</i> -diperodon               | 4.36 ± 0.08    | 4.59 ± 0.10  | 45.9                   | 43.0         |
| ( <i>S</i> )-diperodon              | 4.28 ± 0.02    | 4.45 ± 0.07  | 46.9                   | 44.8         |
| ( <i>R</i> )-diperodon              | 4.74 ± 0.11    | 4.87 ± 0.01  | 41.2                   | 39.6         |
| reconstituted <i>rac</i> -diperodon | 4.95 ± 0.06    | 4.77 ± 0.07  | 38.6                   | 40.8         |
| EPZ031686                           | 3.71 ± 0.01    | 3.90 ± 0.04  | 54.0                   | 51.6         |



**Figure S9.** Interaction of the C-terminal domain of HSP90 with SMYD3 in presence and absence of (*S*)-diperodon. (A) Single-concentration injections of 100  $\mu$ M of HSP90<sub>626–732</sub> over surface-immobilized SMYD3 in presence (red) and absence (black) of 100  $\mu$ M of (*S*)-diperodon. (B) and (C): injection of SMYD3 dilution series over surface-immobilized GST-HSP90<sub>626–732</sub> in presence (A) and absence (B) of 100  $\mu$ M of (*S*)-diperodon. For competition experiments, diperodon was added in every analytical injection including blank injections, reference surfaces contained no immobilized protein. No strong evidence of competition between diperodon and C-terminal domain of HSP90 for interaction with SMYD3 was observed.

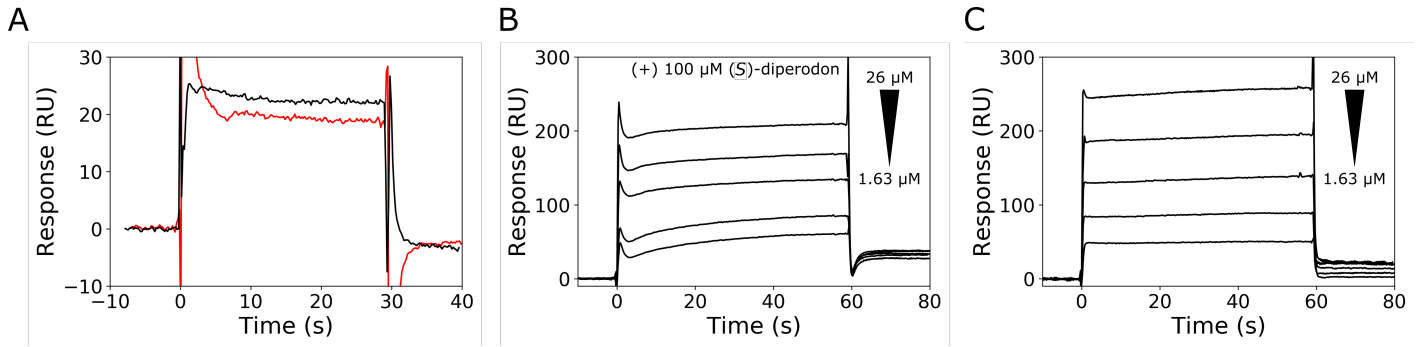

**Figure S10.** Original uncropped Western Blotting results, providing DMSO controls in the same membranes.

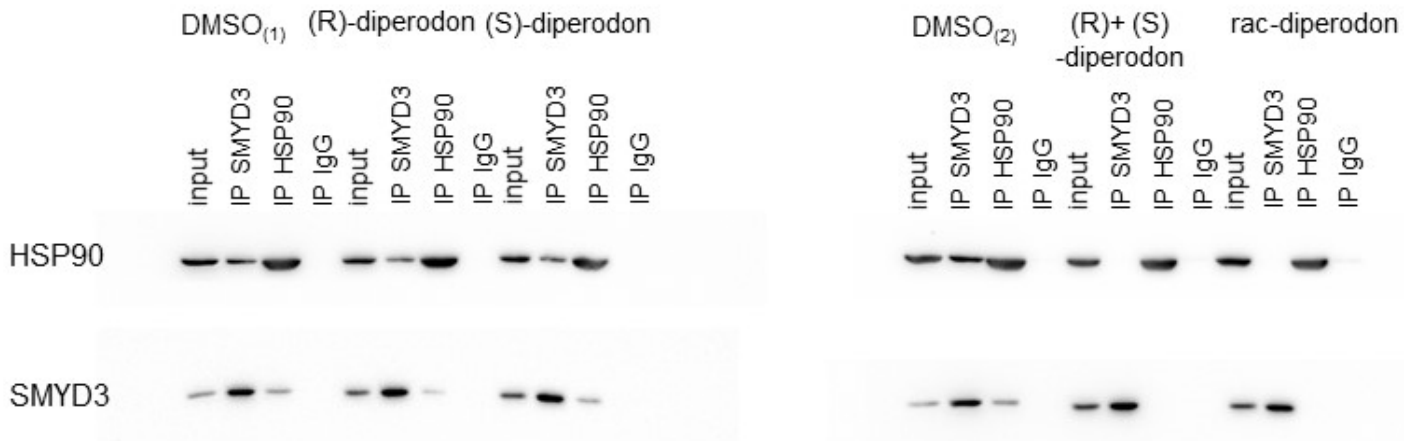

**Table S4.** Crystallographic data collection and model refinement statistics; values in parenthesis are given for the highest resolution shell.

| PDB ID                                           | Data collection                                              |                                                              |
|--------------------------------------------------|--------------------------------------------------------------|--------------------------------------------------------------|
|                                                  | 6Z2R                                                         | 6YUH                                                         |
| Structure                                        | SMYD3/( <i>S</i> )-diperodon                                 | SMYD3/( <i>R</i> )-diperodon                                 |
| Beamline                                         | ESRF ID 29                                                   | MAX IV BioMAX                                                |
| Wavelength, Å                                    | 0.976                                                        | 0.976                                                        |
| Space group                                      | <i>P</i> <sub>2</sub> <sub>1</sub> <sub>2</sub> <sub>1</sub> | <i>P</i> <sub>2</sub> <sub>1</sub> <sub>2</sub> <sub>1</sub> |
| Unit cell: a, b, c, Å                            | 60.9, 66.05, 102.3                                           | 60.14, 66.28, 105.95                                         |
| Resolution range, Å                              | 44.78-1.61 (1.67-1.61)                                       | 105.95-1.93 (1.98-1.93)                                      |
| Unique reflections                               | 56675 (5553)                                                 | 32606 (2145)                                                 |
| Multiplicity                                     | 5.1 (4.8)                                                    | 9.3 (7.3)                                                    |
| Completeness, %                                  | 99.93 (99.69)                                                | 100.0 (100.0)                                                |
| <i>R</i> <sub>merge</sub>                        | 0.07 (1.28)                                                  | 0.192 (1.788)                                                |
| CC <sub>1/2</sub>                                | 0.99 (0.48)                                                  | 1 (0.52)                                                     |
|                                                  | Refinement                                                   |                                                              |
| Nr. refl. in test set                            | 2730 (4.8 %)                                                 | 1621 (5.0 %)                                                 |
| R/ <i>R</i> <sub>free</sub> %/%                  | 18.4/21.4                                                    | 18.6/23.0                                                    |
| Nr. non-H atoms/average B-factor, Å <sup>2</sup> |                                                              |                                                              |
| protein                                          | 3470/27.1                                                    | 3458/27.6                                                    |
| H <sub>2</sub> O                                 | 526/37                                                       | 256/31.5                                                     |
| ligand                                           | 52/44                                                        | 50/42.3                                                      |
| Ramachandran plot, %                             |                                                              |                                                              |
| favoured                                         | 98.58                                                        | 98.58                                                        |
| allowed                                          | 1.42                                                         | 1.42                                                         |
| outliners                                        | 0                                                            | 0                                                            |
| RMS deviations                                   |                                                              |                                                              |
| bond length, Å                                   | 0.01                                                         | 0.007                                                        |
| bond angles, °                                   | 1.41                                                         | 0.82                                                         |
